# Supplementary material
Source: PubMed Central journal article supplement (PMC7669231)
Supplement: djaa007_supplementary_data.pdf [file djaa007_supplementary_data.pdf]

## **Supplementary Material:**

### **International trends in the incidence of cancer among adolescents and young adults**

Sumit Gupta<sup>1,@</sup>, Andrew Harper<sup>2</sup>, Yibing Ruan<sup>2</sup>, Ronald Barr<sup>3</sup>, A. Lindsay Frazier<sup>4</sup>, Jacques Ferlay<sup>5</sup>, Eva Steliarova-Foucher<sup>5</sup>, Miranda M Fidler-Benaoudia<sup>2,6,@</sup>

1 – Division of Hematology/Oncology, The Hospital for Sick Children, Toronto, Ontario, Canada

2 – Department of Cancer Epidemiology and Prevention Research, CancerControl Alberta, Alberta Health Services, Calgary, Alberta, Canada

3 – Department of Pediatrics, McMaster University, Hamilton, Ontario, Canada

4 – Dana Farber Cancer Institute, Boston, Massachusetts, United States of America

5 – Section of Cancer Surveillance, International Agency for Research on Cancer, Lyon, France

6 – Departments of Oncology and Community Health Sciences, University of Calgary, Calgary, Alberta, Canada

#### **CORRESPONDING AUTHORS:**

Miranda M Fidler-Benaoudia

Room 508B, Holy Cross Centre, 2210 2<sup>nd</sup> St. SW

Department of Cancer Epidemiology and Prevention Research

Calgary, Alberta, T2S 3C3 Canada

Telephone: +1 403 355 3277

Fax: +1 403 264 264

Email: [Miranda.Fidler-Benaoudia@ahs.ca](mailto:Miranda.Fidler-Benaoudia@ahs.ca)

Sumit Gupta

Hospital for Sick Children

Room 9402, 555 University Avenue

Toronto, Ontario, M5G 1X8 Canada

Phone: +1 416 813 7654 ext. 201681

Email: [sumit.gupta@sickkids.ca](mailto:sumit.gupta@sickkids.ca)

Supplementary Table 1: Registries included in data analyses and number of cases, for 15-39 year olds during the period of 1998-2012 for all cancers excluding non-melanoma skin cancers

| Country                                                                                                  | No. of Cases<br>(Pct. of Total) |
|----------------------------------------------------------------------------------------------------------|---------------------------------|
| <b>Africa</b>                                                                                            |                                 |
| Uganda*                                                                                                  | 7,395                           |
| <i>Uganda – Kampala</i>                                                                                  | 7,395 (100.0%)                  |
| <b>South America</b>                                                                                     |                                 |
| Brazil*                                                                                                  | 4,143                           |
| <i>Brazil – Goiania</i>                                                                                  | 4,143 (100.0%)                  |
| Chile*                                                                                                   | 1,084                           |
| <i>Chile – Valdivia</i>                                                                                  | 1,084 (100.0%)                  |
| Colombia*                                                                                                | 6,101                           |
| <i>Colombia – Cali</i>                                                                                   | 6,101 (100.0%)                  |
| Ecuador*                                                                                                 | 4,724                           |
| <i>Ecuador – Quito</i>                                                                                   | 4,724 (100.0%)                  |
| <b>North America</b>                                                                                     |                                 |
| Canada*                                                                                                  | 80,414                          |
| <i>Canada (excluding Nunavut, Quebec, and Yukon)</i>                                                     | 80,414 (100.0%)                 |
| United States of America*                                                                                | 952,752                         |
| <i>United States of America – National Program of Cancer Registries</i>                                  | 952,752 (100.0%)                |
| <i>United States of America – National Program of Cancer Registries: American, Indian, Alaska Native</i> | 5,166 (0.5%)                    |
| <i>United States of America – National Program of Cancer Registries: Asian, Pacific Islander</i>         | 37,246 (3.9%)                   |
| <i>United States of America – National Program of Cancer Registries: Black</i>                           | 112,079 (11.8%)                 |
| <i>United States of America – National Program of Cancer Registries: White</i>                           | 783,260 (82.2%)                 |
| <b>Asia</b>                                                                                              |                                 |
| Bahrain*                                                                                                 | 937                             |
| <i>Bahrain (Bahraini population)</i>                                                                     | 937 (100.0%)                    |
| China*                                                                                                   | 40,275                          |
| <i>China – Harbin</i>                                                                                    | 1,968 (4.9%)                    |
| <i>China – Hong Kong</i>                                                                                 | 20,441 (50.8%)                  |
| <i>China – Jiashan</i>                                                                                   | 737 (1.8%)                      |
| <i>China – Shanghai</i>                                                                                  | 12,810 (31.8%)                  |
| <i>China – Zhongshan</i>                                                                                 | 4,319 (10.7%)                   |
| India*                                                                                                   | 8,947                           |
| <i>India – Chennai</i>                                                                                   | 8,947 (100.0%)                  |
| Israel                                                                                                   | 22,408                          |
| Japan*                                                                                                   | 21,402                          |
| <i>Japan – Fukui</i>                                                                                     | 1,531 (7.2%)                    |
| <i>Japan – Nagasaki</i>                                                                                  | 3,137 (14.7%)                   |
| <i>Japan – Osaka</i>                                                                                     | 16,734 (78.2%)                  |
| Kuwait*                                                                                                  | 2,009                           |
| <i>Kuwait (Kuwaiti population)</i>                                                                       | 2,009 (100.0%)                  |
| Philippines*                                                                                             | 15,678                          |
| <i>Philippines – Manila</i>                                                                              | 15,678 (100.0%)                 |
| Republic of Korea*                                                                                       | 77,486                          |
| <i>Republic of Korea – Busan</i>                                                                         | 13,292 (17.2%)                  |
| <i>Republic of Korea – Gwangju</i>                                                                       | 6,914 (8.9%)                    |
| <i>Republic of Korea – Incheon</i>                                                                       | 10,619 (13.7%)                  |
| <i>Republic of Korea – Seoul</i>                                                                         | 46,661 (60.2%)                  |
| Thailand*                                                                                                | 11,889                          |
| <i>Thailand – Chiang Mai</i>                                                                             | 4,083 (34.3%)                   |
| <i>Thailand – Khon Kaen</i>                                                                              | 3,281 (27.6%)                   |
| <i>Thailand – Lampang</i>                                                                                | 1,848 (15.5%)                   |
| <i>Thailand – Songkhla</i>                                                                               | 2,677 (22.5%)                   |
| Turkey*                                                                                                  | 14,791                          |
| <i>Turkey – Antalya</i>                                                                                  | 4,151 (28.1%)                   |
| <i>Turkey – Izmir</i>                                                                                    | 10,640 (71.9%)                  |
| <b>Europe</b>                                                                                            |                                 |
| Austria                                                                                                  | 24,839                          |
| Belarus                                                                                                  | 28,005                          |
| Bulgaria                                                                                                 | 20,644                          |
| Croatia                                                                                                  | 13,781                          |
| Cyprus                                                                                                   | 2,690                           |
| Czech Republic                                                                                           | 30,523                          |
| Denmark                                                                                                  | 18,376                          |
| Estonia                                                                                                  | 3,401                           |
| France*                                                                                                  | 21,614                          |
| <i>France – Calvados</i>                                                                                 | 2,016 (9.3%)                    |
| <i>France – Doubs</i>                                                                                    | 1,675 (7.7%)                    |

|                                                   |                 |
|---------------------------------------------------|-----------------|
| <i>France – Haut-Rhin</i>                         | 2,382 (11.0%)   |
| <i>France – Hérault</i>                           | 3,204 (14.8%)   |
| <i>France – Isère</i>                             | 4,095 (18.9%)   |
| <i>France – Loire-Atlantique</i>                  | 4,205 (19.5%)   |
| <i>France – Manche</i>                            | 1,333 (6.2%)    |
| <i>France – Martinique</i>                        | 923 (4.3%)      |
| <i>France – Somme</i>                             | 1,781 (8.2%)    |
| Germany*                                          | 9,002           |
| <i>Germany – Hamburg</i>                          | 5,995 (66.6%)   |
| <i>Germany – Saarland</i>                         | 3,007 (33.4%)   |
| Iceland                                           | 1,068           |
| Ireland                                           | 13,443          |
| Italy*                                            | 12,734          |
| <i>Italy – Biella</i>                             | 634 (5.0%)      |
| <i>Italy – Modena</i>                             | 2,604 (20.4%)   |
| <i>Italy – Naples</i>                             | 2,289 (18.0%)   |
| <i>Italy – Parma</i>                              | 1,680 (13.2%)   |
| <i>Italy – Ragusa</i>                             | 982 (7.7%)      |
| <i>Italy – Romagna</i>                            | 4,545 (35.7%)   |
| Lithuania                                         | 9,028           |
| Malta                                             | 1,056           |
| Netherlands                                       | 53,763          |
| Norway                                            | 15,405          |
| Poland*                                           | 2,812           |
| <i>Poland – Kielce</i>                            | 2,812 (100.0%)  |
| Slovenia                                          | 6,482           |
| Spain*                                            | 14,045          |
| <i>Spain – Basque Country</i>                     | 6,857 (48.8%)   |
| <i>Spain – Girona</i>                             | 2,066 (14.7%)   |
| <i>Spain – Granada</i>                            | 2,773 (19.7%)   |
| <i>Spain – Tarragona</i>                          | 2,349 (16.7%)   |
| Switzerland*                                      | 8,210           |
| <i>Switzerland – Geneva</i>                       | 1,720 (21.0%)   |
| <i>Switzerland – Neuchâtel</i>                    | 550 (6.7%)      |
| <i>Switzerland – St. Gall-Appenzell</i>           | 1,635 (19.9%)   |
| <i>Switzerland – Ticino</i>                       | 1,140 (13.9%)   |
| <i>Switzerland – Valais</i>                       | 947 (11.5%)     |
| <i>Switzerland – Vaud</i>                         | 2,218 (27.0%)   |
| United Kingdom*                                   | 167,412         |
| <i>United Kingdom – England*</i>                  | 146,789 (87.7%) |
| <i>United Kingdom – England: East England</i>     | 14,860 (10.1%)  |
| <i>United Kingdom – England: East-Midlands</i>    | 12,105 (8.2%)   |
| <i>United Kingdom – England: London</i>           | 24,325 (16.6%)  |
| <i>United Kingdom – England: North-East</i>       | 7,406 (5.0%)    |
| <i>United Kingdom – England: North-West</i>       | 19,173 (13.1%)  |
| <i>United Kingdom – England: South-East</i>       | 23,812 (16.2%)  |
| <i>United Kingdom – England: South-West</i>       | 15,161 (10.3%)  |
| <i>United Kingdom – England: West-Midlands</i>    | 14,767 (10.1%)  |
| <i>United Kingdom – England: Yorkshire-Humber</i> | 15,180 (10.3%)  |
| <i>United Kingdom – Northern Ireland</i>          | 5,256 (3.1%)    |
| <i>United Kingdom – Scotland</i>                  | 15,367 (9.2%)   |
| <b>Oceania</b>                                    |                 |
| Australia                                         | 81,024          |
| <i>Australia – New South Wales</i>                | 27,434 (33.9%)  |
| <i>Australia – Northern Territories</i>           | 809 (1.0%)      |
| <i>Australia – Queensland</i>                     | 18,202 (22.5%)  |
| <i>Australia – South Australia</i>                | 5,530 (6.8%)    |
| <i>Australia – Tasmania</i>                       | 1,757 (2.2%)    |
| <i>Australia – Victoria</i>                       | 18,924 (23.4%)  |
| <i>Australia – Western Australia</i>              | 8,368 (10.3%)   |
| New Zealand                                       | 14,796          |

---

\*Sub-National

---

Supplementary Table 2: Number of cases and truncated age-standardized rate (ASR) per 100,000 person-years for 15-39 year olds during the period of 1998-2012 for cancers of the bladder, bone, brain (central nervous system), connective and soft tissue, corpus uteri (female only), eye, gallbladder and extrahepatic ducts, Hodgkin lymphoma, Kaposi sarcoma, larynx, leukaemia, lip (oral cavity and pharynx), liver and intrahepatic bile ducts, lung (incl. trachea), melanoma of skin, multiple myeloma and immunoproliferative diseases, Non-Hodgkin lymphoma, oesophagus, ovary (female only), pancreas, prostate (male only), and stomach.

| Country                               | Bladder                           | Bone                              | Brain, central nervous system     | Connective and soft tissue        | Corpus uteri                      | Eye                               | Gallbladder and extrahepatic ducts |
|---------------------------------------|-----------------------------------|-----------------------------------|-----------------------------------|-----------------------------------|-----------------------------------|-----------------------------------|------------------------------------|
|                                       | No. of Cases<br>(ASR per 100,000)  |
| <b>Africa</b>                         |                                   |                                   |                                   |                                   |                                   |                                   |                                    |
| Uganda*                               | 26 (0.19)                         | 140 (0.96)                        | 68 (0.52)                         | 168 (1.33)                        | 20 (0.40)                         | 250 (2.18)                        | 2 (0.02)                           |
| <b>South America</b>                  |                                   |                                   |                                   |                                   |                                   |                                   |                                    |
| Brazil*                               | 24 (0.27)                         | 106 (1.31)                        | 255 (2.96)                        | 95 (1.12)                         | 34 (0.73)                         | 36 (0.42)                         | 17 (0.19)                          |
| Chile*                                | 6 (0.25)                          | 31 (1.39)                         | 37 (1.66)                         | 17 (0.81)                         | 9 (0.79)                          | 0 (0.00)                          | 15 (0.62)                          |
| Colombia*                             | 25 (0.18)                         | 180 (1.42)                        | 315 (2.36)                        | 184 (1.39)                        | 31 (0.42)                         | 17 (0.12)                         | 24 (0.17)                          |
| Ecuador*                              | 30 (0.29)                         | 105 (1.05)                        | 253 (2.46)                        | 181 (1.77)                        | 32 (0.60)                         | 24 (0.23)                         | 25 (0.25)                          |
| <b>North America</b>                  |                                   |                                   |                                   |                                   |                                   |                                   |                                    |
| Canada*                               | 782 (0.52)                        | 1,289 (1.04)                      | 3,818 (2.78)                      | 1,760 (1.30)                      | 1,125 (1.39)                      | 221 (0.15)                        | 132 (0.08)                         |
| United States of America*             | 10,106 (0.59)                     | 14,047 (0.98)                     | 44,102 (2.87)                     | 19,776 (1.29)                     | 19,479 (2.22)                     | 2,362 (0.14)                      | 1,531 (0.09)                       |
| USA-American, Indian, Alaskan Native* | 49 (0.23)                         | 99 (0.50)                         | 266 (1.31)                        | 125 (0.61)                        | 214 (2.00)                        | 8 (0.04)                          | 12 (0.05)                          |
| USA-Asian-Pacific Islander*           | 251 (0.25)                        | 552 (0.72)                        | 1,488 (1.70)                      | 711 (0.82)                        | 981 (1.82)                        | 55 (0.06)                         | 103 (0.10)                         |
| USA-Black*                            | 656 (0.27)                        | 1,790 (0.82)                      | 3,959 (1.76)                      | 3,259 (1.43)                      | 2,205 (1.72)                      | 113 (0.05)                        | 246 (0.10)                         |
| USA-White*                            | 8,929 (0.67)                      | 11,482 (1.03)                     | 38,025 (3.16)                     | 15,403 (1.28)                     | 15,847 (2.31)                     | 2,134 (0.16)                      | 1,163 (0.08)                       |
| <b>Asia</b>                           |                                   |                                   |                                   |                                   |                                   |                                   |                                    |
| Bahrain*                              | 12 (0.42)                         | 29 (0.96)                         | 37 (1.22)                         | 19 (0.64)                         | 12 (0.81)                         | 1 (0.03)                          | 1 (0.03)                           |
| China*                                | 272 (0.26)                        | 572 (0.69)                        | 1645 (1.79)                       | 718 (0.77)                        | 766 (1.32)                        | 38 (0.04)                         | 119 (0.11)                         |
| India*                                | 43 (0.12)                         | 300 (0.99)                        | 464 (1.43)                        | 200 (0.62)                        | 41 (0.24)                         | 18 (0.05)                         | 62 (0.18)                          |
| Israel                                | 359 (0.90)                        | 448 (1.20)                        | 1,008 (2.60)                      | 517 (1.34)                        | 215 (1.06)                        | 57 (0.14)                         | 23 (0.06)                          |
| Japan*                                | 206 (0.31)                        | 257 (0.53)                        | 754 (1.33)                        | 345 (0.60)                        | 503 (1.43)                        | 12 (0.02)                         | 84 (0.13)                          |
| Kuwait*                               | 19 (0.33)                         | 53 (0.85)                         | 66 (1.13)                         | 41 (0.69)                         | 11 (0.37)                         | 0 (0.00)                          | 1 (0.02)                           |
| Philippines*                          | 75 (0.18)                         | 468 (1.18)                        | 440 (1.08)                        | 362 (0.88)                        | 338 (1.64)                        | 12 (0.03)                         | 37 (0.09)                          |
| Republic of Korea*                    | 464 (0.34)                        | 849 (0.81)                        | 1,953 (1.65)                      | 974 (0.83)                        | 873 (1.28)                        | 57 (0.05)                         | 300 (0.21)                         |
| Thailand*                             | 63 (0.17)                         | 167 (0.56)                        | 411 (1.24)                        | 191 (0.57)                        | 105 (0.54)                        | 36 (0.10)                         | 55 (0.15)                          |
| Turkey*                               | 318 (0.84)                        | 325 (1.03)                        | 933 (2.60)                        | 337 (0.95)                        | 157 (0.80)                        | 22 (0.06)                         | 49 (0.13)                          |
| <b>Europe</b>                         |                                   |                                   |                                   |                                   |                                   |                                   |                                    |
| Austria                               | 283 (0.56)                        | 422 (1.10)                        | 1,332 (2.92)                      | 462 (1.04)                        | 215 (0.78)                        | 56 (0.11)                         | 33 (0.06)                          |
| Belarus                               | 304 (0.50)                        | 444 (0.85)                        | 1,471 (2.58)                      | 610 (1.08)                        | 492 (1.52)                        | 131 (0.21)                        | 36 (0.06)                          |
| Bulgaria                              | 367 (0.78)                        | 341 (0.93)                        | 1,191 (2.77)                      | 402 (0.93)                        | 291 (1.21)                        | 49 (0.11)                         | 37 (0.08)                          |
| Croatia                               | 202 (0.78)                        | 318 (1.53)                        | 1,001 (4.27)                      | 246 (1.06)                        | 124 (0.91)                        | 40 (0.16)                         | 35 (0.13)                          |
| Cyprus                                | 52 (1.13)                         | 54 (1.30)                         | 78 (1.75)                         | 65 (1.42)                         | 19 (0.72)                         | 6 (0.12)                          | 3 (0.07)                           |
| Czech Republic                        | 413 (0.64)                        | 425 (0.81)                        | 1,604 (2.65)                      | 578 (0.96)                        | 354 (1.06)                        | 85 (0.13)                         | 60 (0.09)                          |
| Denmark                               | 164 (0.51)                        | 241 (0.98)                        | 724 (2.52)                        | 495 (1.75)                        | 87 (0.52)                         | 100 (0.32)                        | 25 (0.07)                          |
| Estonia                               | 41 (0.51)                         | 61 (0.91)                         | 205 (2.78)                        | 69 (0.92)                         | 53 (1.25)                         | 8 (0.10)                          | 4 (0.05)                           |
| France*                               | 69 (0.16)                         | 368 (1.14)                        | 924 (2.53)                        | 431 (1.23)                        | 90 (0.43)                         | 60 (0.15)                         | 17 (0.04)                          |
| Germany*                              | 134 (0.79)                        | 138 (1.12)                        | 393 (2.58)                        | 173 (1.16)                        | 55 (0.59)                         | 10 (0.06)                         | 17 (0.09)                          |
| Iceland                               | 16 (0.89)                         | 19 (1.24)                         | 37 (2.10)                         | 19 (1.13)                         | 7 (0.72)                          | 2 (0.12)                          | 2 (0.12)                           |
| Ireland                               | 171 (0.62)                        | 187 (0.82)                        | 712 (2.80)                        | 221 (0.88)                        | 84 (0.58)                         | 46 (0.17)                         | 21 (0.08)                          |
| Italy*                                | 318 (1.59)                        | 161 (1.11)                        | 461 (2.62)                        | 179 (1.05)                        | 102 (0.92)                        | 36 (0.18)                         | 19 (0.09)                          |
| Lithuania                             | 124 (0.60)                        | 157 (0.87)                        | 580 (3.02)                        | 177 (0.94)                        | 126 (1.13)                        | 24 (0.11)                         | 9 (0.04)                           |
| Malta                                 | 19 (0.81)                         | 13 (0.67)                         | 45 (2.05)                         | 25 (1.14)                         | 11 (0.93)                         | 2 (0.09)                          | 2 (0.11)                           |
| Netherlands                           | 865 (0.85)                        | 766 (1.03)                        | 2,344 (2.60)                      | 1,004 (1.15)                      | 210 (0.40)                        | 181 (0.19)                        | 105 (0.10)                         |
| Norway                                | 147 (0.53)                        | 226 (1.02)                        | 849 (3.33)                        | 258 (1.05)                        | 138 (0.92)                        | 57 (0.22)                         | 29 (0.09)                          |
| Poland*                               | 45 (0.59)                         | 56 (0.81)                         | 246 (3.43)                        | 67 (0.94)                         | 34 (0.92)                         | 8 (0.11)                          | 9 (0.12)                           |
| Slovenia                              | 47 (0.36)                         | 92 (0.93)                         | 242 (2.16)                        | 107 (0.95)                        | 43 (0.68)                         | 15 (0.12)                         | 7 (0.05)                           |
| Spain*                                | 337 (1.15)                        | 202 (0.96)                        | 589 (2.34)                        | 324 (1.32)                        | 134 (0.89)                        | 29 (0.09)                         | 21 (0.07)                          |
| Switzerland*                          | 67 (0.48)                         | 126 (1.10)                        | 319 (2.42)                        | 129 (1.02)                        | 63 (0.77)                         | 11 (0.08)                         | 9 (0.06)                           |
| United Kingdom*                       | 925 (0.26)                        | 2,477 (0.90)                      | 7,613 (2.40)                      | 3,134 (1.01)                      | 1,187 (0.64)                      | 505 (0.15)                        | 180 (0.05)                         |
| <b>Oceania</b>                        |                                   |                                   |                                   |                                   |                                   |                                   |                                    |
| Australia                             | 296 (0.23)                        | 1,030 (1.00)                      | 3,077 (2.63)                      | 1,329 (1.16)                      | 681 (1.01)                        | 283 (0.23)                        | 101 (0.08)                         |
| New Zealand                           | 91 (0.36)                         | 246 (1.19)                        | 564 (2.44)                        | 263 (1.16)                        | 209 (1.54)                        | 48 (0.20)                         | 17 (0.07)                          |

| Country                               | Hodgkin lymphoma<br>No. of Cases<br>(ASR per 100,000) | Kaposi sarcoma<br>No. of Cases<br>(ASR per 100,000) | Larynx<br>No. of Cases<br>(ASR per 100,000) | Leukaemia<br>No. of Cases<br>(ASR per 100,000) | Lip, oral cavity and pharynx<br>No. of Cases<br>(ASR per 100,000) | Liver and intrahepatic bile ducts<br>No. of Cases<br>(ASR per 100,000) | Lung (incl. trachea)<br>No. of Cases<br>(ASR per 100,000) |
|---------------------------------------|-------------------------------------------------------|-----------------------------------------------------|---------------------------------------------|------------------------------------------------|-------------------------------------------------------------------|------------------------------------------------------------------------|-----------------------------------------------------------|
| <b>Africa</b>                         |                                                       |                                                     |                                             |                                                |                                                                   |                                                                        |                                                           |
| Uganda*                               | 133 (1.03)                                            | 3074 (25.31)                                        | 20 (0.18)                                   | 157 (1.20)                                     | 226 (1.82)                                                        | 299 (2.45)                                                             | 49 (0.42)                                                 |
| <b>South America</b>                  |                                                       |                                                     |                                             |                                                |                                                                   |                                                                        |                                                           |
| Brazil*                               | 168 (2.00)                                            | 48 (0.54)                                           | 11 (0.12)                                   | 208 (2.46)                                     | 125 (1.45)                                                        | 21 (0.24)                                                              | 48 (0.55)                                                 |
| Chile*                                | 30 (1.39)                                             | 2 (0.09)                                            | 0 (0.00)                                    | 60 (2.80)                                      | 6 (0.28)                                                          | 4 (0.18)                                                               | 2 (0.08)                                                  |
| Colombia*                             | 184 (1.42)                                            | 148 (1.09)                                          | 12 (0.09)                                   | 443 (3.42)                                     | 107 (0.79)                                                        | 30 (0.22)                                                              | 69 (0.50)                                                 |
| Ecuador*                              | 80 (0.79)                                             | 35 (0.34)                                           | 3 (0.03)                                    | 395 (3.95)                                     | 54 (0.52)                                                         | 34 (0.33)                                                              | 59 (0.57)                                                 |
| <b>North America</b>                  |                                                       |                                                     |                                             |                                                |                                                                   |                                                                        |                                                           |
| Canada*                               | 4,986 (3.91)                                          | 180 (0.12)                                          | 101 (0.06)                                  | 3,423 (2.54)                                   | 1,872 (1.26)                                                      | 353 (0.24)                                                             | 1,293 (0.83)                                              |
| United States of America*             | 56,739 (3.83)                                         | 7056 (0.42)                                         | 2,122 (0.12)                                | 43,737 (2.88)                                  | 20,098 (1.21)                                                     | 5,329 (0.33)                                                           | 19,336 (1.11)                                             |
| USA-American, Indian, Alaskan Native* | 185 (0.94)                                            | 43 (0.20)                                           | 6 (0.03)                                    | 339 (1.67)                                     | 111 (0.54)                                                        | 37 (0.17)                                                              | 75 (0.35)                                                 |
| USA-Asian-Pacific Islander*           | 1,340 (1.66)                                          | 107 (0.11)                                          | 36 (0.04)                                   | 2,058 (2.41)                                   | 1,773 (1.81)                                                      | 925 (0.93)                                                             | 912 (0.89)                                                |
| USA-Black*                            | 7,309 (3.28)                                          | 2718 (1.15)                                         | 267 (0.11)                                  | 5,572 (2.45)                                   | 2,807 (1.19)                                                      | 1,174 (0.49)                                                           | 2,916 (1.18)                                              |
| USA-White*                            | 47,338 (4.11)                                         | 4004 (0.29)                                         | 1,792 (0.13)                                | 35,404 (2.99)                                  | 15,083 (1.16)                                                     | 3,160 (0.25)                                                           | 15,339 (1.11)                                             |
| <b>Asia</b>                           |                                                       |                                                     |                                             |                                                |                                                                   |                                                                        |                                                           |
| Bahrain*                              | 67 (2.24)                                             | 2 (0.07)                                            | 0 (0.00)                                    | 75 (2.52)                                      | 30 (1.03)                                                         | 9 (0.30)                                                               | 8 (0.27)                                                  |
| China*                                | 558 (0.65)                                            | 1 (0.00)                                            | 40 (0.04)                                   | 2,151 (2.41)                                   | 4,621 (4.34)                                                      | 2,262 (2.06)                                                           | 1,636 (1.47)                                              |
| India*                                | 251 (0.82)                                            | 2 (0.01)                                            | 70 (0.20)                                   | 732 (2.32)                                     | 1,081 (3.16)                                                      | 108 (0.32)                                                             | 226 (0.66)                                                |
| Israel                                | 2,077 (5.45)                                          | 49 (0.13)                                           | 45 (0.11)                                   | 1,100 (2.86)                                   | 425 (1.09)                                                        | 68 (0.18)                                                              | 356 (0.89)                                                |
| Japan*                                | 261 (0.50)                                            | 10 (0.01)                                           | 20 (0.03)                                   | 1,362 (2.46)                                   | 653 (1.02)                                                        | 360 (0.53)                                                             | 799 (1.17)                                                |
| Kuwait*                               | 192 (3.21)                                            | 2 (0.03)                                            | 2 (0.04)                                    | 176 (2.94)                                     | 52 (0.90)                                                         | 9 (0.16)                                                               | 21 (0.37)                                                 |
| Philippines*                          | 239 (0.58)                                            | 4 (0.01)                                            | 32 (0.08)                                   | 1,322 (3.25)                                   | 850 (2.05)                                                        | 726 (1.76)                                                             | 615 (1.49)                                                |
| Republic of Korea*                    | 460 (0.43)                                            | 23 (0.02)                                           | 67 (0.05)                                   | 3,100 (2.68)                                   | 1,235 (0.97)                                                      | 2,761 (1.96)                                                           | 1,480 (1.07)                                              |
| Thailand*                             | 141 (0.45)                                            | 19 (0.06)                                           | 24 (0.07)                                   | 828 (2.55)                                     | 594 (1.69)                                                        | 1,003 (2.67)                                                           | 569 (1.54)                                                |
| Turkey*                               | 607 (1.75)                                            | 20 (0.06)                                           | 90 (0.23)                                   | 924 (2.69)                                     | 417 (1.15)                                                        | 93 (0.25)                                                              | 549 (1.39)                                                |
| <b>Europe</b>                         |                                                       |                                                     |                                             |                                                |                                                                   |                                                                        |                                                           |
| Austria                               | 1,223 (3.07)                                          | 6 (0.01)                                            | 44 (0.08)                                   | 1,045 (2.43)                                   | 430 (0.82)                                                        | 140 (0.28)                                                             | 548 (1.02)                                                |
| Belarus                               | 2,509 (4.65)                                          | 0 (0.00)                                            | 121 (0.19)                                  | 1,327 (2.39)                                   | 472 (0.77)                                                        | 139 (0.23)                                                             | 617 (0.98)                                                |
| Bulgaria                              | 1,104 (2.69)                                          | 5 (0.01)                                            | 110 (0.23)                                  | 817 (2.01)                                     | 498 (1.08)                                                        | 166 (0.36)                                                             | 681 (1.40)                                                |
| Croatia                               | 827 (3.75)                                            | 2 (0.01)                                            | 53 (0.20)                                   | 551 (2.45)                                     | 261 (1.05)                                                        | 95 (0.37)                                                              | 348 (1.29)                                                |
| Cyprus                                | 256 (6.03)                                            | 5 (0.11)                                            | 5 (0.10)                                    | 134 (3.05)                                     | 40 (0.85)                                                         | 14 (0.30)                                                              | 38 (0.79)                                                 |
| Czech Republic                        | 1,882 (3.33)                                          | 11 (0.02)                                           | 54 (0.08)                                   | 934 (1.59)                                     | 467 (0.73)                                                        | 128 (0.20)                                                             | 463 (0.71)                                                |
| Denmark                               | 853 (3.30)                                            | 34 (0.10)                                           | 38 (0.11)                                   | 652 (2.40)                                     | 290 (0.94)                                                        | 67 (0.23)                                                              | 308 (0.92)                                                |
| Estonia                               | 312 (4.43)                                            | 2 (0.03)                                            | 16 (0.20)                                   | 168 (2.35)                                     | 59 (0.72)                                                         | 20 (0.25)                                                              | 67 (0.82)                                                 |
| France*                               | 1,390 (4.22)                                          | 78 (0.19)                                           | 68 (0.16)                                   | 923 (2.64)                                     | 463 (1.18)                                                        | 141 (0.38)                                                             | 582 (1.41)                                                |
| Germany*                              | 516 (3.78)                                            | 26 (0.13)                                           | 15 (0.08)                                   | 422 (2.91)                                     | 160 (0.96)                                                        | 52 (0.29)                                                              | 178 (0.95)                                                |
| Iceland                               | 66 (4.08)                                             | 0 (0.00)                                            | 0 (0.00)                                    | 31 (1.89)                                      | 18 (1.05)                                                         | 6 (0.33)                                                               | 19 (1.02)                                                 |
| Ireland                               | 832 (3.52)                                            | 43 (0.15)                                           | 22 (0.08)                                   | 552 (2.24)                                     | 237 (0.89)                                                        | 60 (0.22)                                                              | 225 (0.82)                                                |
| Italy*                                | 840 (5.53)                                            | 93 (0.45)                                           | 35 (0.15)                                   | 473 (2.93)                                     | 226 (1.18)                                                        | 71 (0.37)                                                              | 224 (1.07)                                                |
| Lithuania                             | 692 (3.85)                                            | 3 (0.01)                                            | 27 (0.12)                                   | 450 (2.40)                                     | 142 (0.69)                                                        | 38 (0.19)                                                              | 190 (0.88)                                                |
| Malta                                 | 82 (3.90)                                             | 0 (0.00)                                            | 3 (0.12)                                    | 55 (2.63)                                      | 25 (1.14)                                                         | 3 (0.12)                                                               | 16 (0.69)                                                 |
| Netherlands                           | 3,035 (3.87)                                          | 237 (0.24)                                          | 72 (0.07)                                   | 1,985 (2.36)                                   | 934 (0.99)                                                        | 180 (0.20)                                                             | 1,189 (1.12)                                              |
| Norway                                | 898 (3.85)                                            | 16 (0.06)                                           | 19 (0.06)                                   | 559 (2.32)                                     | 231 (0.87)                                                        | 59 (0.22)                                                              | 243 (0.85)                                                |
| Poland*                               | 230 (3.28)                                            | 0 (0.00)                                            | 12 (0.16)                                   | 120 (1.69)                                     | 56 (0.75)                                                         | 18 (0.24)                                                              | 65 (0.88)                                                 |
| Slovenia                              | 363 (3.53)                                            | 3 (0.02)                                            | 21 (0.15)                                   | 225 (2.17)                                     | 122 (0.98)                                                        | 11 (0.09)                                                              | 122 (0.91)                                                |
| Spain*                                | 1,029 (4.60)                                          | 129 (0.44)                                          | 77 (0.24)                                   | 578 (2.41)                                     | 345 (1.19)                                                        | 110 (0.40)                                                             | 391 (1.25)                                                |
| Switzerland*                          | 557 (4.80)                                            | 61 (0.41)                                           | 13 (0.08)                                   | 299 (2.30)                                     | 162 (1.15)                                                        | 52 (0.39)                                                              | 143 (0.95)                                                |
| United Kingdom*                       | 10,289 (3.54)                                         | 793 (0.23)                                          | 316 (0.09)                                  | 6,921 (2.30)                                   | 3,598 (1.07)                                                      | 834 (0.25)                                                             | 2,595 (0.72)                                              |
| <b>Oceania</b>                        |                                                       |                                                     |                                             |                                                |                                                                   |                                                                        |                                                           |
| Australia                             | 3,754 (3.53)                                          | 168 (0.13)                                          | 74 (0.06)                                   | 3,346 (2.98)                                   | 3,061 (2.43)                                                      | 353 (0.29)                                                             | 1,067 (0.82)                                              |
| New Zealand                           | 594 (2.78)                                            | 19 (0.07)                                           | 9 (0.03)                                    | 683 (3.09)                                     | 338 (1.40)                                                        | 71 (0.29)                                                              | 207 (0.80)                                                |

| Country                               | Melanoma of skin<br>No. of Cases<br>(ASR per 100,000) | Multiple myeloma and<br>immunoproliferative diseases<br>No. of Cases<br>(ASR per 100,000) | Non-Hodgkin lymphoma<br>No. of Cases<br>(ASR per 100,000) | Oesophagus<br>No. of Cases<br>(ASR per 100,000) | Ovary<br>No. of Cases<br>(ASR per 100,000) | Pancreas<br>No. of Cases<br>(ASR per 100,000) | Prostate (male)<br>No. of Cases<br>(ASR per 100,000) | Stomach<br>No. of Cases<br>(ASR per 100,000) |
|---------------------------------------|-------------------------------------------------------|-------------------------------------------------------------------------------------------|-----------------------------------------------------------|-------------------------------------------------|--------------------------------------------|-----------------------------------------------|------------------------------------------------------|----------------------------------------------|
| <b>Africa</b>                         |                                                       |                                                                                           |                                                           |                                                 |                                            |                                               |                                                      |                                              |
| Uganda*                               | 22 (0.18)                                             | 15 (0.15)                                                                                 | 419 (3.37)                                                | 62 (0.65)                                       | 122 (1.98)                                 | 26 (0.23)                                     | 12 (0.20)                                            | 58 (0.52)                                    |
| <b>South America</b>                  |                                                       |                                                                                           |                                                           |                                                 |                                            |                                               |                                                      |                                              |
| Brazil*                               | 126 (1.41)                                            | 9 (0.10)                                                                                  | 199 (2.30)                                                | 12 (0.13)                                       | 106 (2.31)                                 | 22 (0.24)                                     | 18 (0.43)                                            | 122 (1.38)                                   |
| Chile*                                | 22 (1.04)                                             | 1 (0.04)                                                                                  | 45 (2.03)                                                 | 6 (0.25)                                        | 26 (2.33)                                  | 6 (0.24)                                      | 2 (0.17)                                             | 46 (1.95)                                    |
| Colombia*                             | 85 (0.63)                                             | 20 (0.14)                                                                                 | 433 (3.24)                                                | 13 (0.10)                                       | 186 (2.64)                                 | 23 (0.17)                                     | 9 (0.14)                                             | 349 (2.53)                                   |
| Ecuador*                              | 63 (0.61)                                             | 15 (0.15)                                                                                 | 374 (3.65)                                                | 4 (0.04)                                        | 137 (2.59)                                 | 18 (0.18)                                     | 4 (0.08)                                             | 263 (2.53)                                   |
| <b>North America</b>                  |                                                       |                                                                                           |                                                           |                                                 |                                            |                                               |                                                      |                                              |
| Canada*                               | 7,195 (4.90)                                          | 242 (0.15)                                                                                | 4,837 (3.38)                                              | 173 (0.11)                                      | 1,798 (2.52)                               | 450 (0.29)                                    | 78 (0.10)                                            | 799 (0.51)                                   |
| United States of America*             | 96,700 (5.95)                                         | 3,804 (0.21)                                                                              | 57,922 (3.61)                                             | 2,102 (0.12)                                    | 19,783 (2.48)                              | 5,704 (0.33)                                  | 1,729 (0.19)                                         | 9,167 (0.53)                                 |
| USA-American, Indian, Alaskan Native* | 195 (0.94)                                            | 24 (0.11)                                                                                 | 262 (1.25)                                                | 17 (0.08)                                       | 118 (1.17)                                 | 43 (0.20)                                     | 4 (0.04)                                             | 94 (0.44)                                    |
| USA-Asian-Pacific Islander*           | 424 (0.44)                                            | 122 (0.12)                                                                                | 2,257 (2.50)                                              | 59 (0.06)                                       | 1,172 (2.45)                               | 264 (0.26)                                    | 27 (0.05)                                            | 844 (0.83)                                   |
| USA-Black*                            | 531 (0.23)                                            | 1,059 (0.43)                                                                              | 10,238 (4.39)                                             | 201 (0.08)                                      | 2,427 (2.02)                               | 983 (0.40)                                    | 479 (0.40)                                           | 1,742 (0.72)                                 |
| USA-White*                            | 90,107 (7.07)                                         | 2,572 (0.18)                                                                              | 44,350 (3.52)                                             | 1,817 (0.13)                                    | 15,899 (2.56)                              | 4,386 (0.32)                                  | 1,164 (0.16)                                         | 6,428 (0.48)                                 |
| <b>Asia</b>                           |                                                       |                                                                                           |                                                           |                                                 |                                            |                                               |                                                      |                                              |
| Bahrain*                              | 1 (0.04)                                              | 4 (0.14)                                                                                  | 78 (2.59)                                                 | 4 (0.14)                                        | 29 (1.91)                                  | 7 (0.23)                                      | 0 (0.00)                                             | 18 (0.59)                                    |
| China*                                | 122 (0.12)                                            | 70 (0.06)                                                                                 | 1,698 (1.83)                                              | 127 (0.11)                                      | 1,264 (2.59)                               | 248 (0.23)                                    | 12 (0.03)                                            | 1,622 (1.50)                                 |
| India*                                | 27 (0.08)                                             | 28 (0.08)                                                                                 | 517 (1.60)                                                | 177 (0.51)                                      | 318 (1.96)                                 | 66 (0.19)                                     | 5 (0.03)                                             | 494 (1.43)                                   |
| Israel                                | 1,699 (4.27)                                          | 90 (0.22)                                                                                 | 1,952 (4.96)                                              | 33 (0.08)                                       | 372 (1.91)                                 | 115 (0.29)                                    | 11 (0.06)                                            | 359 (0.90)                                   |
| Japan*                                | 146 (0.24)                                            | 40 (0.06)                                                                                 | 921 (1.54)                                                | 50 (0.07)                                       | 932 (3.02)                                 | 196 (0.28)                                    | 8 (0.02)                                             | 1,724 (2.51)                                 |
| Kuwait*                               | 4 (0.07)                                              | 7 (0.13)                                                                                  | 238 (4.02)                                                | 5 (0.09)                                        | 40 (1.33)                                  | 10 (0.17)                                     | 0 (0.00)                                             | 27 (0.48)                                    |
| Philippines*                          | 35 (0.08)                                             | 22 (0.05)                                                                                 | 718 (1.74)                                                | 41 (0.10)                                       | 940 (4.44)                                 | 86 (0.20)                                     | 11 (0.05)                                            | 201 (0.49)                                   |
| Republic of Korea*                    | 191 (0.15)                                            | 123 (0.09)                                                                                | 2,765 (2.27)                                              | 57 (0.04)                                       | 1,891 (3.15)                               | 401 (0.29)                                    | 38 (0.06)                                            | 7,522 (5.30)                                 |
| Thailand*                             | 35 (0.10)                                             | 37 (0.10)                                                                                 | 765 (2.28)                                                | 27 (0.07)                                       | 526 (3.05)                                 | 58 (0.15)                                     | 4 (0.02)                                             | 244 (0.68)                                   |
| Turkey*                               | 249 (0.67)                                            | 66 (0.17)                                                                                 | 792 (2.21)                                                | 85 (0.22)                                       | 411 (2.23)                                 | 95 (0.25)                                     | 17 (0.09)                                            | 490 (1.26)                                   |
| <b>Europe</b>                         |                                                       |                                                                                           |                                                           |                                                 |                                            |                                               |                                                      |                                              |
| Austria                               | 2967 (6.19)                                           | 79 (0.14)                                                                                 | 1,275 (2.78)                                              | 60 (0.11)                                       | 627 (2.59)                                 | 165 (0.31)                                    | 42 (0.15)                                            | 410 (0.75)                                   |
| Belarus                               | 1060 (1.77)                                           | 68 (0.11)                                                                                 | 1,017 (1.79)                                              | 46 (0.07)                                       | 1,221 (4.13)                               | 230 (0.37)                                    | 12 (0.04)                                            | 1,464 (2.35)                                 |
| Bulgaria                              | 670 (1.46)                                            | 37 (0.08)                                                                                 | 713 (1.65)                                                | 45 (0.09)                                       | 1,029 (4.70)                               | 238 (0.50)                                    | 9 (0.04)                                             | 504 (1.06)                                   |
| Croatia                               | 859 (3.42)                                            | 46 (0.18)                                                                                 | 712 (3.03)                                                | 31 (0.11)                                       | 503 (4.03)                                 | 94 (0.35)                                     | 6 (0.05)                                             | 260 (0.98)                                   |
| Cyprus                                | 79 (1.70)                                             | 7 (0.14)                                                                                  | 161 (3.51)                                                | 2 (0.04)                                        | 49 (2.10)                                  | 6 (0.12)                                      | 1 (0.04)                                             | 35 (0.71)                                    |
| Czech Republic                        | 3,009 (4.71)                                          | 68 (0.10)                                                                                 | 1,225 (1.98)                                              | 69 (0.10)                                       | 986 (3.21)                                 | 208 (0.31)                                    | 11 (0.03)                                            | 467 (0.69)                                   |
| Denmark                               | 3,756 (12.50)                                         | 50 (0.14)                                                                                 | 742 (2.53)                                                | 36 (0.11)                                       | 328 (2.25)                                 | 94 (0.27)                                     | 6 (0.03)                                             | 134 (0.41)                                   |
| Estonia                               | 294 (3.76)                                            | 10 (0.12)                                                                                 | 204 (2.73)                                                | 6 (0.07)                                        | 117 (3.02)                                 | 32 (0.37)                                     | 2 (0.05)                                             | 143 (1.73)                                   |
| France*                               | 2,240 (5.94)                                          | 82 (0.20)                                                                                 | 1,114 (3.04)                                              | 49 (0.12)                                       | 378 (2.06)                                 | 154 (0.39)                                    | 13 (0.07)                                            | 209 (0.51)                                   |
| Germany*                              | 1,061 (6.53)                                          | 40 (0.22)                                                                                 | 500 (3.26)                                                | 32 (0.17)                                       | 209 (2.60)                                 | 42 (0.24)                                     | 9 (0.10)                                             | 124 (0.66)                                   |
| Iceland                               | 224 (12.95)                                           | 4 (0.20)                                                                                  | 45 (2.67)                                                 | 1 (0.05)                                        | 17 (1.99)                                  | 1 (0.05)                                      | 0 (0.00)                                             | 11 (0.60)                                    |
| Ireland                               | 1,630 (6.09)                                          | 43 (0.15)                                                                                 | 761 (2.89)                                                | 61 (0.21)                                       | 314 (2.39)                                 | 62 (0.22)                                     | 10 (0.07)                                            | 149 (0.53)                                   |
| Italy*                                | 1,365 (7.10)                                          | 46 (0.21)                                                                                 | 799 (4.30)                                                | 17 (0.09)                                       | 236 (2.44)                                 | 78 (0.39)                                     | 3 (0.03)                                             | 200 (0.92)                                   |
| Lithuania                             | 446 (2.23)                                            | 28 (0.13)                                                                                 | 434 (2.27)                                                | 16 (0.08)                                       | 383 (3.73)                                 | 92 (0.43)                                     | 6 (0.06)                                             | 369 (1.75)                                   |
| Malta                                 | 83 (3.68)                                             | 3 (0.14)                                                                                  | 81 (3.67)                                                 | 1 (0.04)                                        | 30 (2.69)                                  | 4 (0.18)                                      | 1 (0.08)                                             | 10 (0.42)                                    |
| Netherlands                           | 9,367 (9.84)                                          | 154 (0.14)                                                                                | 2,635 (2.92)                                              | 159 (0.15)                                      | 773 (1.72)                                 | 265 (0.25)                                    | 20 (0.04)                                            | 557 (0.54)                                   |
| Norway                                | 2,088 (7.56)                                          | 50 (0.16)                                                                                 | 676 (2.61)                                                | 16 (0.05)                                       | 307 (2.41)                                 | 98 (0.33)                                     | 8 (0.06)                                             | 142 (0.49)                                   |
| Poland*                               | 135 (1.80)                                            | 9 (0.12)                                                                                  | 115 (1.57)                                                | 5 (0.07)                                        | 98 (2.75)                                  | 21 (0.27)                                     | 3 (0.08)                                             | 74 (0.97)                                    |
| Slovenia                              | 811 (6.59)                                            | 14 (0.11)                                                                                 | 288 (2.46)                                                | 13 (0.10)                                       | 156 (2.72)                                 | 47 (0.34)                                     | 3 (0.05)                                             | 136 (1.04)                                   |
| Spain*                                | 1,214 (4.42)                                          | 39 (0.13)                                                                                 | 1,054 (3.88)                                              | 33 (0.10)                                       | 299 (2.26)                                 | 107 (0.35)                                    | 5 (0.04)                                             | 238 (0.79)                                   |
| Switzerland*                          | 1,561 (11.17)                                         | 33 (0.20)                                                                                 | 443 (3.21)                                                | 13 (0.08)                                       | 110 (1.63)                                 | 34 (0.23)                                     | 7 (0.10)                                             | 103 (0.66)                                   |
| United Kingdom*                       | 20,677 (6.21)                                         | 678 (0.18)                                                                                | 8,997 (2.76)                                              | 651 (0.18)                                      | 3,783 (2.29)                               | 840 (0.23)                                    | 118 (0.07)                                           | 1,449 (0.41)                                 |
| <b>Oceania</b>                        |                                                       |                                                                                           |                                                           |                                                 |                                            |                                               |                                                      |                                              |
| Australia                             | 19,427 (15.91)                                        | 219 (0.17)                                                                                | 4,083 (3.42)                                              | 151 (0.11)                                      | 1,263 (2.14)                               | 356 (0.28)                                    | 102 (0.15)                                           | 649 (0.50)                                   |
| New Zealand                           | 3,162 (13.14)                                         | 44 (0.17)                                                                                 | 707 (2.99)                                                | 27 (0.10)                                       | 289 (2.45)                                 | 74 (0.29)                                     | 9 (0.07)                                             | 243 (0.99)                                   |

\*Sub-National

Supplementary Table 3: Number of cases and truncated age-standardized rate (ASR) per 100,000 person-years for 15-39 year old males during the period of 1998-2012 for cancers of the bladder, bone, brain (central nervous system), connective and soft tissue, eye, gallbladder and extrahepatic ducts, Hodgkin lymphoma, Kaposi sarcoma, larynx, leukaemia, lip (oral cavity and pharynx), liver and intrahepatic bile ducts, lung (incl. trachea), melanoma of skin, multiple myeloma and immunoproliferative diseases, Non-Hodgkin lymphoma, oesophagus, pancreas, prostate, and stomach.

| Country                               | Bladder<br>No. of Cases<br>(ASR per 100,000) | Bone<br>No. of Cases<br>(ASR per 100,000) | Brain, central<br>nervous system<br>No. of Cases<br>(ASR per 100,000) | Connective and soft<br>tissue<br>No. of Cases<br>(ASR per 100,000) | Eye<br>No. of Cases<br>(ASR per 100,000) | Gallbladder and<br>extrahepatic ducts<br>No. of Cases<br>(ASR per 100,000) | Hodgkin lymphoma<br>No. of Cases<br>(ASR per 100,000) |
|---------------------------------------|----------------------------------------------|-------------------------------------------|-----------------------------------------------------------------------|--------------------------------------------------------------------|------------------------------------------|----------------------------------------------------------------------------|-------------------------------------------------------|
| <b>Africa</b>                         |                                              |                                           |                                                                       |                                                                    |                                          |                                                                            |                                                       |
| Uganda*                               | 16 (0.23)                                    | 78 (1.19)                                 | 46 (0.72)                                                             | 84 (1.38)                                                          | 100 (1.69)                               | 1 (0.01)                                                                   | 67 (1.10)                                             |
| <b>South America</b>                  |                                              |                                           |                                                                       |                                                                    |                                          |                                                                            |                                                       |
| Brazil*                               | 16 (0.38)                                    | 67 (1.74)                                 | 135 (3.29)                                                            | 53 (1.30)                                                          | 23 (0.55)                                | 6 (0.14)                                                                   | 81 (2.02)                                             |
| Chile*                                | 5 (0.41)                                     | 21 (1.39)                                 | 21 (1.88)                                                             | 8 (0.75)                                                           | 0 (0.00)                                 | 3 (0.24)                                                                   | 18 (1.66)                                             |
| Colombia*                             | 13 (0.20)                                    | 114 (1.89)                                | 191 (3.04)                                                            | 90 (1.44)                                                          | 9 (0.14)                                 | 10 (0.15)                                                                  | 93 (1.51)                                             |
| Ecuador*                              | 15 (0.31)                                    | 65 (1.33)                                 | 143 (2.90)                                                            | 93 (1.90)                                                          | 11 (0.22)                                | 10 (0.20)                                                                  | 43 (0.87)                                             |
| <b>North America</b>                  |                                              |                                           |                                                                       |                                                                    |                                          |                                                                            |                                                       |
| Canada*                               | 498 (0.65)                                   | 766 (1.22)                                | 2,167 (3.12)                                                          | 923 (1.35)                                                         | 111 (0.15)                               | 65 (0.08)                                                                  | 2,584 (3.97)                                          |
| United States of America*             | 7,013 (0.81)                                 | 8,297 (1.15)                              | 24,951 (3.21)                                                         | 10,831 (1.40)                                                      | 1,230 (0.15)                             | 728 (0.08)                                                                 | 29,397 (3.89)                                         |
| USA-American, Indian, Alaskan Native* | 31 (0.29)                                    | 47 (0.46)                                 | 147 (1.40)                                                            | 68 (0.65)                                                          | 6 (0.05)                                 | 3 (0.03)                                                                   | 95 (0.93)                                             |
| USA-Asian-Pacific Islander*           | 182 (0.37)                                   | 328 (0.87)                                | 812 (1.89)                                                            | 375 (0.89)                                                         | 27 (0.06)                                | 39 (0.08)                                                                  | 694 (1.75)                                            |
| USA-Black*                            | 457 (0.39)                                   | 1,022 (0.95)                              | 2,123 (1.94)                                                          | 1,711 (1.57)                                                       | 60 (0.05)                                | 98 (0.08)                                                                  | 3,696 (3.42)                                          |
| USA-White*                            | 6,194 (0.90)                                 | 6,832 (1.21)                              | 21,662 (3.52)                                                         | 8,524 (1.39)                                                       | 1,102 (0.17)                             | 586 (0.08)                                                                 | 24,607 (4.14)                                         |
| <b>Asia</b>                           |                                              |                                           |                                                                       |                                                                    |                                          |                                                                            |                                                       |
| Bahrain*                              | 9 (0.63)                                     | 22 (1.43)                                 | 22 (1.46)                                                             | 12 (0.79)                                                          | 0 (0.00)                                 | 0 (0.00)                                                                   | 36 (2.43)                                             |
| China*                                | 187 (0.37)                                   | 324 (0.80)                                | 887 (2.00)                                                            | 366 (0.79)                                                         | 13 (0.03)                                | 49 (0.09)                                                                  | 277 (0.65)                                            |
| India*                                | 34 (0.19)                                    | 170 (1.12)                                | 268 (1.63)                                                            | 106 (0.66)                                                         | 11 (0.06)                                | 27 (0.15)                                                                  | 148 (0.97)                                            |
| Israel                                | 283 (1.41)                                   | 287 (1.52)                                | 588 (3.01)                                                            | 282 (1.44)                                                         | 28 (0.14)                                | 14 (0.07)                                                                  | 943 (4.87)                                            |
| Japan*                                | 145 (0.44)                                   | 162 (0.67)                                | 457 (1.61)                                                            | 193 (0.67)                                                         | 8 (0.02)                                 | 44 (0.13)                                                                  | 146 (0.54)                                            |
| Kuwait*                               | 18 (0.65)                                    | 31 (0.99)                                 | 35 (1.22)                                                             | 21 (0.71)                                                          | 0 (0.00)                                 | 0 (0.00)                                                                   | 108 (3.72)                                            |
| Philippines*                          | 51 (0.25)                                    | 282 (1.49)                                | 252 (1.27)                                                            | 186 (0.94)                                                         | 9 (0.04)                                 | 14 (0.07)                                                                  | 109 (0.56)                                            |
| Republic of Korea*                    | 356 (0.51)                                   | 501 (0.95)                                | 1,126 (1.88)                                                          | 556 (0.93)                                                         | 31 (0.05)                                | 140 (0.19)                                                                 | 241 (0.44)                                            |
| Thailand*                             | 47 (0.26)                                    | 102 (0.69)                                | 207 (1.26)                                                            | 98 (0.59)                                                          | 21 (0.12)                                | 26 (0.14)                                                                  | 81 (0.51)                                             |
| Turkey*                               | 246 (1.29)                                   | 196 (1.24)                                | 525 (2.90)                                                            | 174 (0.96)                                                         | 11 (0.06)                                | 26 (0.13)                                                                  | 349 (1.98)                                            |
| <b>Europe</b>                         |                                              |                                           |                                                                       |                                                                    |                                          |                                                                            |                                                       |
| Austria                               | 191 (0.75)                                   | 243 (1.28)                                | 758 (3.30)                                                            | 259 (1.14)                                                         | 28 (0.10)                                | 16 (0.06)                                                                  | 648 (3.17)                                            |
| Belarus                               | 230 (0.75)                                   | 272 (1.04)                                | 811 (2.86)                                                            | 320 (1.12)                                                         | 60 (0.20)                                | 26 (0.08)                                                                  | 1,115 (4.08)                                          |
| Bulgaria                              | 263 (1.09)                                   | 213 (1.13)                                | 704 (3.22)                                                            | 218 (0.99)                                                         | 22 (0.10)                                | 22 (0.09)                                                                  | 574 (2.69)                                            |
| Croatia                               | 139 (1.06)                                   | 188 (1.75)                                | 547 (4.57)                                                            | 130 (1.12)                                                         | 18 (0.14)                                | 13 (0.09)                                                                  | 367 (3.25)                                            |
| Cyprus                                | 37 (1.63)                                    | 36 (1.73)                                 | 50 (2.35)                                                             | 29 (1.29)                                                          | 3 (0.13)                                 | 3 (0.14)                                                                   | 116 (5.49)                                            |
| Czech Republic                        | 299 (0.90)                                   | 271 (1.01)                                | 899 (2.93)                                                            | 311 (1.01)                                                         | 44 (0.13)                                | 31 (0.09)                                                                  | 923 (3.15)                                            |
| Denmark                               | 123 (0.76)                                   | 138 (1.13)                                | 391 (2.62)                                                            | 224 (1.57)                                                         | 53 (0.33)                                | 13 (0.08)                                                                  | 458 (3.44)                                            |
| Estonia                               | 32 (0.78)                                    | 36 (1.08)                                 | 117 (3.10)                                                            | 32 (0.85)                                                          | 6 (0.14)                                 | 2 (0.05)                                                                   | 152 (4.22)                                            |
| France*                               | 49 (0.24)                                    | 209 (1.30)                                | 532 (2.92)                                                            | 245 (1.42)                                                         | 36 (0.18)                                | 8 (0.04)                                                                   | 705 (4.20)                                            |
| Germany*                              | 91 (1.07)                                    | 72 (1.16)                                 | 209 (2.68)                                                            | 83 (1.11)                                                          | 3 (0.04)                                 | 9 (0.09)                                                                   | 274 (3.82)                                            |
| Iceland                               | 11 (1.22)                                    | 15 (1.93)                                 | 20 (2.22)                                                             | 11 (1.32)                                                          | 1 (0.10)                                 | 2 (0.23)                                                                   | 36 (4.42)                                             |
| Ireland                               | 118 (0.85)                                   | 115 (1.01)                                | 426 (3.36)                                                            | 116 (0.90)                                                         | 19 (0.14)                                | 11 (0.08)                                                                  | 421 (3.50)                                            |
| Italy*                                | 225 (2.19)                                   | 96 (1.35)                                 | 264 (2.99)                                                            | 101 (1.17)                                                         | 21 (0.20)                                | 8 (0.08)                                                                   | 402 (5.22)                                            |
| Lithuania                             | 87 (0.86)                                    | 93 (1.05)                                 | 319 (3.32)                                                            | 81 (0.85)                                                          | 8 (0.08)                                 | 5 (0.04)                                                                   | 300 (3.33)                                            |
| Malta                                 | 16 (1.34)                                    | 11 (1.08)                                 | 28 (2.49)                                                             | 14 (1.25)                                                          | 1 (0.10)                                 | 2 (0.21)                                                                   | 51 (4.74)                                             |
| Netherlands                           | 599 (1.17)                                   | 442 (1.18)                                | 1,380 (3.00)                                                          | 533 (1.22)                                                         | 85 (0.18)                                | 62 (0.12)                                                                  | 1,645 (4.05)                                          |
| Norway                                | 113 (0.79)                                   | 134 (1.18)                                | 507 (3.93)                                                            | 138 (1.08)                                                         | 23 (0.17)                                | 13 (0.08)                                                                  | 487 (4.03)                                            |
| Poland*                               | 32 (0.81)                                    | 27 (0.76)                                 | 143 (3.88)                                                            | 33 (0.90)                                                          | 3 (0.09)                                 | 5 (0.13)                                                                   | 114 (3.12)                                            |
| Slovenia                              | 36 (0.54)                                    | 50 (0.97)                                 | 145 (2.59)                                                            | 63 (1.10)                                                          | 6 (0.09)                                 | 5 (0.07)                                                                   | 180 (3.32)                                            |
| Spain*                                | 253 (1.67)                                   | 122 (1.17)                                | 335 (2.53)                                                            | 197 (1.59)                                                         | 11 (0.06)                                | 11 (0.07)                                                                  | 566 (4.83)                                            |
| Switzerland*                          | 49 (0.71)                                    | 65 (1.16)                                 | 190 (2.88)                                                            | 75 (1.17)                                                          | 4 (0.05)                                 | 5 (0.07)                                                                   | 279 (4.66)                                            |
| United Kingdom*                       | 589 (0.33)                                   | 1,488 (1.08)                              | 4,543 (2.86)                                                          | 1,726 (1.11)                                                       | 247 (0.15)                               | 96 (0.05)                                                                  | 5,569 (3.78)                                          |
| <b>Oceania</b>                        |                                              |                                           |                                                                       |                                                                    |                                          |                                                                            |                                                       |
| Australia                             | 187 (0.30)                                   | 630 (1.22)                                | 1,784 (3.03)                                                          | 732 (1.27)                                                         | 148 (0.24)                               | 57 (0.09)                                                                  | 1,945 (3.59)                                          |
| New Zealand                           | 60 (0.48)                                    | 139 (1.37)                                | 346 (3.02)                                                            | 137 (1.20)                                                         | 22 (0.19)                                | 7 (0.06)                                                                   | 305 (2.86)                                            |

Supplementary Table 4: Number of cases and truncated age-standardized rate (ASR) per 100,000 person-years for 15-39 year old females during the period of 1998-2012 for cancers of the bladder, bone, brain (central nervous system), connective and soft tissue, corpus uteri, eye, gallbladder and extrahepatic ducts, Hodgkin lymphoma, Kaposi sarcoma, larynx, leukaemia, lip (oral cavity and pharynx), liver and intrahepatic bile ducts, lung (incl. trachea), melanoma of skin, multiple myeloma and immunoproliferative diseases, Non-Hodgkin lymphoma, oesophagus, ovary, pancreas, and stomach.

| Country                               | Bladder                           | Bone                              | Brain, central nervous system     | Connective and soft tissue        | Corpus uteri                      | Eye                               | Gallbladder and extrahepatic ducts |
|---------------------------------------|-----------------------------------|-----------------------------------|-----------------------------------|-----------------------------------|-----------------------------------|-----------------------------------|------------------------------------|
|                                       | No. of Cases<br>(ASR per 100,000)  |
| <b>Africa</b>                         |                                   |                                   |                                   |                                   |                                   |                                   |                                    |
| Uganda*                               | 10 (0.14)                         | 62 (0.78)                         | 22 (0.32)                         | 84 (1.29)                         | 20 (0.40)                         | 150 (2.71)                        | 1 (0.02)                           |
| <b>South America</b>                  |                                   |                                   |                                   |                                   |                                   |                                   |                                    |
| Brazil*                               | 8 (0.18)                          | 39 (0.91)                         | 120 (2.66)                        | 42 (0.95)                         | 34 (0.73)                         | 13 (0.3)                          | 11 (0.24)                          |
| Chile*                                | 1 (0.08)                          | 15 (1.38)                         | 16 (1.44)                         | 9 (0.87)                          | 9 (0.79)                          | 0 (0.00)                          | 12 (1.00)                          |
| Colombia*                             | 12 (0.16)                         | 66 (0.98)                         | 124 (1.75)                        | 94 (1.35)                         | 31 (0.42)                         | 8 (0.11)                          | 14 (0.19)                          |
| Ecuador*                              | 15 (0.27)                         | 40 (0.80)                         | 110 (2.04)                        | 88 (1.65)                         | 32 (0.60)                         | 13 (0.24)                         | 15 (0.28)                          |
| <b>North America</b>                  |                                   |                                   |                                   |                                   |                                   |                                   |                                    |
| Canada*                               | 284 (0.38)                        | 523 (0.85)                        | 1,651 (2.44)                      | 837 (1.25)                        | 1,125 (1.39)                      | 110 (0.15)                        | 67 (0.08)                          |
| United States of America*             | 3,093 (0.37)                      | 5,750 (0.81)                      | 19,151 (2.53)                     | 8,945 (1.18)                      | 19,479 (2.22)                     | 1,132 (0.14)                      | 803 (0.09)                         |
| USA-American, Indian, Alaskan Native* | 18 (0.18)                         | 52 (0.54)                         | 119 (1.22)                        | 57 (0.57)                         | 214 (2.00)                        | 2 (0.02)                          | 9 (0.08)                           |
| USA-Asian-Pacific Islander*           | 69 (0.13)                         | 224 (0.58)                        | 676 (1.53)                        | 336 (0.75)                        | 981 (1.82)                        | 28 (0.06)                         | 64 (0.12)                          |
| USA-Black*                            | 199 (0.16)                        | 768 (0.68)                        | 1,836 (1.58)                      | 1,548 (1.31)                      | 2,205 (1.72)                      | 53 (0.04)                         | 148 (0.11)                         |
| USA-White*                            | 2,735 (0.42)                      | 4,650 (0.85)                      | 16,363 (2.79)                     | 6,879 (1.17)                      | 15,847 (2.31)                     | 1,032 (0.17)                      | 577 (0.08)                         |
| <b>Asia</b>                           |                                   |                                   |                                   |                                   |                                   |                                   |                                    |
| Bahrain*                              | 3 (0.21)                          | 7 (0.46)                          | 15 (1.00)                         | 7 (0.50)                          | 12 (0.81)                         | 1 (0.07)                          | 1 (0.07)                           |
| China*                                | 85 (0.15)                         | 248 (0.58)                        | 758 (1.57)                        | 352 (0.74)                        | 766 (1.32)                        | 25 (0.05)                         | 70 (0.12)                          |
| India*                                | 9 (0.05)                          | 130 (0.87)                        | 196 (1.22)                        | 94 (0.58)                         | 41 (0.24)                         | 7 (0.04)                          | 35 (0.20)                          |
| Israel                                | 76 (0.39)                         | 161 (0.87)                        | 420 (2.19)                        | 235 (1.23)                        | 215 (1.06)                        | 29 (0.15)                         | 9 (0.04)                           |
| Japan*                                | 61 (0.18)                         | 95 (0.38)                         | 297 (1.05)                        | 152 (0.54)                        | 503 (1.43)                        | 4 (0.01)                          | 40 (0.12)                          |
| Kuwait*                               | 1 (0.03)                          | 22 (0.72)                         | 31 (1.03)                         | 20 (0.66)                         | 11 (0.37)                         | 0 (0.00)                          | 1 (0.03)                           |
| Philippines*                          | 24 (0.11)                         | 186 (0.90)                        | 188 (0.89)                        | 176 (0.83)                        | 338 (1.64)                        | 3 (0.01)                          | 23 (0.11)                          |
| Republic of Korea*                    | 108 (0.16)                        | 348 (0.66)                        | 827 (1.41)                        | 418 (0.73)                        | 873 (1.28)                        | 26 (0.04)                         | 160 (0.23)                         |
| Thailand*                             | 16 (0.09)                         | 65 (0.43)                         | 204 (1.21)                        | 93 (0.55)                         | 105 (0.54)                        | 15 (0.08)                         | 29 (0.15)                          |
| Turkey*                               | 72 (0.39)                         | 129 (0.81)                        | 408 (2.30)                        | 163 (0.94)                        | 157 (0.80)                        | 11 (0.06)                         | 23 (0.12)                          |
| <b>Europe</b>                         |                                   |                                   |                                   |                                   |                                   |                                   |                                    |
| Austria                               | 92 (0.37)                         | 179 (0.92)                        | 574 (2.53)                        | 203 (0.93)                        | 215 (0.78)                        | 28 (0.11)                         | 17 (0.06)                          |
| Belarus                               | 74 (0.25)                         | 172 (0.66)                        | 660 (2.31)                        | 290 (1.03)                        | 492 (1.52)                        | 71 (0.23)                         | 10 (0.03)                          |
| Bulgaria                              | 104 (0.46)                        | 128 (0.71)                        | 487 (2.29)                        | 184 (0.87)                        | 291 (1.21)                        | 27 (0.13)                         | 15 (0.06)                          |
| Croatia                               | 63 (0.49)                         | 130 (1.30)                        | 454 (3.95)                        | 116 (0.99)                        | 124 (0.91)                        | 22 (0.18)                         | 22 (0.17)                          |
| Cyprus                                | 15 (0.67)                         | 18 (0.88)                         | 28 (1.18)                         | 36 (1.55)                         | 19 (0.72)                         | 3 (0.11)                          | 0 (0.00)                           |
| Czech Republic                        | 114 (0.36)                        | 154 (0.59)                        | 705 (2.37)                        | 267 (0.92)                        | 354 (1.06)                        | 41 (0.13)                         | 29 (0.09)                          |
| Denmark                               | 41 (0.26)                         | 103 (0.82)                        | 333 (2.42)                        | 271 (1.94)                        | 87 (0.52)                         | 47 (0.31)                         | 12 (0.07)                          |
| Estonia                               | 9 (0.23)                          | 25 (0.73)                         | 88 (2.44)                         | 37 (0.98)                         | 53 (1.25)                         | 2 (0.05)                          | 2 (0.05)                           |
| France*                               | 20 (0.10)                         | 159 (0.97)                        | 392 (2.14)                        | 186 (1.05)                        | 90 (0.43)                         | 24 (0.12)                         | 9 (0.04)                           |
| Germany*                              | 43 (0.50)                         | 66 (1.09)                         | 184 (2.49)                        | 90 (1.21)                         | 55 (0.59)                         | 7 (0.09)                          | 8 (0.08)                           |
| Iceland                               | 5 (0.54)                          | 4 (0.52)                          | 17 (1.98)                         | 8 (0.93)                          | 7 (0.72)                          | 1 (0.15)                          | 0 (0.00)                           |
| Ireland                               | 53 (0.39)                         | 72 (0.62)                         | 286 (2.24)                        | 105 (0.85)                        | 84 (0.58)                         | 27 (0.20)                         | 10 (0.08)                          |
| Italy*                                | 93 (0.96)                         | 65 (0.86)                         | 197 (2.25)                        | 78 (0.93)                         | 102 (0.92)                        | 15 (0.17)                         | 11 (0.10)                          |
| Lithuania                             | 37 (0.35)                         | 64 (0.70)                         | 261 (2.72)                        | 96 (1.03)                         | 126 (1.13)                        | 16 (0.15)                         | 4 (0.04)                           |
| Malta                                 | 3 (0.25)                          | 2 (0.24)                          | 17 (1.59)                         | 11 (1.02)                         | 11 (0.93)                         | 1 (0.08)                          | 0 (0.00)                           |
| Netherlands                           | 266 (0.53)                        | 324 (0.88)                        | 964 (2.18)                        | 471 (1.09)                        | 210 (0.40)                        | 96 (0.20)                         | 43 (0.08)                          |
| Norway                                | 34 (0.25)                         | 92 (0.85)                         | 342 (2.70)                        | 120 (1.01)                        | 138 (0.92)                        | 34 (0.27)                         | 16 (0.11)                          |
| Poland*                               | 13 (0.36)                         | 29 (0.87)                         | 103 (2.95)                        | 34 (0.97)                         | 34 (0.92)                         | 5 (0.13)                          | 4 (0.12)                           |
| Slovenia                              | 11 (0.17)                         | 42 (0.88)                         | 97 (1.70)                         | 44 (0.79)                         | 43 (0.68)                         | 9 (0.15)                          | 2 (0.03)                           |
| Spain*                                | 84 (0.60)                         | 80 (0.75)                         | 254 (2.13)                        | 127 (1.04)                        | 134 (0.89)                        | 18 (0.13)                         | 10 (0.06)                          |
| Switzerland*                          | 18 (0.24)                         | 61 (1.05)                         | 129 (1.96)                        | 54 (0.86)                         | 63 (0.77)                         | 7 (0.11)                          | 4 (0.05)                           |
| United Kingdom*                       | 336 (0.19)                        | 989 (0.72)                        | 3,070 (1.94)                      | 1,408 (0.91)                      | 1,187 (0.64)                      | 258 (0.15)                        | 84 (0.05)                          |
| <b>Oceania</b>                        |                                   |                                   |                                   |                                   |                                   |                                   |                                    |
| Australia                             | 109 (0.17)                        | 400 (0.77)                        | 1,293 (2.23)                      | 597 (1.06)                        | 681 (1.01)                        | 135 (0.22)                        | 44 (0.07)                          |
| New Zealand                           | 31 (0.24)                         | 107 (1.02)                        | 218 (1.90)                        | 126 (1.13)                        | 209 (1.54)                        | 26 (0.21)                         | 10 (0.07)                          |

| Country                               | Hodgkin lymphoma<br>No. of Cases<br>(ASR per 100,000) | Kaposi sarcoma<br>No. of Cases<br>(ASR per 100,000) | Larynx<br>No. of Cases<br>(ASR per 100,000) | Leukaemia<br>No. of Cases<br>(ASR per 100,000) | Lip, oral cavity and pharynx<br>No. of Cases<br>(ASR per 100,000) | Liver and intrahepatic bile ducts<br>No. of Cases<br>(ASR per 100,000) | Lung (incl. trachea)<br>No. of Cases<br>(ASR per 100,000) |
|---------------------------------------|-------------------------------------------------------|-----------------------------------------------------|---------------------------------------------|------------------------------------------------|-------------------------------------------------------------------|------------------------------------------------------------------------|-----------------------------------------------------------|
| <b>Africa</b>                         |                                                       |                                                     |                                             |                                                |                                                                   |                                                                        |                                                           |
| Uganda*                               | 66 (1.00)                                             | 1,508 (24.17)                                       | 6 (0.09)                                    | 68 (0.99)                                      | 94 (1.44)                                                         | 111 (1.81)                                                             | 17 (0.29)                                                 |
| <b>South America</b>                  |                                                       |                                                     |                                             |                                                |                                                                   |                                                                        |                                                           |
| Brazil*                               | 87 (1.99)                                             | 1 (0.02)                                            | 2 (0.04)                                    | 106 (2.37)                                     | 49 (1.09)                                                         | 9 (0.19)                                                               | 24 (0.51)                                                 |
| Chile*                                | 12 (1.09)                                             | 1 (0.10)                                            | 0 (0.00)                                    | 27 (2.56)                                      | 4 (0.37)                                                          | 2 (0.18)                                                               | 1 (0.08)                                                  |
| Colombia*                             | 91 (1.33)                                             | 8 (0.11)                                            | 3 (0.04)                                    | 206 (3.03)                                     | 54 (0.75)                                                         | 17 (0.24)                                                              | 33 (0.45)                                                 |
| Ecuador*                              | 37 (0.71)                                             | 3 (0.06)                                            | 2 (0.04)                                    | 168 (3.23)                                     | 29 (0.53)                                                         | 20 (0.37)                                                              | 29 (0.53)                                                 |
| <b>North America</b>                  |                                                       |                                                     |                                             |                                                |                                                                   |                                                                        |                                                           |
| Canada*                               | 2,402 (3.85)                                          | 14 (0.02)                                           | 36 (0.05)                                   | 1,438 (2.13)                                   | 821 (1.14)                                                        | 131 (0.19)                                                             | 712 (0.91)                                                |
| United States of America*             | 27,342 (3.77)                                         | 364 (0.04)                                          | 782 (0.09)                                  | 18,388 (2.43)                                  | 8,633 (1.07)                                                      | 1,931 (0.24)                                                           | 9,982 (1.14)                                              |
| USA-American, Indian, Alaskan Native* | 90 (0.96)                                             | 1 (0.01)                                            | 5 (0.05)                                    | 154 (1.54)                                     | 51 (0.51)                                                         | 17 (0.16)                                                              | 42 (0.40)                                                 |
| USA-Asian-Pacific Islander*           | 646 (1.57)                                            | 4 (0.01)                                            | 14 (0.03)                                   | 860 (1.95)                                     | 735 (1.47)                                                        | 200 (0.41)                                                             | 464 (0.87)                                                |
| USA-Black*                            | 3,613 (3.17)                                          | 224 (0.18)                                          | 94 (0.07)                                   | 2,522 (2.14)                                   | 1,284 (1.06)                                                      | 379 (0.31)                                                             | 1,441 (1.11)                                              |
| USA-White*                            | 22,731 (4.07)                                         | 127 (0.02)                                          | 662 (0.10)                                  | 14,711 (2.52)                                  | 6,411 (1.02)                                                      | 1,319 (0.22)                                                           | 7,985 (1.17)                                              |
| <b>Asia</b>                           |                                                       |                                                     |                                             |                                                |                                                                   |                                                                        |                                                           |
| Bahrain*                              | 31 (2.06)                                             | 1 (0.07)                                            | 0 (0.00)                                    | 36 (2.43)                                      | 11 (0.74)                                                         | 5 (0.33)                                                               | 3 (0.21)                                                  |
| China*                                | 281 (0.66)                                            | 0 (0.00)                                            | 8 (0.01)                                    | 937 (2.03)                                     | 1,625 (2.97)                                                      | 423 (0.76)                                                             | 705 (1.22)                                                |
| India*                                | 103 (0.66)                                            | 0 (0.00)                                            | 23 (0.13)                                   | 305 (1.93)                                     | 311 (1.83)                                                        | 33 (0.20)                                                              | 88 (0.52)                                                 |
| Israel                                | 1,134 (6.05)                                          | 10 (0.05)                                           | 15 (0.08)                                   | 441 (2.29)                                     | 175 (0.91)                                                        | 27 (0.14)                                                              | 171 (0.85)                                                |
| Japan*                                | 115 (0.45)                                            | 0 (0.00)                                            | 4 (0.01)                                    | 567 (2.01)                                     | 300 (0.94)                                                        | 91 (0.27)                                                              | 314 (0.91)                                                |
| Kuwait*                               | 84 (2.74)                                             | 0 (0.00)                                            | 0 (0.00)                                    | 70 (2.29)                                      | 22 (0.73)                                                         | 3 (0.11)                                                               | 9 (0.31)                                                  |
| Philippines*                          | 130 (0.59)                                            | 0 (0.00)                                            | 12 (0.06)                                   | 634 (3.01)                                     | 353 (1.67)                                                        | 174 (0.83)                                                             | 235 (1.12)                                                |
| Republic of Korea*                    | 219 (0.42)                                            | 5 (0.01)                                            | 16 (0.02)                                   | 1,327 (2.35)                                   | 524 (0.85)                                                        | 558 (0.82)                                                             | 717 (1.05)                                                |
| Thailand*                             | 60 (0.38)                                             | 3 (0.02)                                            | 6 (0.04)                                    | 403 (2.44)                                     | 254 (1.44)                                                        | 210 (1.11)                                                             | 237 (1.26)                                                |
| Turkey*                               | 258 (1.52)                                            | 5 (0.03)                                            | 12 (0.06)                                   | 408 (2.38)                                     | 172 (0.97)                                                        | 42 (0.24)                                                              | 129 (0.67)                                                |
| <b>Europe</b>                         |                                                       |                                                     |                                             |                                                |                                                                   |                                                                        |                                                           |
| Austria                               | 575 (2.97)                                            | 0 (0.00)                                            | 11 (0.05)                                   | 428 (1.97)                                     | 155 (0.62)                                                        | 56 (0.22)                                                              | 255 (0.96)                                                |
| Belarus                               | 1,394 (5.23)                                          | 0 (0.00)                                            | 22 (0.07)                                   | 583 (2.10)                                     | 156 (0.53)                                                        | 59 (0.20)                                                              | 181 (0.60)                                                |
| Bulgaria                              | 530 (2.70)                                            | 2 (0.01)                                            | 20 (0.08)                                   | 319 (1.62)                                     | 179 (0.80)                                                        | 52 (0.23)                                                              | 224 (0.95)                                                |
| Croatia                               | 460 (4.27)                                            | 0 (0.00)                                            | 7 (0.06)                                    | 247 (2.21)                                     | 94 (0.79)                                                         | 42 (0.34)                                                              | 129 (0.98)                                                |
| Cyprus                                | 140 (6.60)                                            | 0 (0.00)                                            | 2 (0.07)                                    | 61 (2.76)                                      | 19 (0.77)                                                         | 4 (0.15)                                                               | 21 (0.84)                                                 |
| Czech Republic                        | 959 (3.52)                                            | 2 (0.01)                                            | 7 (0.02)                                    | 404 (1.42)                                     | 178 (0.58)                                                        | 56 (0.18)                                                              | 191 (0.59)                                                |
| Denmark                               | 395 (3.15)                                            | 7 (0.04)                                            | 18 (0.11)                                   | 265 (1.94)                                     | 134 (0.91)                                                        | 28 (0.19)                                                              | 165 (1.01)                                                |
| Estonia                               | 160 (4.66)                                            | 0 (0.00)                                            | 5 (0.14)                                    | 74 (2.12)                                      | 23 (0.57)                                                         | 10 (0.25)                                                              | 25 (0.61)                                                 |
| France*                               | 685 (4.25)                                            | 7 (0.05)                                            | 15 (0.07)                                   | 383 (2.19)                                     | 177 (0.94)                                                        | 54 (0.30)                                                              | 225 (1.09)                                                |
| Germany*                              | 242 (3.74)                                            | 2 (0.02)                                            | 4 (0.04)                                    | 183 (2.50)                                     | 63 (0.75)                                                         | 26 (0.31)                                                              | 96 (1.03)                                                 |
| Iceland                               | 30 (3.72)                                             | 0 (0.00)                                            | 0 (0.00)                                    | 16 (1.95)                                      | 7 (0.84)                                                          | 1 (0.10)                                                               | 10 (1.06)                                                 |
| Ireland                               | 411 (3.54)                                            | 7 (0.05)                                            | 4 (0.03)                                    | 252 (2.06)                                     | 99 (0.74)                                                         | 22 (0.18)                                                              | 102 (0.75)                                                |
| Italy*                                | 438 (5.85)                                            | 6 (0.06)                                            | 6 (0.06)                                    | 196 (2.47)                                     | 99 (1.14)                                                         | 15 (0.15)                                                              | 94 (0.91)                                                 |
| Lithuania                             | 392 (4.38)                                            | 0 (0.00)                                            | 3 (0.03)                                    | 200 (2.11)                                     | 47 (0.48)                                                         | 19 (0.19)                                                              | 73 (0.69)                                                 |
| Malta                                 | 31 (3.02)                                             | 0 (0.00)                                            | 2 (0.17)                                    | 17 (1.59)                                      | 9 (0.89)                                                          | 3 (0.25)                                                               | 7 (0.60)                                                  |
| Netherlands                           | 1,390 (3.69)                                          | 34 (0.08)                                           | 17 (0.03)                                   | 872 (2.07)                                     | 416 (0.91)                                                        | 69 (0.16)                                                              | 650 (1.24)                                                |
| Norway                                | 411 (3.66)                                            | 4 (0.03)                                            | 10 (0.07)                                   | 230 (1.94)                                     | 109 (0.85)                                                        | 26 (0.21)                                                              | 125 (0.87)                                                |
| Poland*                               | 116 (3.45)                                            | 0 (0.00)                                            | 2 (0.06)                                    | 46 (1.32)                                      | 18 (0.51)                                                         | 8 (0.22)                                                               | 19 (0.52)                                                 |
| Slovenia                              | 183 (3.75)                                            | 0 (0.00)                                            | 2 (0.04)                                    | 92 (1.76)                                      | 49 (0.85)                                                         | 4 (0.07)                                                               | 51 (0.79)                                                 |
| Spain*                                | 463 (4.35)                                            | 13 (0.09)                                           | 9 (0.06)                                    | 260 (2.24)                                     | 92 (0.73)                                                         | 31 (0.23)                                                              | 159 (1.05)                                                |
| Switzerland*                          | 278 (4.96)                                            | 19 (0.28)                                           | 3 (0.03)                                    | 106 (1.60)                                     | 71 (1.00)                                                         | 17 (0.26)                                                              | 79 (1.07)                                                 |
| United Kingdom*                       | 4,720 (3.30)                                          | 149 (0.09)                                          | 118 (0.07)                                  | 2,910 (1.93)                                   | 1,603 (0.96)                                                      | 307 (0.19)                                                             | 1,263 (0.70)                                              |
| <b>Oceania</b>                        |                                                       |                                                     |                                             |                                                |                                                                   |                                                                        |                                                           |
| Australia                             | 1,809 (3.47)                                          | 0 (0.00)                                            | 16 (0.02)                                   | 1,384 (2.45)                                   | 902 (1.46)                                                        | 132 (0.22)                                                             | 521 (0.80)                                                |
| New Zealand                           | 289 (2.71)                                            | 1 (0.01)                                            | 3 (0.02)                                    | 304 (2.7)                                      | 145 (1.20)                                                        | 23 (0.19)                                                              | 133 (1.01)                                                |

| Country                               | Melanoma of skin<br>No. of Cases<br>(ASR per 100,000) | Multiple myeloma and<br>immunoproliferative diseases<br>No. of Cases<br>(ASR per 100,000) | Non-Hodgkin lymphoma<br>No. of Cases<br>(ASR per 100,000) | Oesophagus<br>No. of Cases<br>(ASR per 100,000) | Ovary<br>No. of Cases<br>(ASR per 100,000) | Pancreas<br>No. of Cases<br>(ASR per 100,000) | Stomach<br>No. of Cases<br>(ASR per 100,000) |
|---------------------------------------|-------------------------------------------------------|-------------------------------------------------------------------------------------------|-----------------------------------------------------------|-------------------------------------------------|--------------------------------------------|-----------------------------------------------|----------------------------------------------|
| <b>Africa</b>                         |                                                       |                                                                                           |                                                           |                                                 |                                            |                                               |                                              |
| Uganda*                               | 17 (0.28)                                             | 4 (0.07)                                                                                  | 196 (3.17)                                                | 18 (0.33)                                       | 122 (1.98)                                 | 8 (0.13)                                      | 21 (0.37)                                    |
| <b>South America</b>                  |                                                       |                                                                                           |                                                           |                                                 |                                            |                                               |                                              |
| Brazil*                               | 89 (1.88)                                             | 3 (0.07)                                                                                  | 83 (1.83)                                                 | 3 (0.07)                                        | 106 (2.31)                                 | 13 (0.27)                                     | 69 (1.49)                                    |
| Chile*                                | 16 (1.49)                                             | 0 (0.00)                                                                                  | 15 (1.34)                                                 | 1 (0.10)                                        | 26 (2.33)                                  | 3 (0.25)                                      | 20 (1.73)                                    |
| Colombia*                             | 58 (0.82)                                             | 7 (0.10)                                                                                  | 188 (2.66)                                                | 6 (0.08)                                        | 186 (2.64)                                 | 15 (0.21)                                     | 178 (2.44)                                   |
| Ecuador*                              | 34 (0.62)                                             | 5 (0.09)                                                                                  | 166 (3.13)                                                | 2 (0.04)                                        | 137 (2.59)                                 | 9 (0.17)                                      | 163 (2.98)                                   |
| <b>North America</b>                  |                                                       |                                                                                           |                                                           |                                                 |                                            |                                               |                                              |
| Canada*                               | 4,451 (6.13)                                          | 103 (0.12)                                                                                | 2,001 (2.80)                                              | 36 (0.05)                                       | 1,798 (2.52)                               | 213 (0.29)                                    | 401 (0.52)                                   |
| United States of America*             | 60,522 (7.57)                                         | 1,516 (0.17)                                                                              | 23,039 (2.89)                                             | 411 (0.05)                                      | 19,783 (2.48)                              | 2,792 (0.33)                                  | 4,351 (0.51)                                 |
| USA-American, Indian, Alaskan Native* | 121 (1.22)                                            | 10 (0.10)                                                                                 | 113 (1.11)                                                | 5 (0.05)                                        | 118 (1.17)                                 | 24 (0.23)                                     | 48 (0.45)                                    |
| USA-Asian-Pacific Islander*           | 280 (0.57)                                            | 52 (0.10)                                                                                 | 1,021 (2.19)                                              | 13 (0.02)                                       | 1,172 (2.45)                               | 128 (0.25)                                    | 486 (0.92)                                   |
| USA-Black*                            | 330 (0.27)                                            | 515 (0.39)                                                                                | 4,273 (3.51)                                              | 72 (0.05)                                       | 2,427 (2.02)                               | 530 (0.42)                                    | 832 (0.65)                                   |
| USA-White*                            | 56,306 (9.10)                                         | 927 (0.13)                                                                                | 17,273 (2.80)                                             | 319 (0.05)                                      | 15,899 (2.56)                              | 2,093 (0.32)                                  | 2,963 (0.45)                                 |
| <b>Asia</b>                           |                                                       |                                                                                           |                                                           |                                                 |                                            |                                               |                                              |
| Bahrain*                              | 1 (0.08)                                              | 2 (0.13)                                                                                  | 30 (2.00)                                                 | 1 (0.07)                                        | 29 (1.91)                                  | 3 (0.20)                                      | 13 (0.85)                                    |
| China*                                | 71 (0.14)                                             | 27 (0.05)                                                                                 | 810 (1.68)                                                | 20 (0.04)                                       | 1,264 (2.59)                               | 115 (0.21)                                    | 928 (1.65)                                   |
| India*                                | 17 (0.10)                                             | 17 (0.10)                                                                                 | 193 (1.19)                                                | 97 (0.56)                                       | 318 (1.96)                                 | 24 (0.14)                                     | 246 (1.43)                                   |
| Israel                                | 953 (4.82)                                            | 27 (0.13)                                                                                 | 865 (4.40)                                                | 11 (0.05)                                       | 372 (1.91)                                 | 53 (0.27)                                     | 184 (0.92)                                   |
| Japan*                                | 85 (0.27)                                             | 15 (0.04)                                                                                 | 391 (1.26)                                                | 22 (0.06)                                       | 932 (3.02)                                 | 89 (0.26)                                     | 894 (2.57)                                   |
| Kuwait*                               | 3 (0.11)                                              | 2 (0.07)                                                                                  | 76 (2.50)                                                 | 1 (0.03)                                        | 40 (1.33)                                  | 5 (0.16)                                      | 17 (0.57)                                    |
| Philippines*                          | 18 (0.08)                                             | 11 (0.06)                                                                                 | 314 (1.47)                                                | 16 (0.08)                                       | 940 (4.44)                                 | 40 (0.19)                                     | 97 (0.47)                                    |
| Republic of Korea*                    | 101 (0.16)                                            | 43 (0.07)                                                                                 | 1,219 (2.02)                                              | 26 (0.04)                                       | 1,891 (3.15)                               | 163 (0.25)                                    | 3,976 (5.71)                                 |
| Thailand*                             | 24 (0.14)                                             | 13 (0.07)                                                                                 | 329 (1.93)                                                | 8 (0.04)                                        | 526 (3.05)                                 | 25 (0.13)                                     | 149 (0.81)                                   |
| Turkey*                               | 115 (0.62)                                            | 26 (0.14)                                                                                 | 336 (1.90)                                                | 43 (0.22)                                       | 411 (2.23)                                 | 46 (0.25)                                     | 237 (1.24)                                   |
| <b>Europe</b>                         |                                                       |                                                                                           |                                                           |                                                 |                                            |                                               |                                              |
| Austria                               | 1,726 (7.28)                                          | 33 (0.12)                                                                                 | 529 (2.31)                                                | 15 (0.05)                                       | 627 (2.59)                                 | 82 (0.32)                                     | 216 (0.80)                                   |
| Belarus                               | 635 (2.12)                                            | 23 (0.07)                                                                                 | 456 (1.59)                                                | 8 (0.03)                                        | 1,221 (4.13)                               | 78 (0.25)                                     | 716 (2.29)                                   |
| Bulgaria                              | 359 (1.58)                                            | 15 (0.06)                                                                                 | 307 (1.43)                                                | 11 (0.05)                                       | 1,029 (4.70)                               | 77 (0.34)                                     | 255 (1.09)                                   |
| Croatia                               | 477 (3.81)                                            | 25 (0.19)                                                                                 | 334 (2.84)                                                | 7 (0.05)                                        | 503 (4.03)                                 | 40 (0.31)                                     | 115 (0.89)                                   |
| Cyprus                                | 51 (2.08)                                             | 2 (0.09)                                                                                  | 70 (2.96)                                                 | 0 (0.00)                                        | 49 (2.10)                                  | 1 (0.04)                                      | 18 (0.71)                                    |
| Czech Republic                        | 1,811 (5.85)                                          | 23 (0.07)                                                                                 | 498 (1.62)                                                | 9 (0.03)                                        | 986 (3.21)                                 | 92 (0.29)                                     | 242 (0.73)                                   |
| Denmark                               | 2,564 (17.36)                                         | 23 (0.13)                                                                                 | 295 (2.05)                                                | 13 (0.08)                                       | 328 (2.25)                                 | 43 (0.26)                                     | 63 (0.39)                                    |
| Estonia                               | 195 (5.11)                                            | 3 (0.08)                                                                                  | 81 (2.19)                                                 | 1 (0.02)                                        | 117 (3.02)                                 | 9 (0.21)                                      | 70 (1.72)                                    |
| France*                               | 1,392 (7.35)                                          | 37 (0.18)                                                                                 | 448 (2.48)                                                | 8 (0.04)                                        | 378 (2.06)                                 | 75 (0.40)                                     | 94 (0.45)                                    |
| Germany*                              | 667 (8.38)                                            | 16 (0.18)                                                                                 | 193 (2.52)                                                | 5 (0.05)                                        | 209 (2.60)                                 | 14 (0.17)                                     | 58 (0.62)                                    |
| Iceland                               | 178 (20.92)                                           | 2 (0.21)                                                                                  | 15 (1.73)                                                 | 0 (0.00)                                        | 17 (1.99)                                  | 0 (0.00)                                      | 5 (0.57)                                     |
| Ireland                               | 1,076 (8.05)                                          | 18 (0.13)                                                                                 | 306 (2.35)                                                | 17 (0.12)                                       | 314 (2.39)                                 | 21 (0.15)                                     | 70 (0.50)                                    |
| Italy*                                | 821 (8.72)                                            | 17 (0.16)                                                                                 | 336 (3.64)                                                | 5 (0.05)                                        | 236 (2.44)                                 | 36 (0.41)                                     | 98 (0.93)                                    |
| Lithuania                             | 260 (2.58)                                            | 11 (0.10)                                                                                 | 163 (1.69)                                                | 2 (0.02)                                        | 383 (3.73)                                 | 36 (0.34)                                     | 187 (1.77)                                   |
| Malta                                 | 48 (4.33)                                             | 1 (0.10)                                                                                  | 32 (3.06)                                                 | 0 (0.00)                                        | 30 (2.69)                                  | 2 (0.21)                                      | 5 (0.42)                                     |
| Netherlands                           | 6,095 (13.03)                                         | 54 (0.10)                                                                                 | 988 (2.23)                                                | 40 (0.08)                                       | 773 (1.72)                                 | 143 (0.29)                                    | 262 (0.53)                                   |
| Norway                                | 1,356 (10.10)                                         | 12 (0.08)                                                                                 | 273 (2.16)                                                | 4 (0.03)                                        | 307 (2.41)                                 | 52 (0.36)                                     | 69 (0.49)                                    |
| Poland*                               | 84 (2.32)                                             | 2 (0.06)                                                                                  | 42 (1.17)                                                 | 1 (0.03)                                        | 98 (2.75)                                  | 6 (0.16)                                      | 36 (0.98)                                    |
| Slovenia                              | 497 (8.35)                                            | 5 (0.07)                                                                                  | 122 (2.14)                                                | 2 (0.03)                                        | 156 (2.72)                                 | 16 (0.23)                                     | 64 (0.99)                                    |
| Spain*                                | 756 (5.65)                                            | 17 (0.11)                                                                                 | 415 (3.16)                                                | 4 (0.02)                                        | 299 (2.26)                                 | 47 (0.33)                                     | 113 (0.79)                                   |
| Switzerland*                          | 960 (13.76)                                           | 18 (0.21)                                                                                 | 166 (2.39)                                                | 4 (0.05)                                        | 110 (1.63)                                 | 18 (0.25)                                     | 50 (0.65)                                    |
| United Kingdom*                       | 13,376 (8.05)                                         | 264 (0.14)                                                                                | 3,564 (2.18)                                              | 176 (0.09)                                      | 3,783 (2.29)                               | 404 (0.23)                                    | 681 (0.38)                                   |
| <b>Oceania</b>                        |                                                       |                                                                                           |                                                           |                                                 |                                            |                                               |                                              |
| Australia                             | 10,688 (17.58)                                        | 76 (0.12)                                                                                 | 1,600 (2.66)                                              | 38 (0.06)                                       | 1,263 (2.14)                               | 164 (0.26)                                    | 310 (0.48)                                   |
| New Zealand                           | 1,935 (15.76)                                         | 11 (0.08)                                                                                 | 288 (2.37)                                                | 9 (0.07)                                        | 289 (2.45)                                 | 36 (0.29)                                     | 124 (0.98)                                   |

\*Sub-National

Supplementary Table 5: Annual average percentage change (AAPC) for cancers occurring among 15-39 year olds during the period of 1998-2012 for each country, for all cancers excluding non-melanoma skin cancer (NMSC) and each cancer site.<sup>†</sup>

| Country                               | All cancers excl. NMSC | Bladder                    | Bone                       | Brain, central nervous system | Breast (female only)               | Cervix uteri (female only) |
|---------------------------------------|------------------------|----------------------------|----------------------------|-------------------------------|------------------------------------|----------------------------|
| <b>Africa</b>                         |                        |                            |                            |                               |                                    |                            |
| Uganda*                               | -0.26 (-1.18, 0.68)    | -1.12 (-9.02, 7.47)        | 5.41 (2.49, 8.41)          | 3.62 (-1.64, 9.16)            | 1.01 (-3.44, 5.66)                 | 0.29 (-2.27, 2.91)         |
| <b>South America</b>                  |                        |                            |                            |                               |                                    |                            |
| Brazil*                               | -0.66 (-1.85, 0.55)    | -5.24 (-11.39, 1.35)       | -1.12 (-7.67, 5.88)        | -3.22 (-6.08, -0.27)          | 0.19 (-1.67, 2.09)                 | -5.16 (-8.02, -2.22)       |
| Chile*                                | 0.58 (-1.18, 2.37)     | 1.06 (-7.89, 10.87)        | 2.80 (-5.28, 11.57)        | 5.11 (-2.00, 12.73)           | -3.30 (-9.14, 2.92)                | -0.91 (-4.83, 3.17)        |
| Colombia*                             | 0.19 (-0.56, 0.95)     | -2.83 (-7.20, 1.74)        | 0.00 (-3.74, 3.89)         | -0.76 (-2.98, 1.51)           | 1.42 (-0.10, 2.97)                 | -2.38 (-3.68, -1.06)       |
| Ecuador*                              | 3.34 (2.24, 4.45)      | 1.39 (-5.48, 8.77)         | -0.31 (-5.30, 4.94)        | 5.46 (1.67, 9.39)             | 3.12 (-0.40, 6.77)                 | 3.27 (-0.00, 6.64)         |
| <b>North America</b>                  |                        |                            |                            |                               |                                    |                            |
| Canada*                               | 1.27 (1.06, 1.49)      | 0.80 (-1.24, 2.88)         | 0.02 (-0.96, 1.01)         | 0.66 (-0.14, 1.47)            | 0.95 (0.50, 1.40)                  | -0.45 (-1.14, 0.25)        |
| United States of America*             | 0.83 (0.64, 1.02)      | -2.03 (-2.46, -1.59)       | -0.42 (-1.05, 0.20)        | -0.16 (-0.39, 0.07)           | -0.05 (-0.17, 0.06)                | -1.86 (-2.14, -1.58)       |
| USA-American, Indian, Alaskan Native* | 0.30 (-0.47, 1.08)     | -3.91 (-9.38, 1.89)        | -0.14 (-3.31, 3.13)        | -1.19 (-4.12, 1.83)           | -0.35 (-1.73, 1.04)                | -2.49 (-4.98, 0.07)        |
| USA-Asian-Pacific Islander*           | 1.36 (1.04, 1.67)      | -1.15 (-2.72, 0.45)        | 1.50 (-0.76, 3.81)         | 0.58 (-0.66, 1.84)            | 0.47 (-0.03, 0.98)                 | -0.59 (-1.67, 0.50)        |
| USA-Black*                            | 0.38 (0.21, 0.55)      | -1.68 (-3.09, -0.25)       | -0.88 (-2.02, 0.26)        | 0.69 (0.08, 1.30)             | -0.09 (-0.30, 0.13)                | -2.45 (-3.11, -1.78)       |
| USA-White*                            | 0.98 (0.77, 1.19)      | -1.94 (-2.42, -1.47)       | -0.34 (-0.99, 0.31)        | -0.12 (-0.38, 0.14)           | -0.04 (-0.18, 0.11)                | -1.63 (-1.95, -1.31)       |
| <b>Asia</b>                           |                        |                            |                            |                               |                                    |                            |
| Bahrain*                              | -0.82 (-2.92, 1.33)    | -2.79 (-7.08, 1.68)        | -3.32 (-10.74, 4.72)       | 2.08 (-3.53, 8.01)            | -2.58 (-5.27, 0.20)                | -6.48 (-12.99, 0.51)       |
| China*                                | 1.51 (0.93, 2.09)      | -5.63 (-9.37, -1.73)       | -0.05 (-1.74, 1.67)        | -0.73 (-1.69, 0.23)           | 1.42 (0.56, 2.29)                  | 3.73 (2.26, 5.23)          |
| India*                                | 0.27 (-0.25, 0.80)     | 1.81 (-4.05, 8.02)         | 0.30 (-2.70, 3.39)         | -1.27 (-3.22, 0.73)           | -0.69 (-2.53, 1.20)                | -7.97 (-9.95, -5.94)       |
| Israel                                | 0.00 (-0.35, 0.36)     | -2.58 (-4.30, -0.82)       | -1.08 (-3.49, 1.40)        | 0.97 (-0.35, 2.32)            | 0.31 (-0.64, 1.27)                 | 0.21 (-1.32, 1.77)         |
| Japan*                                | 2.88 (2.27, 3.49)      | 3.52 (-0.00, 7.16)         | 2.12 (-0.75, 5.07)         | 2.34 (-0.19, 4.93)            | 2.17 (1.13, 3.23)                  | 4.96 (3.52, 6.43)          |
| Kuwait*                               | 1.08 (0.09, 2.08)      | -7.65 (-14.40, -0.38)      | 0.10 (-5.75, 6.32)         | -2.09 (-8.19, 4.41)           | -0.72 (-3.72, 2.38)                | -1.59 (-7.77, 5.01)        |
| Philippines*                          | -1.89 (-2.43, -1.34)   | -0.13 (-4.89, 4.86)        | -3.29 (-5.56, -0.98)       | -3.79 (-6.07, -1.46)          | -1.00 (-1.83, -0.17)               | -3.51 (-4.52, -2.50)       |
| Republic of Korea*                    | 7.29 (6.60, 7.99)      | 1.02 (-1.77, 3.88)         | 0.19 (-1.69, 2.11)         | 1.62 (0.55, 2.71)             | 4.99 (4.16, 5.84)                  | -1.39 (-2.15, -0.63)       |
| Thailand*                             | -0.11 (-0.51, 0.30)    | -3.15 (-10.12, 4.35)       | -2.18 (-6.56, 2.40)        | 2.20 (-0.10, 4.55)            | 2.15 (0.58, 3.74)                  | -3.70 (-5.31, -2.07)       |
| Turkey*                               | 3.61 (3.01, 4.21)      | 5.28 (2.72, 7.89)          | 1.56 (-1.96, 5.21)         | 1.33 (-0.59, 3.28)            | 2.16 (1.10, 3.23)                  | 6.27 (3.65, 8.95)          |
| <b>Europe</b>                         |                        |                            |                            |                               |                                    |                            |
| Austria                               | 0.95 (0.67, 1.22)      | -3.13 (-5.69, -0.51)       | 1.66 (-0.72, 4.11)         | -0.30 (-1.72, 1.13)           | 0.96 (0.32, 1.61)                  | -3.27 (-4.47, -2.07)       |
| Belarus                               | 1.35 (0.90, 1.80)      | 3.67 (0.83, 6.58)          | 0.79 (-0.85, 2.46)         | 1.57 (0.57, 2.58)             | 0.95 (0.21, 1.71)                  | 3.48 (2.19, 4.79)          |
| Bulgaria                              | 0.54 (0.06, 1.02)      | 5.02 (2.94, 7.14)          | -0.34 (-4.24, 3.72)        | -0.73 (-2.32, 0.88)           | 1.34 (0.30, 2.40)                  | -1.50 (-2.78, -0.21)       |
| Croatia                               | 0.61 (-1.04, 2.28)     | 5.39 (1.95, 8.96)          | -4.36 (-8.70, 0.19)        | -1.80 (-4.02, 0.48)           | 1.56 (-0.71, 3.88)                 | -1.54 (-3.32, 0.28)        |
| Cyprus                                | 2.44 (1.41, 3.48)      | 0.98 (-4.55, 6.83)         | -3.25 (-11.05, 5.22)       | -3.03 (-8.20, 2.42)           | 0.39 (-2.17, 3.01)                 | 1.45 (-6.20, 9.72)         |
| Czech Republic                        | 0.94 (0.64, 1.24)      | 0.04 (-2.13, 2.26)         | 0.08 (-1.53, 3.55)         | -1.43 (-2.88, 0.05)           | 3.98 (3.18, 4.79)                  | -1.68 (-2.52, -0.83)       |
| Denmark                               | 2.02 (1.39, 2.66)      | -6.33 (-15.49, 3.82)       | -2.98 (-5.98, 1.98)        | -1.25 (-3.03, 0.55)           | 2.22 (1.19, 3.27)                  | 0.78 (-0.62, 2.20)         |
| Estonia                               | 0.81 (-0.40, 2.05)     | 0.39 (-6.30, 7.55)         | -2.26 (-8.00, 3.84)        | -2.26 (-6.04, 1.67)           | 0.80 (-2.43, 4.12)                 | 0.94 (-2.07, 4.04)         |
| France*                               | 1.28 (1.01, 1.54)      | -2.15 (-7.30, 3.29)        | 0.26 (-2.53, 3.13)         | 0.33 (-0.77, 1.44)            | 1.54 (1.12, 1.96)                  | -3.83 (-5.80, -1.82)       |
| Germany*                              | 0.80 (0.16, 1.44)      | 1.68 (-3.73, 7.39)         | 0.67 (-3.36, 4.87)         | -0.22 (-3.05, 2.68)           | 1.77 (0.90, 2.66)                  | -1.01 (-2.97, 1.00)        |
| Iceland                               | -1.86 (-3.42, -0.28)   | -3.12 (-11.00, 5.46)       | -3.44 (-10.95, 4.71)       | -4.25 (-9.63, 1.45)           | 0.69 (-4.36, 6.01)                 | 0.14 (-3.84, 4.28)         |
| Ireland                               | 1.63 (1.16, 2.09)      | 1.27 (-1.70, 4.32)         | -0.76 (-3.74, 2.32)        | -0.77 (-2.61, 1.10)           | 0.70 (-0.07, 1.48)                 | 4.68 (2.92, 6.48)          |
| Italy*                                | 1.91 (1.55, 2.27)      | 1.27 (-1.24, 3.84)         | 0.41 (-3.64, 4.63)         | 1.42 (-1.08, 3.98)            | -0.01 (-1.21, 1.20)                | -0.44 (-3.00, 2.19)        |
| Lithuania                             | 1.55 (0.97, 2.14)      | -2.40 (-6.55, 1.94)        | -1.31 (-5.24, 2.79)        | 0.83 (-0.64, 2.32)            | 2.04 (0.81, 3.28)                  | 1.17 (-0.20, 2.56)         |
| Malta                                 | 1.80 (-0.23, 3.87)     | -8.01 (-14.52, -1.00)      | -2.90 (-7.79, 2.25)        | 1.34 (-6.66, 10.03)           | 1.72 (-0.86, 4.36)                 | 1.89 (-3.72, 7.82)         |
| Netherlands                           | 1.80 (1.56, 2.05)      | 1.34 (-0.57, 3.28)         | 1.78 (0.38, 3.19)          | 0.49 (-0.40, 1.38)            | 1.62 (1.13, 2.11)                  | 1.16 (-0.03, 2.37)         |
| Norway                                | 1.28 (0.77, 1.78)      | -0.01 (-3.68, 3.79)        | 2.21 (-0.64, 5.15)         | -0.28 (-2.01, 1.48)           | 2.21 (0.65, 3.79)                  | 1.74 (0.37, 3.14)          |
| Poland*                               | 0.13 (-1.04, 1.31)     | -1.46 (-7.55, 5.03)        | 0.64 (-6.77, 8.64)         | -2.26 (-5.29, 0.86)           | -0.73 (-2.53, 1.11)                | -7.35 (-11.39, -3.13)      |
| Slovenia                              | 0.55 (-0.12, 1.22)     | 4.15 (-3.69, 12.63)        | -3.84 (-8.37, 0.91)        | 1.33 (-2.55, 5.36)            | 2.53 (1.00, 4.09)                  | -7.26 (-9.30, -5.17)       |
| Spain*                                | -0.39 (-0.82, 0.04)    | -1.88 (-5.27, 1.62)        | 0.26 (-1.89, 2.46)         | -2.60 (-4.03, -1.14)          | 0.64 (-0.38, 1.67)                 | -4.79 (-7.34, -2.16)       |
| Switzerland*                          | 0.98 (0.39, 1.57)      | 6.56 (1.19, 12.22)         | 0.02 (-3.66, 3.85)         | 0.71 (-1.32, 2.78)            | 1.69 (0.51, 2.88)                  | -1.52 (-3.43, 0.42)        |
| United Kingdom*                       | 1.55 (1.29, 1.82)      | -5.12 (-6.75, -3.45)       | 0.68 (-0.38, 1.75)         | -0.06 (-0.64, 0.53)           | 0.09 (-0.19, 0.37)                 | 3.03 (2.06, 4.02)          |
| <b>Oceania</b>                        |                        |                            |                            |                               |                                    |                            |
| Australia                             | 0.10 (-0.14, 0.33)     | -5.36 (-7.66, -3.01)       | -0.18 (-1.21, 0.86)        | 0.65 (-0.45, 1.76)            | 0.36 (0.01, 0.72)                  | 0.90 (-0.32, 2.13)         |
| New Zealand                           | -0.35 (-0.86, 0.16)    | -10.90 (-15.79, -5.73)     | -0.08 (-4.02, 4.03)        | 0.67 (-0.42, 1.78)            | -0.45 (-1.35, 0.46)                | -2.53 (-4.55, -0.46)       |
| Country                               | Colon                  | Connective and soft tissue | Corpus uteri (female only) | Eye                           | Gallbladder and extrahepatic ducts | Hodgkin lymphoma           |

|                      |                                              |                     |                       |                      |                        |                       |                      |
|----------------------|----------------------------------------------|---------------------|-----------------------|----------------------|------------------------|-----------------------|----------------------|
| <b>Africa</b>        |                                              |                     |                       |                      |                        |                       |                      |
|                      | Uganda*                                      | -0.25 (-5.29, 5.06) | -0.65 (-5.09, 3.99)   | 7.68 (0.04, 15.92)   | -0.14 (-3.15, 2.97)    | —                     | 3.43 (-4.18, 11.65)  |
| <b>South America</b> |                                              |                     |                       |                      |                        |                       |                      |
|                      | Brazil*                                      | -0.21 (-5.39, 5.24) | -5.48 (-9.19, -1.63)  | 1.06 (-5.77, 8.38)   | -4.96 (-13.38, 4.27)   | 1.64 (-2.84, 6.33)    | 1.90 (-1.86, 5.80)   |
|                      | Chile*                                       | 0.11 (-7.34, 8.15)  | -1.37 (-6.40, 3.92)   | 4.34 (-12.05, 23.78) | —                      | -1.71 (-6.22, 3.01)   | 0.30 (-7.47, 8.72)   |
|                      | Colombia*                                    | 1.61 (-2.75, 6.16)  | 0.86 (-4.12, 6.09)    | 2.52 (-3.57, 9.00)   | 5.99 (-0.05, 12.39)    | -3.50 (-9.35, 2.73)   | 2.46 (-1.56, 6.64)   |
|                      | Ecuador*                                     | 0.78 (-1.68, 3.31)  | 0.41 (-3.07, 4.01)    | 5.51 (-2.38, 14.04)  | -1.41 (-6.98, 4.51)    | 1.43 (-4.97, 8.26)    | 0.24 (-5.13, 5.91)   |
| <b>North America</b> |                                              |                     |                       |                      |                        |                       |                      |
|                      | Canada*                                      | 4.15 (2.96, 5.35)   | 0.62 (-0.76, 2.02)    | 2.69 (1.43, 3.96)    | 2.16 (-0.45, 4.83)     | 8.14 (4.05, 12.38)    | -0.31 (-0.88, 0.26)  |
|                      | United States of America*                    | 1.96 (1.63, 2.29)   | 0.20 (-0.31, 0.72)    | 3.12 (2.86, 3.39)    | -0.69 (-1.60, 0.24)    | 3.42 (1.74, 5.13)     | -0.29 (-0.54, -0.03) |
|                      | <i>USA-American, Indian, Alaskan Native*</i> | 3.17 (-0.69, 7.17)  | 1.03 (-2.44, 4.62)    | 3.21 (-0.06, 6.59)   | -2.27 (-6.21, 1.82)    | -3.96 (-18.18, 12.75) | -0.08 (-3.88, 3.88)  |
|                      | <i>USA-Asian-Pacific Islander*</i>           | -0.12 (-1.68, 1.46) | 0.47 (-1.30, 2.27)    | 2.89 (1.78, 4.02)    | -2.20 (-9.45, 5.63)    | 0.89 (-3.71, 5.71)    | 3.54 (1.85, 5.26)    |
|                      | <i>USA-Black*</i>                            | 0.82 (-0.00, 1.64)  | 0.27 (-0.47, 1.02)    | 3.70 (2.32, 5.11)    | -0.13 (-3.30, 3.15)    | 3.96 (1.07, 6.93)     | 1.28 (0.77, 1.79)    |
|                      | <i>USA-White*</i>                            | 2.37 (2.02, 2.72)   | 0.25 (-0.33, 0.84)    | 3.18 (2.86, 3.50)    | -0.47 (-1.42, 0.50)    | 3.49 (1.88, 5.12)     | -0.46 (-0.73, -0.19) |
| <b>Asia</b>          |                                              |                     |                       |                      |                        |                       |                      |
|                      | Bahrain*                                     | 2.15 (-4.17, 8.88)  | -1.71 (-9.31, 6.52)   | -2.68 (-10.96, 6.36) | —                      | —                     | -1.36 (-8.27, 6.06)  |
|                      | China*                                       | -1.00 (-2.79, 0.82) | -1.42 (-3.16, 0.36)   | 4.80 (2.72, 6.92)    | -1.90 (-8.93, 5.66)    | -3.31 (-8.46, 2.12)   | 2.29 (-0.11, 4.74)   |
|                      | India*                                       | 4.07 (1.63, 6.56)   | 1.92 (-3.19, 7.29)    | 2.75 (-5.52, 11.73)  | -1.99 (-7.58, 3.93)    | 6.05 (0.07, 12.38)    | -0.21 (-3.34, 3.02)  |
|                      | Israel                                       | 3.61 (1.29, 5.99)   | -2.82 (-5.49, -0.06)  | 2.93 (-1.33, 7.38)   | 0.09 (-5.35, 5.85)     | 5.18 (1.00, 9.53)     | -0.84 (-1.71, 0.03)  |
|                      | Japan*                                       | 1.49 (0.34, 2.65)   | 4.56 (3.28, 5.86)     | 9.90 (6.58, 13.32)   | 3.06 (-3.35, 9.89)     | -7.31 (-12.64, -1.65) | 8.45 (6.13, 10.82)   |
|                      | Kuwait*                                      | 0.99 (-3.77, 5.98)  | 4.84 (-3.98, 14.47)   | -3.07 (-7.77, 1.87)  | —                      | —                     | 7.58 (4.47, 10.78)   |
|                      | Philippines*                                 | 0.78 (-1.30, 2.91)  | -2.23 (-4.36, -0.05)  | -0.83 (-3.96, 2.41)  | -1.56 (-6.24, 3.35)    | -1.05 (-7.64, 6.01)   | 2.85 (0.33, 5.43)    |
|                      | Republic of Korea*                           | 3.39 (2.01, 4.79)   | 5.41 (3.94, 6.90)     | 9.09 (7.29, 10.92)   | 4.77 (-2.96, 13.10)    | -3.16 (-6.12, -0.12)  | 9.59 (6.90, 12.35)   |
|                      | Thailand*                                    | 1.23 (-1.14, 3.66)  | -2.53 (-6.11, 1.20)   | 1.46 (-3.83, 7.04)   | -1.60 (-9.30, 6.76)    | -0.41 (-6.58, 6.17)   | 5.58 (0.21, 11.24)   |
|                      | Turkey*                                      | 2.78 (-0.38, 6.03)  | 0.68 (-2.50, 3.95)    | 4.37 (1.54, 7.28)    | 0.08 (-11.74, 13.47)   | 2.95 (-3.40, 9.72)    | 3.25 (1.28, 5.26)    |
| <b>Europe</b>        |                                              |                     |                       |                      |                        |                       |                      |
|                      | Austria                                      | 4.85 (2.34, 7.41)   | 0.86 (-1.01, 2.77)    | 4.81 (1.22, 8.52)    | 1.34 (-4.67, 7.72)     | 5.38 (-1.82, 13.10)   | 0.39 (-0.88, 1.67)   |
|                      | Belarus                                      | 0.26 (-1.80, 2.37)  | -0.56 (-3.08, 2.03)   | 2.88 (0.47, 5.35)    | -4.75 (-10.06, 0.87)   | -0.05 (-6.67, 7.04)   | 0.40 (-0.72, 1.53)   |
|                      | Bulgaria                                     | 0.20 (-1.62, 2.06)  | 0.67 (-1.13, 2.50)    | 1.83 (-0.34, 4.05)   | 0.48 (-7.28, 8.90)     | -1.91 (-7.65, 4.18)   | -0.15 (-1.70, 1.43)  |
|                      | Croatia                                      | 2.25 (-1.76, 6.42)  | 7.44 (0.92, 14.37)    | 3.29 (-1.77, 8.62)   | -3.05 (-8.96, 3.25)    | -6.78 (-12.48, -0.70) | 0.13 (-2.42, 2.75)   |
|                      | Cyprus                                       | -0.68 (-5.85, 4.78) | 6.36 (-0.44, 13.63)   | 1.01 (-6.56, 9.18)   | -17.62 (-29.94, -3.14) | —                     | 0.52 (-2.03, 3.14)   |
|                      | Czech Republic                               | 1.36 (0.15, 2.59)   | -0.56 (-2.49, 1.40)   | -0.97 (-3.16, 1.28)  | -5.94 (-11.00, -0.58)  | -5.04 (-10.58, 0.84)  | 0.86 (-0.45, 2.20)   |
|                      | Denmark                                      | 3.33 (0.86, 5.86)   | 6.66 (3.78, 9.62)     | -3.68 (-9.81, 2.87)  | 0.88 (-6.39, 8.71)     | 4.37 (-2.77, 12.02)   | 0.71 (-1.63, 3.09)   |
|                      | Estonia                                      | 4.43 (-3.37, 12.85) | -0.59 (-6.46, 5.65)   | 1.28 (-4.47, 7.38)   | -3.49 (-8.62, 1.92)    | —                     | 0.16 (-2.08, 2.45)   |
|                      | France*                                      | 3.57 (1.62, 5.56)   | 1.03 (-2.08, 4.24)    | -2.67 (-8.40, 3.41)  | 0.90 (-4.21, 6.29)     | -2.56 (-8.26, 3.49)   | 2.77 (0.90, 4.67)    |
|                      | Germany*                                     | 3.43 (-0.48, 7.49)  | 1.12 (-4.04, 6.57)    | 5.90 (-0.97, 13.25)  | -3.65 (-15.25, 9.55)   | 5.68 (-0.35, 12.08)   | 0.58 (-2.75, 4.03)   |
|                      | Iceland                                      | 0.18 (-5.51, 6.21)  | -0.69 (-11.87, 11.91) | -0.20 (-0.73, 0.33)  | —                      | —                     | -0.72 (-8.03, 7.18)  |
|                      | Ireland                                      | 6.20 (2.92, 9.58)   | -1.35 (-5.49, 2.97)   | -2.11 (-6.79, 2.81)  | -1.96 (-8.54, 5.09)    | 1.63 (-3.79, 7.34)    | 2.63 (0.95, 4.33)    |
|                      | Italy*                                       | 2.05 (-1.27, 5.49)  | 4.30 (0.23, 8.54)     | 2.82 (-2.09, 7.97)   | -3.12 (-10.10, 4.40)   | 1.35 (-2.48, 5.32)    | 2.00 (0.03, 4.00)    |
|                      | Lithuania                                    | 0.34 (-3.22, 4.03)  | 0.07 (-3.94, 4.25)    | -0.19 (-4.17, 3.96)  | 4.49 (-3.03, 12.59)    | 4.42 (0.75, 8.22)     | -1.83 (-4.04, 0.44)  |
|                      | Malta                                        | 7.17 (-0.72, 15.68) | -2.77 (-9.78, 4.79)   | -4.37 (-16.44, 9.44) | —                      | —                     | 1.78 (-1.73, 5.40)   |
|                      | Netherlands                                  | 3.39 (2.28, 4.51)   | -1.40 (-3.09, 0.31)   | -0.51 (-4.06, 3.18)  | -1.69 (-5.41, 2.17)    | 1.61 (-1.64, 4.96)    | 0.39 (-0.45, 1.24)   |
|                      | Norway                                       | 5.51 (3.25, 7.82)   | 1.15 (-1.93, 4.34)    | 6.96 (-1.20, 15.79)  | 0.16 (-8.46, 9.59)     | 5.49 (-1.22, 12.66)   | 1.33 (-0.31, 3.00)   |
|                      | Poland*                                      | 0.95 (-4.23, 6.42)  | -3.82 (-8.83, 1.48)   | 0.94 (-4.43, 6.62)   | -1.12 (-12.03, 11.13)  | 5.24 (2.35, 8.20)     | -1.21 (-3.74, 1.39)  |
|                      | Slovenia                                     | 0.59 (-4.08, 5.49)  | -7.12 (-12.39, -1.52) | 1.97 (-7.02, 11.83)  | 4.67 (-3.75, 13.82)    | 0.00 (-0.30, 0.30)    | -0.34 (-2.44, 1.81)  |
|                      | Spain*                                       | 0.07 (-1.89, 2.08)  | -2.79 (-5.83, 0.36)   | 1.66 (-2.20, 5.67)   | -4.75 (-12.79, 4.03)   | -0.87 (-6.84, 5.49)   | 0.49 (-0.22, 1.20)   |
|                      | Switzerland*                                 | 7.00 (1.87, 12.40)  | 0.29 (-3.40, 4.12)    | -0.88 (-7.31, 5.99)  | -1.37 (-8.23, 6.01)    | 0.95 (-4.36, 6.56)    | 0.76 (-1.43, 3.01)   |
|                      | United Kingdom*                              | 5.90 (4.34, 7.49)   | 0.58 (-0.49, 1.67)    | 5.42 (4.07, 6.79)    | 0.55 (-1.27, 2.40)     | 2.56 (0.06, 5.12)     | 0.99 (0.40, 1.58)    |
| <b>Oceania</b>       |                                              |                     |                       |                      |                        |                       |                      |
|                      | Australia                                    | 3.84 (2.44, 5.27)   | 0.06 (-0.94, 1.08)    | 4.28 (2.67, 5.92)    | -4.76 (-7.65, -1.77)   | -3.07 (-6.71, 0.72)   | 1.62 (0.76, 2.48)    |
|                      | New Zealand                                  | 3.61 (1.52, 5.75)   | -0.87 (-3.23, 1.55)   | 11.05 (9.05, 13.09)  | -6.55 (-12.81, 0.16)   | 3.79 (-3.31, 11.41)   | 0.93 (-1.32, 3.24)   |

| Country                               | Kaposi sarcoma         | Kidney and renal pelvis | Larynx                 | Leukaemia             | Lip, oral cavity and pharynx | Liver and intrahepatic bile ducts |
|---------------------------------------|------------------------|-------------------------|------------------------|-----------------------|------------------------------|-----------------------------------|
| <b>Africa</b>                         |                        |                         |                        |                       |                              |                                   |
| Uganda*                               | -2.98 (-4.46, -1.48)   | 4.08 (-2.28, 10.87)     | -7.79 (-16.11, 1.36)   | 11.52 (5.21, 18.20)   | 0.46 (-3.16, 4.21)           | 6.54 (2.94, 10.27)                |
| <b>South America</b>                  |                        |                         |                        |                       |                              |                                   |
| Brazil*                               | 1.39 (-7.39, 10.99)    | 3.30 (-4.27, 11.46)     | -1.49 (-8.21, 5.73)    | -6.89 (-11.82, -1.68) | 1.17 (-3.35, 5.90)           | 1.01 (-6.75, 9.42)                |
| Chile*                                | —                      | 4.10 (-2.09, 10.67)     | —                      | 0.00 (-5.32, 5.62)    | 0.61 (-7.68, 9.66)           | -1.20 (-7.46, 5.49)               |
| Colombia*                             | -5.96 (-9.48, -2.31)   | 8.07 (-2.67, 17.59)     | -4.56 (-11.94, 3.44)   | 0.10 (-2.33, 2.58)    | 1.27 (-2.17, 4.82)           | -7.16 (-12.53, -1.45)             |
| Ecuador*                              | 8.05 (1.16, 15.40)     | -1.98 (-9.34, 5.99)     | —                      | 0.94 (-1.25, 3.18)    | 7.07 (2.08, 12.30)           | 2.88 (-4.70, 11.07)               |
| <b>North America</b>                  |                        |                         |                        |                       |                              |                                   |
| Canada*                               | -5.68 (-8.31, -2.97)   | 2.67 (2.12, 3.22)       | -2.10 (-6.00, 1.97)    | 0.63 (-0.08, 1.36)    | -0.10 (-1.10, 0.92)          | 0.14 (-2.68, 3.04)                |
| United States of America*             | -4.00 (-4.55, -3.46)   | 6.12 (5.47, 6.77)       | -3.59 (-4.88, -2.29)   | 1.30 (1.10, 1.50)     | 0.48 (0.08, 0.88)            | 0.80 (0.02, 1.59)                 |
| USA-American, Indian, Alaskan Native* | -5.63 (-14.78, 4.50)   | 6.44 (2.16, 10.89)      | -5.46 (-17.95, 8.93)   | -0.92 (-2.63, 0.82)   | -3.26 (-6.58, 0.18)          | -6.50 (-12.17, -0.47)             |
| USA-Asian-Pacific Islander*           | -2.86 (-7.49, 2.00)    | 4.82 (2.81, 6.87)       | 4.25 (-1.90, 10.79)    | 0.84 (-0.20, 1.90)    | -0.15 (-1.10, 0.80)          | -3.24 (-4.62, -1.84)              |
| USA-Black*                            | -2.20 (-3.06, -1.34)   | 3.85 (3.03, 4.69)       | -4.65 (-8.03, -1.15)   | 1.08 (0.59, 1.57)     | 0.14 (-0.83, 1.11)           | 0.86 (-0.79, 2.54)                |
| USA-White*                            | -5.64 (-6.53, -4.74)   | 6.78 (6.06, 7.50)       | -3.39 (-4.77, -2.00)   | 1.42 (1.18, 1.66)     | 0.55 (0.06, 1.04)            | 1.21 (0.36, 2.08)                 |
| <b>Asia</b>                           |                        |                         |                        |                       |                              |                                   |
| Bahrain*                              | —                      | -2.58 (-11.37, 7.09)    | —                      | -2.81 (-9.63, 4.52)   | 3.30 (-3.29, 10.34)          | 4.86 (-6.26, 17.30)               |
| China*                                | —                      | 7.89 (6.32, 9.49)       | -8.74 (-13.81, -3.37)  | -0.84 (-1.74, 0.07)   | -2.45 (-2.95, -1.95)         | -3.05 (-3.80, -2.29)              |
| India*                                | —                      | -0.59 (-7.92, 7.34)     | -3.48 (-9.73, 3.21)    | 1.62 (-0.17, 3.45)    | 5.08 (2.60, 7.62)            | 2.67 (-1.21, 6.69)                |
| Israel                                | -4.41 (-11.34, 3.05)   | 3.85 (1.54, 6.21)       | 1.52 (-3.36, 6.65)     | -1.95 (-2.87, -1.01)  | -0.52 (-3.32, 2.36)          | -2.16 (-7.72, 3.74)               |
| Japan*                                | 3.98 (-38.75, 76.54)   | 4.45 (1.13, 7.87)       | -3.60 (-10.88, 4.28)   | 1.46 (-0.05, 2.99)    | 4.92 (3.23, 6.63)            | -1.97 (-3.68, -0.23)              |
| Kuwait*                               | —                      | -0.61 (-7.23, 6.47)     | —                      | 2.43 (-3.12, 8.29)    | -5.33 (-10.74, 0.41)         | -6.73 (-14.97, 2.30)              |
| Philippines*                          | -2.83 (-3.66, -2.00)   | -5.26 (-8.66, -1.73)    | -2.45 (-8.70, 4.23)    | -1.4 (-3.17, 0.40)    | -2.30 (-3.92, -0.65)         | -6.38 (-7.62, -5.12)              |
| Republic of Korea*                    | 10.92 (1.75, 20.91)    | 7.11 (5.89, 8.34)       | -3.73 (-9.83, 2.79)    | 0.64 (-0.46, 1.77)    | 3.29 (2.12, 4.47)            | -3.50 (-4.44, -2.56)              |
| Thailand*                             | 9.02 (1.61, 16.97)     | 2.68 (-1.87, 7.45)      | -2.67 (-8.70, 3.74)    | 1.27 (-0.56, 3.14)    | 1.86 (-0.12, 3.88)           | -0.14 (-1.41, 1.15)               |
| Turkey*                               | 4.02 (-2.59, 11.07)    | 5.37 (2.34, 8.49)       | -8.66 (-16.27, -0.36)  | 2.34 (1.21, 3.47)     | 1.41 (-0.61, 3.48)           | -2.23 (-5.43, 1.08)               |
| <b>Europe</b>                         |                        |                         |                        |                       |                              |                                   |
| Austria                               | —                      | -0.09 (-1.58, 1.43)     | -8.87 (-15.88, -1.28)  | 0.05 (-1.83, 1.96)    | -1.22 (-3.85, 1.49)          | -0.43 (-3.73, 2.99)               |
| Belarus                               | —                      | 3.25 (1.51, 5.02)       | -2.62 (-7.78, 2.82)    | -1.73 (-2.80, -0.64)  | 0.40 (-1.91, 2.75)           | 3.26 (-1.65, 8.41)                |
| Bulgaria                              | 3.21 (-6.14, 13.48)    | 1.01 (-0.67, 2.72)      | -7.85 (-11.17, -4.39)  | 0.31 (-2.07, 2.76)    | 1.15 (-0.26, 2.58)           | -0.66 (-4.65, 3.51)               |
| Croatia                               | —                      | 1.32 (-2.50, 5.29)      | -6.51 (-11.54, -1.20)  | -5.39 (-7.98, -2.73)  | -3.01 (-6.50, 0.61)          | -6.04 (-11.30, -0.46)             |
| Cyprus                                | -7.76 (-11.02, -4.38)  | 0.88 (-4.77, 6.86)      | -1.80 (-2.16, -1.43)   | -0.80 (-4.05, 2.56)   | -0.63 (-7.77, 7.07)          | -0.87 (-9.20, 8.23)               |
| Czech Republic                        | 2.71 (-3.21, 8.98)     | 0.38 (-1.64, 2.44)      | -0.33 (-7.58, 7.49)    | 2.26 (-0.04, 4.62)    | -0.90 (-3.61, 1.89)          | -1.09 (-5.66, 3.71)               |
| Denmark                               | -6.94 (-15.45, 2.42)   | 5.81 (2.89, 8.82)       | -2.27 (-9.61, 5.68)    | -0.25 (-2.11, 1.64)   | -1.38 (-3.87, 1.17)          | -1.10 (-7.88, 6.18)               |
| Estonia                               | —                      | 3.96 (-3.41, 11.90)     | 0.45 (-11.00, 13.37)   | 0.64 (-3.99, 5.49)    | 3.20 (-2.12, 8.80)           | -2.06 (-8.42, 4.74)               |
| France*                               | -13.17 (-17.37, -8.76) | 4.10 (1.58, 6.69)       | -7.11 (-12.80, -1.05)  | -1.38 (-2.96, 0.23)   | -2.50 (-4.90, -0.04)         | 0.45 (-4.34, 5.49)                |
| Germany*                              | 0.30 (-6.45, 7.55)     | -1.06 (-3.77, 1.73)     | -1.74 (-9.23, 6.36)    | 0.17 (-2.80, 3.22)    | 0.29 (-5.01, 5.89)           | 8.02 (0.48, 16.13)                |
| Iceland                               | —                      | -2.39 (-8.45, 4.06)     | —                      | 3.58 (-2.55, 10.09)   | 2.92 (-3.44, 9.70)           | 10.30 (1.15, 20.27)               |
| Ireland                               | 5.31 (-1.85, 13.00)    | 5.54 (1.44, 9.80)       | -3.71 (-10.98, 4.15)   | -0.29 (-2.12, 1.58)   | 3.79 (0.50, 7.17)            | 5.77 (-0.54, 12.50)               |
| Italy*                                | -1.73 (-8.12, 5.11)    | 2.58 (-0.45, 5.71)      | -1.68 (-9.37, 6.66)    | -0.63 (-2.85, 1.64)   | 3.37 (0.18, 6.67)            | 1.32 (-3.86, 6.78)                |
| Lithuania                             | —                      | 3.51 (1.36, 5.70)       | 4.47 (-1.93, 11.29)    | 0.82 (-1.33, 3.02)    | 1.89 (-3.64, 7.72)           | 0.48 (-6.79, 8.31)                |
| Malta                                 | —                      | 1.21 (-5.36, 8.24)      | —                      | 2.68 (-4.54, 10.45)   | -0.02 (-5.99, 6.33)          | —                                 |
| Netherlands                           | 0.30 (-2.13, 2.80)     | 4.19 (1.70, 6.75)       | -8.67 (-13.62, -3.44)  | 0.53 (-0.56, 1.63)    | 1.72 (0.07, 3.40)            | 2.79 (0.44, 5.20)                 |
| Norway                                | 4.56 (-4.20, 14.13)    | 7.36 (3.53, 11.32)      | -3.74 (-9.46, 2.35)    | 1.67 (-1.16, 4.57)    | 1.86 (-2.16, 6.05)           | 0.26 (-5.63, 6.52)                |
| Poland*                               | —                      | -2.45 (-8.22, 3.68)     | -10.01 (-13.60, -6.26) | 6.21 (-0.79, 13.70)   | 4.18 (-2.76, 11.60)          | 5.28 (-0.40, 11.28)               |
| Slovenia                              | —                      | 2.15 (-1.91, 6.37)      | -8.82 (-13.42, -3.97)  | -1.61 (-4.50, 1.37)   | -0.29 (-5.07, 4.72)          | -5.41 (-10.30, -0.25)             |
| Spain*                                | -4.53 (-9.70, 0.93)    | -0.15 (-2.67, 2.43)     | -7.21 (-12.82, -1.23)  | 0.65 (-1.41, 2.76)    | -2.41 (-5.40, 0.67)          | -0.81 (-9.56, 8.80)               |
| Switzerland*                          | 1.92 (-4.85, 9.18)     | 4.61 (1.19, 8.15)       | -2.96 (-9.09, 3.59)    | 0.67 (-1.89, 3.31)    | 3.25 (0.20, 6.39)            | 1.23 (-7.18, 10.40)               |
| United Kingdom*                       | 2.20 (-0.35, 4.81)     | 4.46 (3.51, 5.42)       | 1.66 (-1.25, 4.65)     | 0.29 (-0.35, 0.93)    | 2.68 (1.96, 3.40)            | 2.98 (0.70, 5.31)                 |
| <b>Oceania</b>                        |                        |                         |                        |                       |                              |                                   |
| Australia                             | -6.12 (-9.42, -2.70)   | 2.31 (1.24, 3.39)       | -3.46 (-9.09, 2.51)    | 0.05 (-0.55, 0.67)    | -1.36 (-2.45, -0.26)         | 0.76 (-2.68, 4.32)                |
| New Zealand                           | 1.51 (-5.85, 9.43)     | 0.51 (-2.55, 3.66)      | 3.85 (-2.76, 10.91)    | 0.35 (-1.59, 2.33)    | 0.15 (-1.92, 2.28)           | -1.67 (-6.43, 3.33)               |

| Country                               | Lung (incl. trachea) | Melanoma of skin      | Multiple myeloma and immunoproliferative diseases | Non-Hodgkin lymphoma | Oesophagus            |
|---------------------------------------|----------------------|-----------------------|---------------------------------------------------|----------------------|-----------------------|
| <b>Africa</b>                         |                      |                       |                                                   |                      |                       |
| Uganda*                               | -2.95 (-9.15, 3.68)  | -1.41 (-9.17, 7.02)   | -11.72 (-16.86, -6.26)                            | 3.50 (-0.24, 7.38)   | -2.52 (-7.66, 2.90)   |
| <b>South America</b>                  |                      |                       |                                                   |                      |                       |
| Brazil*                               | 4.02 (-4.48, 13.28)  | -0.46 (-4.61, 3.87)   | -4.26 (-10.25, 2.14)                              | 4.01 (-2.33, 10.75)  | -8.43 (-16.77, 0.74)  |
| Chile*                                | —                    | -3.85 (-9.10, 1.70)   | —                                                 | 2.42 (-4.31, 9.63)   | -1.30 (-6.70, 4.41)   |
| Colombia*                             | 2.82 (-3.72, 9.82)   | -2.64 (-6.18, 1.04)   | 2.74 (-3.50, 9.39)                                | -0.68 (-2.99, 1.68)  | 0.44 (-5.58, 6.85)    |
| Ecuador*                              | 8.10 (-3.22, 20.74)  | -4.30 (-9.59, 1.31)   | -0.73 (-7.10, 6.08)                               | 1.83 (-1.23, 4.99)   | —                     |
| <b>North America</b>                  |                      |                       |                                                   |                      |                       |
| Canada*                               | -3.03 (-4.56, -1.48) | -0.49 (-1.13, 0.14)   | -1.36 (-4.44, 1.83)                               | -1.29 (-1.64, -0.95) | -0.16 (-4.22, 4.07)   |
| United States of America*             | -2.72 (-3.11, -2.32) | 0.13 (-0.92, 1.19)    | 1.62 (0.87, 2.39)                                 | -0.42 (-0.64, -0.20) | 0.07 (-1.00, 1.14)    |
| USA-American, Indian, Alaskan Native* | -4.02 (-10.99, 3.50) | 0.82 (-3.78, 5.64)    | -4.29 (-10.92, 2.84)                              | -1.11 (-3.23, 1.05)  | 1.36 (-3.42, 6.37)    |
| USA-Asian-Pacific Islander*           | -1.15 (-2.69, 0.41)  | -0.61 (-3.15, 1.99)   | 4.98 (-2.71, 13.27)                               | -0.14 (-1.16, 0.88)  | -3.94 (-10.40, 2.99)  |
| USA-Black*                            | -4.50 (-5.40, -3.59) | -2.43 (-4.47, -0.35)  | 1.72 (-0.23, 3.71)                                | -1.06 (-1.50, -0.60) | -4.33 (-7.07, -1.50)  |
| USA-White*                            | -2.42 (-2.94, -1.89) | 0.41 (-0.64, 1.47)    | 1.49 (0.78, 2.21)                                 | -0.32 (-0.55, -0.09) | 0.88 (-0.36, 2.13)    |
| <b>Asia</b>                           |                      |                       |                                                   |                      |                       |
| Bahrain*                              | -3.17 (-4.12, -2.21) | —                     | —                                                 | 1.69 (-2.10, 5.63)   | -4.90 (-9.46, -0.11)  |
| China*                                | -1.46 (-2.48, -0.44) | -1.00 (-5.52, 3.74)   | -1.72 (-6.35, 3.15)                               | 0.81 (-0.31, 1.95)   | -3.27 (-7.34, 0.99)   |
| India*                                | 0.90 (-2.10, 3.98)   | 2.00 (-7.16, 12.05)   | -0.37 (-8.41, 8.37)                               | -0.78 (-2.84, 1.32)  | -1.05 (-4.09, 2.09)   |
| Israel                                | -3.60 (-6.40, -0.72) | -2.33 (-3.41, -1.24)  | 0.94 (-5.93, 8.30)                                | -0.55 (-1.65, 0.56)  | -5.83 (-11.16, -0.17) |
| Japan*                                | 1.71 (0.72, 2.71)    | -1.13 (-5.63, 3.60)   | -2.36 (-10.18, 6.15)                              | 3.05 (0.55, 5.61)    | 4.53 (-4.30, 14.17)   |
| Kuwait*                               | -3.99 (-11.01, 3.57) | -4.60 (-5.75, -3.43)  | -3.24 (-19.87, 16.85)                             | -1.42 (-4.86, 2.14)  | 1.30 (-3.94, 6.81)    |
| Philippines*                          | -1.21 (-2.65, 0.24)  | -1.26 (-8.22, 6.22)   | 1.29 (-5.76, 8.87)                                | -1.65 (-3.51, 0.24)  | -2.46 (-10.45, 6.25)  |
| Republic of Korea*                    | -1.42 (-2.63, -0.19) | 1.75 (-1.97, 5.60)    | 1.78 (-1.14, 4.78)                                | 4.02 (3.13, 4.93)    | -3.80 (-11.42, 4.49)  |
| Thailand*                             | 0.87 (-1.04, 2.83)   | 3.44 (-4.43, 11.96)   | -2.46 (-9.35, 4.96)                               | 1.03 (-0.48, 2.57)   | 4.77 (-1.52, 11.46)   |
| Turkey*                               | -4.60 (-6.13, -3.05) | 5.69 (0.56, 11.09)    | -3.74 (-7.67, 0.36)                               | 1.13 (-0.39, 2.67)   | 5.62 (-1.98, 13.82)   |
| <b>Europe</b>                         |                      |                       |                                                   |                      |                       |
| Austria                               | 0.20 (-1.58, 2.01)   | 3.08 (1.59, 4.59)     | 2.03 (-4.28, 8.76)                                | 0.02 (-1.98, 2.06)   | 0.90 (-7.67, 10.26)   |
| Belarus                               | -1.23 (-2.99, 0.56)  | 3.01 (1.55, 4.49)     | 2.77 (-2.13, 7.92)                                | 2.97 (1.43, 4.54)    | 5.59 (-2.74, 14.64)   |
| Bulgaria                              | -2.69 (-4.52, -0.82) | 2.37 (-1.01, 5.88)    | 1.45 (-6.52, 10.09)                               | 3.58 (1.65, 5.54)    | 6.12 (-1.06, 13.82)   |
| Croatia                               | -5.88 (-9.29, -2.34) | 1.57 (-0.44, 3.62)    | -0.75 (-9.92, 9.36)                               | -0.78 (-3.71, 2.24)  | 4.73 (-2.36, 12.33)   |
| Cyprus                                | 7.30 (-0.20, 15.37)  | 1.94 (-6.02, 10.58)   | 7.66 (-0.81, 16.86)                               | 3.65 (-1.31, 8.85)   | —                     |
| Czech Republic                        | -3.41 (-5.70, -1.06) | 2.40 (1.63, 3.17)     | 2.67 (-2.46, 8.08)                                | 3.17 (2.16, 4.19)    | 2.57 (-3.74, 9.29)    |
| Denmark                               | -1.42 (-4.81, 2.09)  | 7.49 (6.10, 8.89)     | 0.99 (-6.06, 8.58)                                | 0.65 (-0.87, 2.19)   | -1.17 (-7.58, 5.68)   |
| Estonia                               | -3.56 (-9.84, 3.17)  | 7.06 (2.51, 11.82)    | 0.93 (-3.11, 5.13)                                | 5.12 (0.36, 10.11)   | 0.44 (-0.03, 0.92)    |
| France*                               | 0.08 (-2.02, 2.23)   | 3.43 (2.07, 4.81)     | -0.52 (-5.32, 4.52)                               | -1.22 (-2.34, -0.09) | -0.24 (-7.86, 8.01)   |
| Germany*                              | -0.44 (-5.37, 4.74)  | -2.97 (-4.95, -0.95)  | 7.52 (-0.50, 16.18)                               | -1.25 (-3.27, 0.81)  | -1.46 (-7.63, 5.12)   |
| Iceland                               | -1.81 (-6.91, 3.57)  | -6.72 (-11.18, -2.04) | -0.59 (-0.90, -0.27)                              | -3.55 (-9.32, 2.60)  | —                     |
| Ireland                               | 2.09 (-1.54, 5.85)   | 1.31 (0.42, 2.21)     | -1.17 (-8.17, 6.36)                               | -0.21 (-2.07, 1.68)  | -1.66 (-7.58, 4.64)   |
| Italy*                                | -0.64 (-3.57, 2.37)  | 3.14 (1.42, 4.90)     | -7.76 (-13.82, -1.27)                             | -0.96 (-2.76, 0.87)  | -3.76 (-12.17, 5.45)  |
| Lithuania                             | -2.08 (-5.93, 1.92)  | 1.48 (-0.67, 3.68)    | 0.79 (-6.63, 8.81)                                | 3.26 (1.46, 5.10)    | 8.19 (1.51, 15.31)    |
| Malta                                 | -2.95 (-10.92, 5.73) | 13.09 (4.36, 22.55)   | —                                                 | 6.59 (0.24, 13.34)   | —                     |
| Netherlands                           | -0.18 (-1.24, 0.91)  | 2.39 (1.64, 3.15)     | -2.63 (-5.88, 0.73)                               | 2.04 (1.37, 2.73)    | 0.76 (-1.84, 3.43)    |
| Norway                                | 0.58 (-1.23, 2.42)   | 0.15 (-0.88, 1.19)    | 4.44 (-0.91, 10.07)                               | 1.10 (-0.80, 3.02)   | 3.06 (-3.70, 10.29)   |
| Poland*                               | -5.15 (-11.28, 1.40) | 0.88 (-2.07, 3.93)    | -0.86 (-4.25, 2.65)                               | 4.27 (0.03, 8.70)    | 0.40 (-1.69, 2.54)    |
| Slovenia                              | -2.43 (-7.03, 2.41)  | 5.79 (3.84, 7.77)     | 3.11 (-2.41, 8.93)                                | -0.63 (-3.03, 1.84)  | -5.27 (-12.17, 2.18)  |
| Spain*                                | -5.93 (-8.62, -3.16) | 0.21 (-1.45, 1.90)    | -0.65 (-6.77, 5.86)                               | -2.82 (-4.57, -1.04) | -6.00 (-13.96, 2.69)  |
| Switzerland*                          | -0.84 (-4.98, 3.49)  | -0.92 (-2.64, 0.84)   | 2.59 (-4.53, 10.24)                               | -0.09 (-2.62, 2.50)  | 5.91 (-0.62, 12.88)   |
| United Kingdom*                       | 1.30 (0.30, 2.31)    | 2.51 (1.58, 3.44)     | 3.93 (1.49, 6.43)                                 | 0.81 (0.32, 1.30)    | -0.23 (-2.17, 1.75)   |
| <b>Oceania</b>                        |                      |                       |                                                   |                      |                       |
| Australia                             | 0.68 (-0.56, 1.93)   | -2.82 (-3.36, -2.28)  | 1.11 (-3.14, 5.55)                                | 0.34 (-0.60, 1.29)   | -0.62 (-5.10, 4.07)   |
| New Zealand                           | 0.11 (-2.68, 2.98)   | -2.50 (-3.63, -1.35)  | 1.92 (-4.74, 9.05)                                | -0.02 (-1.96, 1.95)  | 2.37 (-5.35, 10.73)   |

| Country                               | Ovary<br>(female only) | Pancreas              | Prostate<br>(male only) | Rectum and anus      | Stomach              | Testis<br>(male only) | Thyroid              |
|---------------------------------------|------------------------|-----------------------|-------------------------|----------------------|----------------------|-----------------------|----------------------|
| <b>Africa</b>                         |                        |                       |                         |                      |                      |                       |                      |
| Uganda*                               | 2.56 (-4.78, 10.46)    | 2.11 (-7.84, 13.14)   | 0.54 (-13.01, 16.19)    | 2.07 (-3.97, 8.50)   | -0.64 (-9.16, 8.66)  | -0.13 (-5.88, 5.96)   | -1.21 (-7.89, 5.97)  |
| <b>South America</b>                  |                        |                       |                         |                      |                      |                       |                      |
| Brazil*                               | 0.60 (-4.47, 5.93)     | 4.07 (-4.26, 13.12)   | 0.56 (-7.12, 8.88)      | -1.43 (-6.43, 3.83)  | -1.71 (-6.23, 3.03)  | -0.59 (-5.86, 4.96)   | 4.37 (2.30, 6.48)    |
| Chile*                                | -4.21 (-10.90, 2.98)   | —                     | —                       | -1.89 (-6.63, 3.09)  | 0.30 (-5.78, 6.78)   | 3.13 (-1.37, 7.82)    | 11.29 (4.30, 18.75)  |
| Colombia*                             | -2.64 (-6.66, 1.55)    | -2.56 (-8.71, 4.02)   | -2.90 (-12.17, 7.34)    | 1.98 (-1.81, 5.92)   | -0.57 (-2.99, 1.91)  | 2.67 (0.23, 5.16)     | 4.85 (3.03, 6.71)    |
| Ecuador*                              | 0.33 (-5.13, 6.10)     | -2.07 (-10.52, 7.18)  | -1.57 (-5.32, 2.34)     | -1.05 (-6.45, 4.66)  | 2.45 (0.07, 4.89)    | 3.24 (1.30, 5.22)     | 9.34 (6.88, 11.85)   |
| <b>North America</b>                  |                        |                       |                         |                      |                      |                       |                      |
| Canada*                               | 0.96 (-0.31, 2.25)     | 3.53 (1.69, 5.41)     | 2.05 (-5.22, 9.87)      | 4.35 (2.75, 5.97)    | 1.51 (-0.18, 3.23)   | 2.00 (1.37, 2.62)     | 5.39 (4.41, 6.38)    |
| United States of America*             | -0.15 (-0.56, 0.27)    | 2.41 (1.85, 2.97)     | 2.67 (0.40, 4.99)       | 1.90 (1.53, 2.26)    | 1.37 (0.92, 1.83)    | 0.62 (0.37, 0.88)     | 5.27 (4.96, 5.58)    |
| USA-American, Indian, Alaskan Native* | -0.25 (-4.96, 4.69)    | 1.11 (-5.15, 7.79)    | —                       | 1.74 (-1.63, 5.23)   | -2.17 (-5.70, 1.50)  | 3.85 (0.31, 7.52)     | 3.29 (1.54, 5.08)    |
| USA-Asian-Pacific Islander*           | -0.24 (-1.71, 1.25)    | 1.00 (-2.68, 4.81)    | 1.48 (-8.04, 12.00)     | -0.25 (-1.74, 1.27)  | -0.85 (-2.25, 0.56)  | 2.14 (0.69, 3.62)     | 5.62 (5.11, 6.14)    |
| USA-Black*                            | 0.42 (-0.96, 1.83)     | 1.72 (0.30, 3.15)     | 5.72 (3.48, 8.01)       | 1.95 (1.20, 2.71)    | -0.62 (-1.50, 0.26)  | 0.78 (-0.22, 1.79)    | 5.21 (4.55, 5.87)    |
| USA-White*                            | -0.12 (-0.51, 0.28)    | 2.67 (2.20, 3.13)     | 1.59 (-0.73, 3.96)      | 1.98 (1.59, 2.38)    | 1.96 (1.34, 2.58)    | 0.81 (0.53, 1.09)     | 5.37 (5.04, 5.71)    |
| <b>Asia</b>                           |                        |                       |                         |                      |                      |                       |                      |
| Bahrain*                              | 1.22 (-4.79, 7.62)     | -3.88 (-19.19, 14.34) | —                       | 2.02 (-4.10, 8.53)   | 2.86 (-4.54, 10.82)  | -2.50 (-11.94, 7.95)  | -5.14 (-11.40, 1.56) |
| China*                                | 3.89 (-0.17, 8.12)     | -2.89 (-5.84, 0.16)   | 2.94 (-2.48, 8.67)      | 0.74 (-1.29, 2.82)   | -2.38 (-3.64, -1.10) | 4.19 (2.77, 5.63)     | 11.02 (9.00, 13.08)  |
| India*                                | 2.57 (-0.08, 5.30)     | 0.88 (-4.95, 7.07)    | 2.40 (-4.60, 9.91)      | -1.51 (-4.07, 1.12)  | -0.47 (-2.56, 1.67)  | 1.71 (-2.81, 6.45)    | 4.18 (0.92, 7.54)    |
| Israel                                | -1.73 (-3.40, -0.03)   | -0.77 (-4.84, 3.48)   | -2.13 (-9.38, 5.72)     | 0.01 (-1.96, 2.02)   | -2.41 (-5.84, 1.15)  | 1.16 (-0.39, 2.74)    | 3.49 (2.46, 4.52)    |
| Japan*                                | 4.22 (2.36, 6.11)      | 4.10 (0.89, 7.40)     | 1.80 (-4.84, 8.90)      | 3.01 (0.97, 5.09)    | -4.42 (-5.59, -3.24) | 6.19 (4.13, 8.29)     | 7.60 (5.64, 9.60)    |
| Kuwait*                               | -4.66 (-10.23, 1.26)   | -0.37 (-6.01, 5.61)   | —                       | 0.34 (-6.27, 7.42)   | -6.49 (-14.06, 1.75) | 10.47 (2.81, 18.70)   | 4.73 (2.44, 7.07)    |
| Philippines*                          | 0.10 (-1.75, 1.98)     | -4.70 (-11.22, 2.31)  | -6.89 (-12.41, -1.01)   | -0.98 (-3.85, 1.97)  | -4.93 (-8.15, -1.59) | -2.35 (-5.45, 0.85)   | -1.51 (-3.05, 0.05)  |
| Republic of Korea*                    | 1.88 (0.70, 3.08)      | 0.44 (-2.20, 3.15)    | 2.92 (-3.36, 9.62)      | 6.96 (5.83, 8.11)    | -2.40 (-3.07, -1.73) | 6.90 (5.73, 8.08)     | 22.09 (20.50, 23.70) |
| Thailand*                             | -1.02 (-3.04, 1.04)    | 7.33 (1.15, 13.87)    | —                       | 2.83 (-0.61, 6.39)   | -0.32 (-3.41, 2.87)  | 1.76 (-1.64, 5.28)    | 1.12 (-0.38, 2.65)   |
| Turkey*                               | 2.80 (0.76, 4.89)      | 3.58 (-3.00, 10.60)   | -1.66 (-6.05, 2.94)     | 0.32 (-2.78, 3.53)   | 1.51 (-1.31, 4.42)   | 5.43 (3.74, 7.16)     | 14.62 (12.07, 17.22) |
| <b>Europe</b>                         |                        |                       |                         |                      |                      |                       |                      |
| Austria                               | -5.68 (-7.51, -3.81)   | 3.51 (-0.89, 8.10)    | -1.48 (-10.23, 8.12)    | -0.10 (-2.53, 2.38)  | -3.82 (-5.91, -1.69) | -0.57 (-1.32, 0.19)   | 7.59 (6.22, 8.99)    |
| Belarus                               | 4.29 (2.44, 6.17)      | -1.53 (-4.59, 1.63)   | 4.05 (0.54, 7.68)       | 0.83 (-1.76, 3.49)   | -0.77 (-2.10, 0.58)  | 2.44 (1.10, 3.80)     | 1.73 (0.57, 2.91)    |
| Bulgaria                              | -0.48 (-2.36, 1.43)    | -0.94 (-3.70, 1.90)   | 0.14 (-4.86, 5.40)      | -0.46 (-2.44, 1.57)  | -1.92 (-4.42, 0.66)  | 2.71 (1.07, 4.39)     | 5.34 (3.65, 7.06)    |
| Croatia                               | -1.39 (-4.57, 1.89)    | -4.01 (-9.86, 2.21)   | -2.93 (-16.78, 13.21)   | 0.59 (-2.31, 3.59)   | -4.84 (-7.53, -2.08) | 4.33 (2.20, 6.49)     | 6.37 (4.88, 7.88)    |
| Cyprus                                | -0.53 (-6.44, 5.76)    | 1.65 (-4.98, 8.75)    | —                       | 0.48 (-5.83, 7.21)   | 3.38 (-5.20, 12.73)  | 3.19 (0.28, 6.18)     | 8.35 (6.14, 10.62)   |
| Czech Republic                        | -6.29 (-8.68, -3.84)   | 2.91 (0.07, 5.83)     | 3.10 (-3.31, 9.93)      | -0.60 (-2.00, 0.83)  | -2.55 (-5.11, 0.09)  | 0.82 (0.12, 1.51)     | 7.44 (6.07, 8.83)    |
| Denmark                               | -3.04 (-5.76, -0.24)   | -1.88 (-5.96, 2.37)   | 2.37 (-16.99, 26.23)    | 1.04 (-2.47, 4.68)   | -3.39 (-7.26, 0.65)  | 0.19 (-0.56, 0.94)    | 3.70 (1.76, 5.67)    |
| Estonia                               | -1.49 (-6.51, 3.80)    | -3.08 (-8.86, 3.08)   | —                       | -0.33 (-7.56, 7.46)  | -3.86 (-9.46, 2.09)  | 2.27 (-2.49, 7.27)    | -0.32 (-4.54, 4.09)  |
| France*                               | 1.75 (-0.59, 4.14)     | 3.14 (-0.14, 6.53)    | -0.44 (-8.64, 8.50)     | 0.62 (-1.60, 2.89)   | -1.39 (-4.23, 1.53)  | 2.68 (1.64, 3.73)     | 3.62 (2.82, 4.43)    |
| Germany*                              | -3.00 (-7.02, 1.20)    | 6.78 (0.62, 13.32)    | 0.27 (-7.79, 9.04)      | 1.19 (-2.09, 4.58)   | 2.26 (-3.34, 8.18)   | 1.16 (-0.39, 2.72)    | 5.41 (1.77, 9.17)    |
| Iceland                               | -5.18 (-11.52, 1.61)   | —                     | —                       | 0.74 (-6.40, 8.42)   | -4.85 (-9.60, 0.15)  | 2.67 (-3.93, 9.72)    | -0.55 (-6.26, 5.51)  |
| Ireland                               | -1.70 (-4.53, 1.21)    | -1.78 (-5.17, 1.73)   | 1.26 (-3.30, 6.05)      | 3.07 (0.20, 6.03)    | -1.74 (-5.95, 2.67)  | 1.29 (0.29, 2.30)     | 10.71 (8.41, 13.06)  |
| Italy*                                | -0.26 (-3.51, 3.09)    | 3.89 (-0.21, 8.17)    | —                       | -1.75 (-6.32, 3.04)  | -6.29 (-8.47, -4.06) | 3.49 (2.12, 4.89)     | 6.86 (5.28, 8.46)    |
| Lithuania                             | 0.07 (-2.39, 2.59)     | -1.02 (-8.90, 7.54)   | -3.40 (-22.36, 20.21)   | 2.90 (-1.30, 7.28)   | -0.09 (-3.96, 3.93)  | 2.99 (0.82, 5.20)     | 8.68 (5.38, 12.07)   |
| Malta                                 | -3.06 (-9.87, 4.25)    | 1.67 (1.21, 2.13)     | —                       | 7.72 (3.51, 12.11)   | 3.17 (-4.49, 11.43)  | 4.03 (-0.40, 8.65)    | 0.77 (-3.41, 5.13)   |
| Netherlands                           | -0.86 (-2.51, 0.83)    | 4.40 (0.04, 8.96)     | 0.39 (-8.11, 9.67)      | 3.04 (1.84, 4.24)    | 1.65 (-0.13, 3.46)   | 3.39 (2.91, 3.87)     | 3.80 (2.96, 4.64)    |
| Norway                                | -3.07 (-6.48, 0.48)    | 7.06 (-0.44, 15.13)   | -4.48 (-11.47, 3.06)    | 4.72 (2.27, 7.24)    | -1.05 (-4.57, 2.61)  | 0.61 (-0.27, 1.50)    | 3.37 (1.74, 5.02)    |
| Poland*                               | -1.02 (-6.72, 5.01)    | 2.93 (-1.65, 7.73)    | —                       | -4.44 (-8.48, -0.23) | 4.87 (-2.39, 12.68)  | 5.74 (2.68, 8.88)     | 7.33 (3.60, 11.2)    |
| Slovenia                              | 1.20 (-2.15, 4.67)     | -1.15 (-7.43, 5.55)   | —                       | 1.89 (-3.39, 7.44)   | 0.91 (-3.43, 5.45)   | 0.70 (-0.71, 2.13)    | 6.86 (4.48, 9.30)    |
| Spain*                                | -1.06 (-3.62, 1.56)    | 0.44 (-4.00, 5.09)    | 0.70 (-1.58, 3.04)      | -0.10 (-2.94, 2.82)  | -2.52 (-4.31, -0.69) | 3.63 (1.98, 5.30)     | 2.90 (1.36, 4.46)    |
| Switzerland*                          | 0.69 (-4.77, 6.46)     | 5.44 (-1.75, 13.15)   | -2.64 (-15.00, 11.52)   | -1.99 (-4.81, 0.91)  | -4.29 (-10.91, 2.83) | -0.01 (-1.17, 1.17)   | 4.85 (2.65, 7.10)    |
| United Kingdom*                       | 0.77 (-0.20, 1.75)     | 3.05 (1.58, 4.55)     | 2.39 (-2.28, 7.28)      | 4.02 (2.97, 5.08)    | 0.81 (-0.53, 2.16)   | 0.45 (-0.03, 0.93)    | 6.25 (5.82, 6.67)    |
| <b>Oceania</b>                        |                        |                       |                         |                      |                      |                       |                      |
| Australia                             | 0.75 (-0.51, 2.01)     | 4.18 (0.86, 7.61)     | 17.33 (12.58, 22.28)    | 3.71 (2.61, 4.82)    | -1.15 (-2.98, 0.71)  | 1.20 (0.58, 1.82)     | 3.35 (2.82, 3.88)    |
| New Zealand                           | 0.03 (-1.97, 2.07)     | 4.10 (-2.72, 11.41)   | -1.21 (-8.45, 6.60)     | 3.98 (1.21, 6.82)    | 1.39 (-1.88, 4.76)   | -0.20 (-1.28, 0.89)   | 1.90 (-0.44, 4.29)   |

\*Sub-National

†An em-dash (—) denotes that too few cancer cases were observed to calculate the AAPC

Supplementary Table 6: Joinpoints for each country, for all 3 sex groups (M = males only, F = females only, and B = both males and females combined).<sup>†</sup>

| Cancer                                         | Sex                           | Continent     | Country                              | Joinpoint 1              |                        | Joinpoint 2          |                        | Joinpoint 3          |                         |
|------------------------------------------------|-------------------------------|---------------|--------------------------------------|--------------------------|------------------------|----------------------|------------------------|----------------------|-------------------------|
|                                                |                               |               |                                      | Period                   | APC (95% CI)           | Period               | APC (95% CI)           | Period               | APC (95% CI)            |
| All cancers excluding non-melanoma skin cancer | B                             | North America | United States of America             | 1998 - 2000              | 2.44 (0.41, 4.52)      | 2000 - 2009          | 0.94 (0.73, 1.15)      | 2009 - 2012          | -0.63 (-1.58, 0.34)     |
|                                                | B                             | North America | USA-Black                            | 1998 - 2004              | 0.92 (0.32, 1.52)      | 2004 - 2012          | 0.02 (-0.35, 0.39)     | —                    | —                       |
|                                                | B                             | North America | USA-White                            | 1998 - 2000              | 2.85 (0.51, 5.25)      | 2000 - 2009          | 1.10 (0.85, 1.34)      | 2009 - 2012          | -0.66 (-1.74, 0.43)     |
|                                                | B                             | Asia          | China                                | 1998 - 2002              | -2.35 (-4.67, 0.03)    | 2002 - 2012          | 2.61 (1.99, 3.22)      | —                    | —                       |
|                                                | B                             | Asia          | Philippines                          | 1998 - 2006              | -0.55 (-1.59, 0.49)    | 2006 - 2012          | -3.86 (-5.43, -2.27)   | —                    | —                       |
|                                                | B                             | Asia          | Republic of Korea                    | 1998 - 2002              | 3.10 (-1.12, 7.51)     | 2002 - 2012          | 8.49 (7.59, 9.40)      | —                    | —                       |
|                                                | B                             | Asia          | Thailand                             | 1998 - 2001              | 3.52 (0.03, 7.13)      | 2001 - 2004          | -3.53 (-9.94, 3.34)    | 2004 - 2012          | 0.63 (-0.17, 1.42)      |
|                                                | B                             | Asia          | Turkey                               | 1998 - 2006              | 5.15 (3.87, 6.45)      | 2006 - 2012          | 1.38 (-0.18, 2.96)     | —                    | —                       |
|                                                | M                             | South America | Brazil                               | 1998 - 2005              | 3.62 (0.67, 6.66)      | 2005 - 2012          | -4.31 (-6.90, -1.64)   | —                    | —                       |
|                                                | M                             | South America | Chile                                | 1998 - 2003              | 10.59 (-0.99, 23.53)   | 2003 - 2012          | -2.24 (-5.95, 1.60)    | —                    | —                       |
|                                                | M                             | North America | United States of America             | 1998 - 2000              | 1.91 (-0.21, 4.09)     | 2000 - 2008          | 0.57 (0.29, 0.85)      | 2008 - 2012          | -0.54 (-1.18, 0.11)     |
|                                                | M                             | North America | USA-Asian-Pacific Islander           | 1998 - 2002              | -1.69 (-4.50, 1.19)    | 2002 - 2012          | 1.15 (0.52, 1.79)      | —                    | —                       |
|                                                | M                             | North America | USA-White                            | 1998 - 2000              | 2.39 (0.00, 4.83)      | 2000 - 2008          | 0.72 (0.41, 1.03)      | 2008 - 2012          | -0.48 (-1.20, 0.25)     |
|                                                | M                             | Asia          | China                                | 1998 - 2003              | -1.52 (-3.46, 0.45)    | 2003 - 2012          | 1.77 (0.92, 2.63)      | —                    | —                       |
|                                                | M                             | Asia          | Republic of Korea                    | 1998 - 2005              | 2.45 (0.70, 4.23)      | 2005 - 2012          | 7.36 (5.76, 8.99)      | —                    | —                       |
|                                                | M                             | Europe        | Austria                              | 1998 - 2004              | 1.53 (0.32, 2.75)      | 2004 - 2008          | -1.61 (-5.04, 1.95)    | 2008 - 2012          | 2.00 (-0.30, 4.36)      |
|                                                | F                             | North America | United States of America             | 1998 - 2008              | 1.45 (1.16, 1.74)      | 2008 - 2012          | -0.18 (-1.27, 0.92)    | —                    | —                       |
|                                                | F                             | North America | USA-White                            | 1998 - 2000              | 3.14 (0.45, 5.91)      | 2000 - 2009          | 1.41 (1.13, 1.69)      | 2009 - 2012          | -0.58 (1.82, 0.68)      |
|                                                | F                             | Asia          | China                                | 1998 - 2002              | -2.57 (-5.13, 0.06)    | 2002 - 2012          | 3.07 (2.41, 3.73)      | —                    | —                       |
|                                                | F                             | Asia          | Philippines                          | 1998 - 2006              | 0.06 (-1.19, 1.33)     | 2006 - 2012          | -4.18 (-6.04, -2.29)   | —                    | —                       |
| F                                              | Asia                          | Thailand      | 1998 - 2001                          | 5.06 (0.52, 9.80)        | 2001 - 2004            | -3.49 (-11.69, 5.47) | 2004 - 2012            | -0.10 (-1.13, 0.94)  |                         |
| F                                              | Asia                          | Turkey        | 1998 - 2002                          | 3.16 (-2.07, 8.68)       | 2002 - 2005            | 10.22 (-4.43, 27.11) | 2005 - 2012            | 2.40 (0.77, 4.07)    |                         |
| Bladder                                        | B                             | North America | USA-American, Indian, Alaskan Native | 1998 - 2003              | -17.32 (-26.81, -6.61) | 2003 - 2007          | 31.87 (2.60, 69.49)    | 2007 - 2012          | -26.82 (-35.79, -16.59) |
|                                                | B                             | Europe        | United Kingdom                       | 1998 - 2002              | -14.36 (-21.53, -6.52) | 2002 - 2012          | -2.34 (-4.99, 0.39)    | —                    | —                       |
|                                                | M                             | Europe        | Norway                               | 1998 - 2001              | -26.41 (-51.66, 12.03) | 2001 - 2012          | 7.43 (0.91, 14.38)     | —                    | —                       |
|                                                | M                             | Europe        | United Kingdom                       | 1998 - 2002              | -15.15 (-24.67, -4.44) | 2002 - 2012          | -2.73 (-6.06, 0.71)    | —                    | —                       |
| Bone                                           | B                             | South America | Brazil                               | 1998 - 2006              | 9.27 (0.15, 19.23)     | 2006 - 2010          | -31.86 (-58.15, 10.93) | 2010 - 2012          | 160.36 (34.33, 404.63)  |
|                                                | B                             | North America | USA-Black                            | 1998 - 2008              | 0.65 (-1.19, 2.54)     | 2008 - 2012          | -6.62 (-13.23, 0.50)   | —                    | —                       |
|                                                | B                             | Asia          | Philippines                          | 1998 - 2009              | -0.60 (-3.54, 2.43)    | 2009 - 2012          | -19.87 (-38.53, 4.46)  | —                    | —                       |
|                                                | B                             | Europe        | Lithuania                            | 1998 - 2010              | 3.61 (0.70, 6.60)      | 2010 - 2012          | -47.88 (-76.11, 13.68) | —                    | —                       |
|                                                | B                             | Europe        | United Kingdom                       | 1998 - 2002              | -4.84 (-11.33, 2.14)   | 2002 - 2012          | 2.27 (0.51, 4.06)      | —                    | —                       |
|                                                | M                             | South America | Brazil                               | 1998 - 2005              | 12.80 (1.48, 25.38)    | 2005 - 2009          | -35.94 (-61.83, 7.51)  | 2009 - 2012          | 94.45 (32.00, 186.46)   |
|                                                | M                             | North America | USA-White                            | 1998 - 2007              | 0.64 (-0.63, 1.93)     | 2007 - 2010          | -5.85 (-18.61, 8.91)   | 2010 - 2012          | 7.77 (-6.81, 24.63)     |
|                                                | M                             | Asia          | China                                | 1998 - 2010              | -3.31 (-5.93, -0.61)   | 2010 - 2012          | 26.75 (-19.59, 99.79)  | —                    | —                       |
|                                                | M                             | Europe        | United Kingdom                       | 1998 - 2000              | -11.22 (-28.57, 10.36) | 2000 - 2012          | 2.21 (0.88, 3.55)      | —                    | —                       |
|                                                | F                             | North America | USA-Black                            | 1998 - 2002              | -5.65 (-15.73, 5.63)   | 2002 - 2005          | 15.14 (-16.77, 59.28)  | 2005 - 2012          | -5.27 (-9.38, -0.98)    |
|                                                | F                             | Europe        | France                               | 1998 - 2000              | -32.66 (-59.71, 12.56) | 2000 - 2012          | 1.20 (-2.70, 5.27)     | —                    | —                       |
|                                                | Brain, central nervous system | B             | North America                        | United States of America | 1998 - 2006            | 0.34 (-0.17, 0.85)   | 2006 - 2012            | -0.91 (-1.70, -0.12) | —                       |
| B                                              |                               | Europe        | Ireland                              | 1998 - 2006              | -5.16 (-8.84, -1.33)   | 2006 - 2012          | 5.96 (-0.11, 12.39)    | —                    | —                       |
| B                                              |                               | Europe        | Lithuania                            | 1998 - 2009              | -0.82 (-2.88, 1.27)    | 2009 - 2012          | 12.27 (-3.18, 30.19)   | —                    | —                       |
| M                                              |                               | North America | United States of America             | 1998 - 2007              | 0.24 (-0.25, 0.73)     | 2007 - 2012          | -1.27 (-2.49, -0.03)   | —                    | —                       |
| M                                              |                               | Europe        | Lithuania                            | 1998 - 2010              | -2.25 (-5.18, 0.76)    | 2010 - 2012          | 37.25 (-16.28, 125.02) | —                    | —                       |

|                            |   |               |                            |             |                        |             |                        |                                     |
|----------------------------|---|---------------|----------------------------|-------------|------------------------|-------------|------------------------|-------------------------------------|
|                            | F | Europe        | Ireland                    | 1998 - 2006 | -8.03 (-13.36, -2.36)  | 2006 - 2012 | 10.57 (1.42, 20.54)    | —                                   |
|                            | F | Europe        | Poland                     | 1998 - 2003 | -17.01 (-31.42, 0.42)  | 2003 - 2012 | 5.08 (-3.32, 14.21)    | —                                   |
| Breast                     | F | Asia          | Republic of Korea          | 1998 - 2002 | 9.75 (3.98, 15.85)     | 2002 - 2012 | 3.76 (2.61, 4.93)      | —                                   |
|                            | F | Europe        | Czech Republic             | 1998 - 2008 | 2.90 (1.40, 4.41)      | 2008 - 2012 | 7.79 (2.81, 13.00)     | —                                   |
|                            | F | Europe        | United Kingdom             | 1998 - 2008 | -0.32 (-0.71, 0.06)    | 2008 - 2012 | 1.63 (0.03, 3.25)      | —                                   |
| Cervix uteri               | F | Africa        | Uganda                     | 1998 - 2003 | -10.07 (-20.57, 1.82)  | 2003 - 2012 | 4.62 (0.05, 9.39)      | —                                   |
|                            | F | South America | Brazil                     | 1998 - 2002 | 8.66 (-10.89, 32.51)   | 2002 - 2006 | -21.01 (-43.53, 10.51) | 2006 - 2012 4.68 (-6.69, 17.44)     |
|                            | F | South America | Bulgaria                   | 1998 - 2002 | 3.46 (-1.38, 8.54)     | 2002 - 2010 | -1.30 (-3.28, 0.71)    | 2010 - 2012 -16.57 (-30.20, -0.29)  |
|                            | F | South America | Chile                      | 1998 - 2010 | -3.53 (-7.51, 0.62)    | 2010 - 2012 | 46.14 (-23.05, 177.54) | —                                   |
|                            | F | Asia          | Thailand                   | 1998 - 2000 | 15.70 (-15.21, 57.88)  | 2000 - 2012 | -4.82 (-6.75, -2.86)   | —                                   |
|                            | F | Europe        | Netherlands                | 1998 - 2002 | -5.63 (-11.64, 0.78)   | 2002 - 2012 | 3.10 (1.33, 4.91)      | —                                   |
|                            | F | Europe        | Spain                      | 1998 - 2009 | -1.24 (-4.39, 2.01)    | 2009 - 2012 | -25.24 (-46.64, 4.74)  | —                                   |
|                            | F | Europe        | Switzerland                | 1998 - 2005 | -6.36 (-11.50, -0.93)  | 2005 - 2012 | 3.95 (-1.87, 10.11)    | —                                   |
|                            | F | Oceania       | Australia                  | 1998 - 2001 | -9.46 (-17.88, -0.18)  | 2001 - 2012 | 2.66 (1.36, 3.99)      | —                                   |
|                            | F | Oceania       | New Zealand                | 1998 - 2000 | 20.78 (-19.68, 81.62)  | 2000 - 2004 | -14.01 (-30.45, 6.32)  | 2004 - 2012 2.09 (-3.00, 7.44)      |
| Colon                      | B | South America | Brazil                     | 1998 - 2006 | 15.95 (7.12, 25.52)    | 2006 - 2012 | -18.81 (-28.27, -8.09) | —                                   |
|                            | B | Europe        | United Kingdom             | 1998 - 2001 | -2.35 (-11.26, 7.46)   | 2001 - 2010 | 5.53 (3.58, 7.53)      | 2010 - 2012 27.61 (12.26, 45.05)    |
|                            | B | Oceania       | Australia                  | 1998 - 2006 | 0.52 (-2.27, 3.39)     | 2006 - 2012 | 9.01 (5.01, 13.16)     | —                                   |
|                            | M | South America | Brazil                     | 1998 - 2006 | 17.61 (0.94, 37.04)    | 2006 - 2012 | -19.05 (-36.88, 3.83)  | —                                   |
|                            | M | Europe        | Spain                      | 1998 - 2004 | -9.56 (-16.72, -1.80)  | 2004 - 2012 | 5.30 (-0.86, 11.83)    | —                                   |
|                            | M | Europe        | United Kingdom             | 1998 - 2010 | 3.91 (1.98, 5.87)      | 2010 - 2012 | 26.81 (0.13, 60.60)    | —                                   |
|                            | M | Oceania       | Australia                  | 1998 - 2003 | -3.80 (-9.27, 2.01)    | 2003 - 2012 | 7.13 (4.91, 9.41)      | —                                   |
|                            | F | South America | Brazil                     | 1998 - 2003 | -7.88 (-25.04, 13.20)  | 2003 - 2006 | 52.01 (-33.24, 246.15) | 2006 - 2012 -22.12 (-31.67, -11.24) |
|                            | F | Asia          | Japan                      | 1998 - 2009 | 3.52 (1.60, 5.48)      | 2009 - 2012 | -12.59 (-24.73, 1.52)  | —                                   |
|                            | F | Europe        | United Kingdom             | 1998 - 2009 | 3.68 (1.28, 6.13)      | 2009 - 2012 | 24.27 (8.99, 41.69)    | —                                   |
|                            | F | Oceania       | Australia                  | 1998 - 2008 | 1.77 (-0.60, 4.19)     | 2008 - 2012 | 12.44 (3.87, 21.71)    | —                                   |
| Connective and soft tissue | B | South America | Bulgaria                   | 1998 - 2005 | 5.86 (0.88, 11.07)     | 2005 - 2012 | -4.07 (-8.87, 0.98)    | —                                   |
|                            | B | North America | United States of America   | 1998 - 2009 | 0.82 (0.22, 1.41)      | 2009 - 2012 | -3.84 (-7.53, 0.00)    | —                                   |
|                            | B | North America | USA-Black                  | 1998 - 2006 | 1.82 (0.07, 3.60)      | 2006 - 2012 | -2.02 (-4.38, 0.41)    | —                                   |
|                            | B | North America | USA-White                  | 1998 - 2009 | 0.96 (0.21, 1.72)      | 2009 - 2012 | -4.25 (-9.49, 1.30)    | —                                   |
|                            | B | Asia          | China                      | 1998 - 2005 | -5.62 (-9.59, -1.47)   | 2005 - 2012 | 3.20 (-1.32, 7.93)     | —                                   |
|                            | M | South America | Bulgaria                   | 1998 - 2004 | 9.31 (-0.53, 20.12)    | 2004 - 2012 | -8.75 (-14.29, -2.84)  | —                                   |
|                            | M | North America | USA-Asian-Pacific Islander | 1998 - 2000 | -30.48 (-55.46, 8.50)  | 2000 - 2009 | 6.11 (0.75, 11.76)     | 2009 - 2012 -15.28 (-32.08, 5.68)   |
|                            | M | Oceania       | New Zealand                | 1998 - 2006 | 7.49 (-0.38, 15.98)    | 2006 - 2012 | -10.75 (-21.28, 1.20)  | —                                   |
|                            | F | Asia          | China                      | 1998 - 2007 | -7.09 (-10.77, -3.27)  | 2007 - 2012 | 10.65 (-0.18, 22.67)   | —                                   |
|                            | F | Asia          | Thailand                   | 1998 - 2001 | 74.17 (-17.82, 269.16) | 2001 - 2012 | -7.15 (-14.46, 0.79)   | —                                   |
| Corpus uteri               | F | Asia          | Israel                     | 1998 - 2002 | 28.35 (-1.03, 66.47)   | 2002 - 2012 | -3.32 (-8.12, 1.75)    | —                                   |
|                            | F | Asia          | Philippines                | 1998 - 2006 | 6.08 (-0.67, 13.28)    | 2006 - 2012 | -10.38 (-19.13, -0.68) | —                                   |
|                            | F | Asia          | Thailand                   | 1998 - 2007 | -8.25 (-14.85, -1.13)  | 2007 - 2012 | 24.39 (5.19, 47.09)    | —                                   |
|                            | F | Europe        | Belarus                    | 1998 - 2004 | -5.23 (-11.26, 1.21)   | 2004 - 2012 | 8.45 (4.31, 12.75)     | —                                   |
| Eye                        | B | Africa        | Uganda                     | 1998 - 2005 | -6.12 (-13.39, 1.76)   | 2005 - 2010 | 12.73 (-3.54, 31.73)   | 2010 - 2012 -31.00 (-59.52, 17.63)  |
| Hodgkin lymphoma           | B | North America | United States of America   | 1998 - 2008 | 0.16 (-0.13, 0.44)     | 2008 - 2012 | -1.93 (-3.09, -0.75)   | —                                   |
|                            | B | North America | USA-Asian-Pacific Islander | 1998 - 2009 | 5.12 (2.63, 7.67)      | 2009 - 2012 | -7.51 (-19.99, 6.92)   | —                                   |
|                            | B | North America | USA-White                  | 1998 - 2007 | 0.13 (-0.28, 0.54)     | 2007 - 2012 | -1.74 (-2.71, -0.77)   | —                                   |
|                            | B | Asia          | Israel                     | 1998 - 2004 | 2.21 (0.34, 4.12)      | 2004 - 2007 | -7.67 (-16.92, 2.62)   | 2007 - 2012 2.17 (-0.21, 4.60)      |

|                                   |   |               |                            |             |                        |             |                        |             |                        |
|-----------------------------------|---|---------------|----------------------------|-------------|------------------------|-------------|------------------------|-------------|------------------------|
|                                   | B | Europe        | Austria                    | 1998 - 2010 | 1.72 (0.43, 3.03)      | 2010 - 2012 | -15.05 (-32.58, 7.03)  |             | —                      |
|                                   | B | Europe        | Belarus                    | 1998 - 2000 | -13.46 (-28.83, 5.22)  | 2000 - 2004 | 7.15 (-2.72, 18.03)    | 2004 - 2012 | -1.43 (-3.53, 0.71)    |
|                                   | B | Europe        | France                     | 1998 - 2000 | 32.62 (-10.65, 96.83)  | 2000 - 2012 | 0.83 (-1.07, 2.77)     |             | —                      |
|                                   | B | Europe        | Germany                    | 1998 - 2010 | -2.47 (-6.42, 1.64)    | 2010 - 2012 | 46.96 (-16.83, 159.66) |             | —                      |
|                                   | B | Europe        | Malta                      | 1998 - 2000 | -33.31 (-64.18, 24.19) | 2000 - 2012 | 4.89 (1.08, 8.83)      |             | —                      |
|                                   | B | Oceania       | New Zealand                | 1998 - 2010 | 2.93 (0.04, 5.90)      | 2010 - 2012 | -23.34 (-54.57, 29.35) |             | —                      |
|                                   | M | North America | USA-Asian-Pacific Islander | 1998 - 2008 | 5.96 (3.00, 9.00)      | 2008 - 2012 | -5.78 (-14.23, 3.50)   |             | —                      |
|                                   | M | Asia          | China                      | 1998 - 2005 | -8.20 (-18.82, 3.80)   | 2005 - 2012 | 10.23 (-2.28, 24.34)   |             | —                      |
|                                   | M | Asia          | Philippines                | 1998 - 2004 | 16.06 (3.90, 29.63)    | 2004 - 2007 | -24.11 (-62.71, 54.44) | 2007 - 2012 | 24.27 (10.60, 39.62)   |
|                                   | F | North America | United States of America   | 1998 - 2002 | 1.59 (-0.04, 3.25)     | 2002 - 2009 | -0.35 (-1.20, 0.50)    | 2009 - 2012 | -2.64 (-5.21, -0.00)   |
|                                   | F | North America | USA-White                  | 1998 - 2005 | 0.81 (-0.22, 1.84)     | 2005 - 2012 | -1.67 (-2.66, -0.67)   |             | —                      |
|                                   | F | Europe        | France                     | 1998 - 2000 | 49.88 (-17.88, 173.55) | 2000 - 2012 | -0.79 (-3.57, 2.08)    |             | —                      |
|                                   | F | Europe        | Germany                    | 1998 - 2010 | -4.24 (-8.15, -0.16)   | 2010 - 2012 | 59.43 (-13.14, 192.63) |             | —                      |
| Kaposi sarcoma                    | B | North America | USA-White                  | 1998 - 2000 | -16.00 (-23.49, -7.77) | 2000 - 2007 | -2.99 (-5.06, -0.87)   | 2007 - 2012 | -8.53 (-11.31, -5.66)  |
|                                   | B | Europe        | Netherlands                | 1998 - 2000 | 36.52 (-18.34, 128.25) | 2000 - 2012 | -2.02 (-5.00, 1.05)    |             | —                      |
|                                   | B | Europe        | United Kingdom             | 1998 - 2007 | 7.20 (2.20, 12.44)     | 2007 - 2012 | -7.84 (-17.57, 3.04)   |             | —                      |
|                                   | M | North America | USA-White                  | 1998 - 2000 | -15.25 (-22.25, -7.27) | 2000 - 2007 | -2.70 (-4.69, -0.68)   | 2007 - 2012 | -8.82 (-11.45, -6.12)  |
|                                   | M | Europe        | United Kingdom             | 1998 - 2004 | 0.40 (-6.62, 7.95)     | 2004 - 2007 | 17.56 (-21.26, 75.53)  | 2007 - 2012 | -10.34 (-18.70, -1.12) |
| Kidney and renal pelvis           | B | North America | Canada                     | 1998 - 2008 | 1.87 (0.99, 2.75)      | 2008 - 2012 | 5.68 (2.41, 9.06)      |             | —                      |
|                                   | B | North America | United States of America   | 1998 - 2008 | 7.33 (6.75, 7.91)      | 2008 - 2012 | 1.68 (-0.03, 3.42)     |             | —                      |
|                                   | B | North America | USA-White                  | 1998 - 2008 | 8.09 (7.51, 8.67)      | 2008 - 2012 | 1.98 (0.17, 3.82)      |             | —                      |
|                                   | B | Oceania       | Australia                  | 1998 - 2000 | -9.34 (-27.69, 13.66)  | 2000 - 2012 | 3.22 (1.95, 4.50)      |             | —                      |
|                                   | M | North America | United States of America   | 1998 - 2008 | 7.20 (6.09, 8.31)      | 2008 - 2012 | 1.52 (-2.08, 5.25)     |             | —                      |
|                                   | M | North America | USA-White                  | 1998 - 2006 | 8.64 (6.92, 10.38)     | 2006 - 2012 | 3.39 (1.26, 5.56)      |             | —                      |
|                                   | M | Europe        | Italy                      | 1998 - 2007 | 9.37 (0.52, 18.99)     | 2007 - 2012 | -13.15 (-28.83, 5.98)  |             | —                      |
|                                   | M | Europe        | Netherlands                | 1998 - 2001 | -17.47 (-44.65, 23.06) | 2001 - 2006 | 22.01 (-3.72, 54.62)   | 2006 - 2012 | -4.83 (-14.69, 6.17)   |
|                                   | F | North America | United States of America   | 1998 - 2009 | 7.35 (6.37, 8.33)      | 2009 - 2012 | 0.24 (-4.88, 5.63)     |             | —                      |
|                                   | F | North America | USA-Asian-Pacific Islander | 1998 - 2008 | 7.56 (3.60, 11.68)     | 2008 - 2012 | -6.31 (-16.68, 5.35)   |             | —                      |
|                                   | F | North America | USA-White                  | 1998 - 2007 | 8.96 (7.41, 10.52)     | 2007 - 2012 | 3.16 (0.44, 5.95)      |             | —                      |
|                                   | F | Europe        | Lithuania                  | 1998 - 2008 | 7.16 (3.77, 10.66)     | 2008 - 2012 | -17.04 (-28.95, -3.13) |             | —                      |
| Leukaemia                         | B | South America | Brazil                     | 1998 - 2003 | 14.87 (-5.38, 39.46)   | 2003 - 2012 | -13.35 (-20.40, -5.67) |             | —                      |
|                                   | B | South America | Chile                      | 1998 - 2001 | -24.47 (-55.55, 28.35) | 2001 - 2005 | 38.22 (-16.73, 129.45) | 2005 - 2012 | -15.04 (-25.29, -3.37) |
|                                   | B | Asia          | Japan                      | 1998 - 2005 | -2.63 (-6.16, 1.03)    | 2005 - 2012 | 5.63 (1.67, 9.74)      |             | —                      |
|                                   | B | Asia          | Philippines                | 1998 - 2003 | 7.67 (1.02, 14.75)     | 2003 - 2012 | -5.08 (-7.42, -2.68)   |             | —                      |
|                                   | B | Europe        | Italy                      | 1998 - 2002 | 13.50 (2.22, 26.02)    | 2002 - 2005 | -18.18 (-40.82, 13.13) | 2005 - 2012 | 5.01 (0.31, 9.93)      |
|                                   | M | Asia          | Japan                      | 1998 - 2005 | -3.20 (-6.88, 0.63)    | 2005 - 2012 | 7.05 (2.92, 11.34)     |             | —                      |
|                                   | M | Asia          | Philippines                | 1998 - 2003 | 9.55 (0.40, 19.53)     | 2003 - 2012 | -4.53 (-7.68, -1.27)   |             | —                      |
|                                   | M | Asia          | Turkey                     | 1998 - 2009 | 3.52 (1.33, 5.76)      | 2009 - 2012 | -8.27 (-20.74, 6.16)   |             | —                      |
|                                   | M | Europe        | Denmark                    | 1998 - 2003 | -8.49 (-13.98, -2.65)  | 2003 - 2006 | 20.65 (-8.11, 58.40)   | 2006 - 2012 | -5.38 (-9.66, -0.90)   |
|                                   | F | South America | Brazil                     | 1998 - 2001 | 63.86 (-32.88, 300.05) | 2001 - 2012 | -11.26 (-19.15, -2.61) |             | —                      |
|                                   | F | South America | Bulgaria                   | 1998 - 2002 | -14.91 (-32.85, 7.81)  | 2002 - 2012 | 6.52 (-0.41, 13.93)    |             | —                      |
|                                   | F | Asia          | Philippines                | 1998 - 2003 | 5.52 (-2.32, 14.00)    | 2003 - 2012 | -5.41 (-8.30, -2.43)   |             | —                      |
| Lip, oral cavity and pharynx      | B | Europe        | Norway                     | 1998 - 2003 | -13.56 (-29.24, 5.60)  | 2003 - 2012 | 10.00 (1.97, 18.66)    |             | —                      |
|                                   | M | Asia          | India                      | 1998 - 2000 | 57.88 (14.28, 118.10)  | 2000 - 2004 | -5.51 (-15.47, 5.62)   | 2004 - 2012 | 8.72 (6.36, 11.12)     |
|                                   | F | Europe        | United Kingdom             | 1998 - 2002 | -2.67 (-7.93, 2.89)    | 2002 - 2012 | 4.33 (3.01, 5.67)      |             | —                      |
| Liver and intrahepatic bile ducts | B | Africa        | Uganda                     | 1998 - 2001 | -16.25 (-42.90, 22.84) | 2001 - 2006 | 24.76 (-1.06, 57.32)   | 2006 - 2012 | -4.00 (-11.51, 4.14)   |

|                                                   |   |               |                          |             |                          |             |                        |                                    |
|---------------------------------------------------|---|---------------|--------------------------|-------------|--------------------------|-------------|------------------------|------------------------------------|
|                                                   | B | North America | United States of America | 1998 - 2009 | 1.60 (0.56, 2.65)        | 2009 - 2012 | -4.62 (-11.61, 2.92)   | —                                  |
|                                                   | B | North America | USA-Black                | 1998 - 2004 | 7.49 (0.17, 15.35)       | 2004 - 2012 | -3.47 (-7.47, 0.69)    | —                                  |
|                                                   | M | North America | United States of America | 1998 - 2005 | 3.65 (0.69, 6.70)        | 2005 - 2012 | -2.22 (-4.95, 0.60)    | —                                  |
|                                                   | M | North America | USA-Black                | 1998 - 2004 | 7.49 (0.17, 15.35)       | 2004 - 2012 | -3.47 (-7.47, 0.69)    | —                                  |
|                                                   | F | North America | Canada                   | 1998 - 2001 | -25.00 (-47.74, 7.65)    | 2001 - 2012 | 9.69 (4.05, 15.62)     | —                                  |
|                                                   | F | Asia          | Thailand                 | 1998 - 2001 | 29.36 (-12.87, 92.06)    | 2001 - 2012 | -6.54 (-11.14, -1.70)  | —                                  |
|                                                   | F | Asia          | Turkey                   | 1998 - 2002 | 42.37 (-11.26, 128.42)   | 2002 - 2012 | -8.11 (-15.88, 0.37)   | —                                  |
|                                                   | F | Europe        | Austria                  | 1998 - 2002 | -30.11 (-51.86, 1.45)    | 2002 - 2008 | 24.68 (-10.48, 73.65)  | 2008 - 2012 -37.23 (-62.61, 5.39)  |
| Lung (incl. trachea)                              | F | Europe        | Netherlands              | 1998 - 2007 | -2.49 (-4.16, -0.79)     | 2007 - 2010 | 10.90 (-8.99, 35.14)   | 2010 - 2012 -21.56 (-37.43, -1.68) |
| Melanoma of skin                                  | B | North America | United States of America | 1998 - 2005 | 3.65 (1.84, 5.49)        | 2005 - 2012 | -3.33 (-4.97, -1.66)   | —                                  |
|                                                   | B | North America | USA-White                | 1998 - 2005 | 3.95 (2.21, 5.72)        | 2005 - 2012 | -3.05 (-4.68, -1.40)   | —                                  |
|                                                   | B | Europe        | Denmark                  | 1998 - 2010 | 8.64 (6.70, 10.61)       | 2010 - 2012 | -6.44 (-27.48, 20.71)  | —                                  |
|                                                   | B | Europe        | Italy                    | 1998 - 2006 | 7.06 (3.00, 11.28)       | 2006 - 2012 | -2.65 (-7.80, 2.79)    | —                                  |
|                                                   | B | Europe        | Netherlands              | 1998 - 2009 | 3.30 (2.27, 4.34)        | 2009 - 2012 | -3.29 (-10.02, 3.95)   | —                                  |
|                                                   | B | Europe        | Switzerland              | 1998 - 2002 | 11.04 (1.57, 21.39)      | 2002 - 2012 | -3.85 (-5.86, -1.79)   | —                                  |
|                                                   | B | Europe        | United Kingdom           | 1998 - 2005 | 5.65 (3.86, 7.47)        | 2005 - 2012 | -0.53 (-2.04, 1.00)    | —                                  |
|                                                   | B | Oceania       | New Zealand              | 1998 - 2002 | 4.60 (-1.61, 11.21)      | 2002 - 2012 | -4.30 (-5.80, -2.78)   | —                                  |
|                                                   | M | South America | Bulgaria                 | 1998 - 2004 | -9.12 (-20.54, 3.93)     | 2004 - 2012 | 9.27 (0.47, 18.85)     | —                                  |
|                                                   | M | North America | United States of America | 1998 - 2002 | 5.41 (1.87, 9.07)        | 2002 - 2012 | -2.52 (-3.34, -1.70)   | —                                  |
|                                                   | M | North America | USA-White                | 1998 - 2002 | 5.55 (1.99, 9.23)        | 2002 - 2012 | -2.19 (-3.05, -1.33)   | —                                  |
|                                                   | M | Europe        | Austria                  | 1998 - 2004 | 11.74 (3.40, 20.75)      | 2004 - 2007 | -12.28 (-42.96, 34.88) | 2007 - 2012 8.94 (-0.90, 19.77)    |
|                                                   | M | Europe        | Norway                   | 1998 - 2006 | -4.22 (-7.80, -0.50)     | 2006 - 2012 | 5.80 (-0.18, 12.12)    | —                                  |
|                                                   | M | Europe        | Switzerland              | 1998 - 2005 | 7.17 (3.04, 11.46)       | 2005 - 2012 | -7.77 (-11.28, -4.12)  | —                                  |
|                                                   | M | Europe        | United Kingdom           | 1998 - 2006 | 4.33 (2.34, 6.35)        | 2006 - 2012 | -0.49 (-3.18, 2.28)    | —                                  |
|                                                   | M | Oceania       | New Zealand              | 1998 - 2010 | -1.20 (-2.74, 0.36)      | 2010 - 2012 | -20.10 (-41.94, 9.95)  | —                                  |
|                                                   | F | North America | United States of America | 1998 - 2005 | 4.80 (2.88, 6.76)        | 2005 - 2012 | -3.20 (-4.88, -1.50)   | —                                  |
|                                                   | F | North America | USA-White                | 1998 - 2005 | 5.13 (3.26, 7.03)        | 2005 - 2012 | -2.97 (-4.63, -1.27)   | —                                  |
|                                                   | F | Asia          | China                    | 1998 - 2002 | -24.07 (-49.64, 14.50)   | 2002 - 2012 | 10.58 (2.23, 19.61)    | —                                  |
|                                                   | F | Asia          | Israel                   | 1998 - 2002 | -7.52 (-13.61, -1.00)    | 2002 - 2005 | 7.56 (-13.01, 32.98)   | 2005 - 2012 -5.08 (-7.64, -2.45)   |
|                                                   | F | Europe        | Denmark                  | 1998 - 2009 | 9.05 (6.97, 11.16)       | 2009 - 2012 | -3.28 (-13.93, 8.68)   | —                                  |
|                                                   | F | Europe        | Italy                    | 1998 - 2007 | 7.84 (2.02, 13.99)       | 2007 - 2012 | -7.17 (-18.40, 5.61)   | —                                  |
|                                                   | F | Europe        | Netherlands              | 1998 - 2009 | 3.61 (2.10, 5.14)        | 2009 - 2012 | -5.95 (-15.52, 4.72)   | —                                  |
|                                                   | F | Europe        | Switzerland              | 1998 - 2000 | 25.57 (-8.69, 72.68)     | 2000 - 2012 | -2.75 (-4.40, -1.08)   | —                                  |
|                                                   | F | Europe        | United Kingdom           | 1998 - 2005 | 6.10 (4.34, 7.89)        | 2005 - 2012 | -0.84 (-2.28, 0.63)    | —                                  |
|                                                   | F | Oceania       | New Zealand              | 1998 - 2002 | 5.71 (-1.41, 13.33)      | 2002 - 2012 | -4.55 (-6.22, -2.85)   | —                                  |
| Multiple myeloma and immunoproliferative diseases | B | Asia          | Israel                   | 1998 - 2000 | 139.87 (-64.13, 1504.07) | 2000 - 2009 | -11.40 (-20.20, -1.62) | 2009 - 2012 28.61 (-19.03, 104.28) |
|                                                   | M | Asia          | Israel                   | 1998 - 2000 | 140.24 (-64.71, 1535.22) | 2000 - 2007 | -14.11 (-29.61, 4.80)  | 2007 - 2012 18.12 (-5.47, 47.60)   |
|                                                   | F | North America | United States of America | 1998 - 2001 | 10.38 (-0.47, 22.40)     | 2001 - 2012 | 0.62 (-0.88, 2.13)     | —                                  |
| Non-Hodgkin lymphoma                              | B | Africa        | Uganda                   | 1998 - 2006 | 12.40 (3.35, 22.23)      | 2006 - 2012 | -8.90 (-18.25, 1.53)   | —                                  |
|                                                   | B | North America | United States of America | 1998 - 2009 | -0.16 (-0.47, 0.15)      | 2009 - 2012 | -2.10 (-4.46, 0.32)    | —                                  |
|                                                   | B | North America | USA-Black                | 1998 - 2005 | 0.23 (-0.89, 1.36)       | 2005 - 2012 | -2.34 (-3.43, -1.24)   | —                                  |
|                                                   | B | North America | USA-White                | 1998 - 2010 | -0.10 (-0.38, 0.19)      | 2010 - 2012 | -3.17 (-7.66, 1.53)    | —                                  |
|                                                   | B | Europe        | Denmark                  | 1998 - 2003 | -5.13 (-11.64, 1.86)     | 2003 - 2012 | 3.32 (0.40, 6.32)      | —                                  |
|                                                   | B | Europe        | United Kingdom           | 1998 - 2006 | -0.33 (-1.15, 0.49)      | 2006 - 2012 | 2.58 (1.32, 3.85)      | —                                  |
|                                                   | M | Africa        | Uganda                   | 1998 - 2000 | -49.32 (-84.27, 63.30)   | 2000 - 2005 | 39.53 (-7.60, 110.70)  | 2005 - 2012 -8.85 (-19.01, 2.58)   |

|                 |   |               |                                      |             |                        |             |                        |             |                      |
|-----------------|---|---------------|--------------------------------------|-------------|------------------------|-------------|------------------------|-------------|----------------------|
|                 | M | North America | USA-White                            | 1998 - 2010 | -0.35 (-0.67, -0.03)   | 2010 - 2012 | -3.81 (-9.39, 2.11)    |             | —                    |
|                 | M | Europe        | Cyprus                               | 1998 - 2006 | 12.67 (-0.91, 28.12)   | 2006 - 2012 | -14.60 (-30.34, 4.70)  |             | —                    |
|                 | F | North America | USA-Black                            | 1998 - 2005 | 2.14 (-0.44, 4.80)     | 2005 - 2012 | -3.09 (-5.49, -0.63)   |             | —                    |
|                 | F | Europe        | Switzerland                          | 1998 - 2009 | -4.33 (-8.10, -0.41)   | 2009 - 2012 | 20.97 (-8.31, 59.61)   |             | —                    |
|                 | F | Europe        | United Kingdom                       | 1998 - 2009 | 0.01 (-1.15, 1.19)     | 2009 - 2012 | 6.94 (-1.51, 16.12)    |             | —                    |
| Oesophagus      | M | Europe        | France                               | 1998 - 2004 | -21.16 (-41.74, 6.70)  | 2004 - 2012 | 12.78 (-5.20, 34.17)   |             | —                    |
|                 | M | Europe        | Ireland                              | 1998 - 2001 | 13.57 (-19.29, 59.82)  | 2001 - 2004 | -31.44 (-67.74, 45.71) | 2004 - 2012 | 11.12 (2.08, 20.95)  |
| Ovary           | F | North America | USA-American, Indian, Alaskan Native | 1998 - 2006 | -9.70 (-19.09, 0.77)   | 2006 - 2012 | 13.26 (-0.96, 29.52)   |             | —                    |
|                 | F | Asia          | China                                | 1998 - 2006 | 11.68 (3.18, 20.87)    | 2006 - 2012 | -9.00 (-18.30, 1.35)   |             | —                    |
|                 | F | Asia          | Philippines                          | 1998 - 2008 | 2.70 (-0.13, 5.62)     | 2008 - 2012 | -9.11 (-19.12, 2.13)   |             | —                    |
|                 | F | Europe        | Belarus                              | 1998 - 2005 | -0.75 (-4.89, 3.57)    | 2005 - 2012 | 9.32 (5.26, 13.54)     |             | —                    |
|                 | F | Europe        | United Kingdom                       | 1998 - 2000 | -10.93 (-23.88, 4.22)  | 2000 - 2012 | 1.73 (0.74, 2.74)      |             | —                    |
| Prostate        | M | North America | United States of America             | 1998 - 2009 | 6.38 (3.97, 8.84)      | 2009 - 2012 | -15.06 (-31.82, 5.82)  |             | —                    |
|                 | M | North America | USA-Black                            | 1998 - 2009 | 8.74 (5.80, 11.77)     | 2009 - 2012 | -11.44 (-27.02, 7.46)  |             | —                    |
|                 | M | North America | USA-White                            | 1998 - 2009 | 5.47 (3.28, 7.71)      | 2009 - 2012 | -16.56 (-32.51, 3.16)  |             | —                    |
| Rectum and anus | B | Asia          | Kuwait                               | 1998 - 2010 | -5.43 (-12.14, 1.79)   | 2010 - 2012 | 92.07 (-13.27, 325.38) |             | —                    |
|                 | B | Asia          | Thailand                             | 1998 - 2005 | -7.37 (-13.64, -0.66)  | 2005 - 2012 | 13.62 (6.13, 21.63)    |             | —                    |
|                 | B | Europe        | Belarus                              | 1998 - 2008 | -2.80 (-6.59, 1.15)    | 2008 - 2012 | 15.52 (0.40, 32.92)    |             | —                    |
|                 | B | Europe        | Denmark                              | 1998 - 2001 | -21.21 (-42.28, 7.56)  | 2001 - 2012 | 5.38 (0.17, 10.86)     |             | —                    |
|                 | B | Europe        | Lithuania                            | 1998 - 2007 | -4.33 (-11.98, 3.98)   | 2007 - 2012 | 21.26 (-0.54, 47.82)   |             | —                    |
|                 | M | North America | United States of America             | 1998 - 2008 | 2.28 (1.63, 2.92)      | 2008 - 2012 | -0.99 (-3.47, 1.56)    |             | —                    |
|                 | M | North America | USA-Black                            | 1998 - 2008 | 3.12 (1.19, 5.09)      | 2008 - 2012 | -5.28 (-12.06, 2.03)   |             | —                    |
|                 | M | Asia          | Thailand                             | 1998 - 2005 | -11.21 (-23.96, 3.67)  | 2005 - 2012 | 16.66 (1.23, 34.44)    |             | —                    |
|                 | F | Asia          | Japan                                | 1998 - 2003 | -11.34 (-19.94, -1.82) | 2003 - 2008 | 20.95 (6.40, 37.49)    | 2008 - 2012 | -7.33 (-18.16, 4.93) |
|                 | F | Europe        | Lithuania                            | 1998 - 2006 | -12.85 (-25.64, 2.14)  | 2006 - 2012 | 31.64 (5.18, 64.75)    |             | —                    |
| Stomach         | B | Africa        | Uganda                               | 1998 - 2002 | 62.32 (-27.35, 262.66) | 2002 - 2012 | -13.41 (-22.59, -3.15) |             | —                    |
|                 | B | Asia          | China                                | 1998 - 2000 | -15.69 (-32.47, 5.27)  | 2000 - 2012 | -1.22 (-2.79, 0.38)    |             | —                    |
|                 | B | Europe        | Lithuania                            | 1998 - 2009 | -3.78 (-7.40, -0.02)   | 2009 - 2012 | 29.93 (-0.37, 69.46)   |             | —                    |
|                 | F | South America | Ecuador                              | 1998 - 2000 | -26.93 (-57.24, 24.86) | 2000 - 2012 | 6.32 (3.09, 9.65)      |             | —                    |
|                 | F | North America | USA-White                            | 1998 - 2007 | 4.29 (2.93, 5.67)      | 2007 - 2012 | -0.08 (-3.10, 3.04)    |             | —                    |
|                 | F | Asia          | China                                | 1998 - 2001 | -15.64 (-27.32, -2.09) | 2001 - 2012 | 0.49 (-2.01, 3.05)     |             | —                    |
|                 | F | Asia          | Israel                               | 1998 - 2007 | 5.56 (-0.39, 11.86)    | 2007 - 2012 | -18.10 (-29.09, -5.40) |             | —                    |
| Testis          | M | South America | Chile                                | 1998 - 2001 | 45.06 (-16.11, 150.83) | 2001 - 2012 | -1.82 (-6.75, 3.37)    |             | —                    |
|                 | M | Europe        | Spain                                | 1998 - 2002 | 14.26 (5.34, 23.94)    | 2002 - 2012 | 0.83 (-0.84, 2.52)     |             | —                    |
| Thyroid         | B | North America | USA-White                            | 1998 - 2009 | 5.74 (5.22, 6.26)      | 2009 - 2012 | 3.06 (-0.03, 6.24)     |             | —                    |
|                 | B | Asia          | China                                | 1998 - 2001 | -5.06 (-16.47, 7.91)   | 2001 - 2010 | 12.74 (10.09, 15.46)   | 2010 - 2012 | 26.58 (9.89, 45.81)  |
|                 | B | Asia          | Japan                                | 1998 - 2003 | -3.32 (-9.41, 3.18)    | 2003 - 2006 | 24.22 (-3.33, 59.61)   | 2006 - 2012 | 4.82 (1.20, 8.57)    |
|                 | B | Asia          | Philippines                          | 1998 - 2006 | 2.59 (0.06, 5.17)      | 2006 - 2012 | -7.25 (-10.83, -3.53)  |             | —                    |
|                 | B | Asia          | Republic of Korea                    | 1998 - 2010 | 23.04 (20.81, 25.31)   | 2010 - 2012 | 9.35 (-6.06, 27.30)    |             | —                    |
|                 | B | Asia          | Turkey                               | 1998 - 2002 | -0.17 (-15.14, 17.45)  | 2002 - 2005 | 41.22 (-6.77, 113.90)  | 2005 - 2012 | 8.11 (4.64, 11.69)   |
|                 | B | Europe        | Belarus                              | 1998 - 2000 | 17.01 (-9.86, 51.91)   | 2000 - 2012 | 0.64 (-0.71, 2.01)     |             | —                    |
|                 | B | Europe        | Lithuania                            | 1998 - 2002 | 33.03 (8.69, 62.81)    | 2002 - 2012 | 3.02 (-0.56, 6.73)     |             | —                    |
|                 | B | Europe        | Slovenia                             | 1998 - 2005 | 13.73 (7.22, 20.64)    | 2005 - 2012 | 0.23 (-4.43, 5.13)     |             | —                    |
|                 | M | South America | Brazil                               | 1998 - 2010 | -1.26 (-6.95, 4.77)    | 2010 - 2012 | 56.80 (-22.29, 216.38) |             | —                    |
|                 | M | Asia          | China                                | 1998 - 2001 | -7.83 (-29.68, 20.80)  | 2001 - 2010 | 17.25 (11.76, 23.01)   | 2010 - 2012 | 38.36 (8.55, 76.36)  |

|   |               |                          |             |                       |             |                       |             |                    |
|---|---------------|--------------------------|-------------|-----------------------|-------------|-----------------------|-------------|--------------------|
| M | Europe        | Belarus                  | 1998 - 2000 | 27.70 (-6.90, 75.14)  | 2000 - 2004 | -8.02 (-19.96, 5.70)  | 2004 - 2012 | 1.21 (-2.01, 4.54) |
| M | Europe        | France                   | 1998 - 2009 | 4.21 (1.84, 6.63)     | 2009 - 2012 | -12.66 (-27.21, 4.80) |             | —                  |
| M | Europe        | Norway                   | 1998 - 2006 | -3.41 (-8.87, 2.37)   | 2006 - 2012 | 14.69 (6.87, 23.07)   |             | —                  |
| F | North America | Canada                   | 1998 - 2002 | 13.23 (7.99, 18.72)   | 2002 - 2012 | 3.12 (2.20, 4.04)     |             | —                  |
| F | North America | United States of America | 1998 - 2009 | 5.62 (5.10, 6.14)     | 2009 - 2012 | 2.88 (-0.10, 5.95)    |             | —                  |
| F | North America | USA-White                | 1998 - 2009 | 5.79 (5.23, 6.36)     | 2009 - 2012 | 2.63 (-0.62, 5.98)    |             | —                  |
| F | Asia          | China                    | 1998 - 2003 | 0.56 (-5.32, 6.81)    | 2003 - 2012 | 14.04 (12.02, 16.09)  |             | —                  |
| F | Asia          | Japan                    | 1998 - 2003 | -4.96 (-12.61, 3.36)  | 2003 - 2006 | 24.86 (-11.91, 76.96) | 2006 - 2012 | 6.20 (1.38, 11.25) |
| F | Asia          | Philippines              | 1998 - 2006 | 2.55 (-0.31, 5.50)    | 2006 - 2012 | -7.81 (-11.88, -3.55) |             | —                  |
| F | Asia          | Republic of Korea        | 1998 - 2010 | 22.19 (20.05, 24.37)  | 2010 - 2012 | 7.50 (-7.58, 25.03)   |             | —                  |
| F | Asia          | Turkey                   | 1998 - 2002 | -0.11 (-15.38, 17.92) | 2002 - 2005 | 41.29 (-7.92, 116.81) | 2005 - 2012 | 7.51 (3.98, 11.15) |
| F | Europe        | Italy                    | 1998 - 2002 | 18.16 (4.57, 33.50)   | 2002 - 2012 | 4.00 (1.61, 6.45)     |             | —                  |
| F | Europe        | Lithuania                | 1998 - 2002 | 33.33 (11.35, 59.67)  | 2002 - 2012 | 2.39 (-0.79, 5.68)    |             | —                  |
| F | Europe        | Slovenia                 | 1998 - 2005 | 15.68 (5.74, 26.56)   | 2005 - 2012 | -0.94 (-8.05, 6.70)   |             | —                  |

†An em-dash (—) denotes only two joinpoints.

Supplementary Table 7: Average annual percentage change (AAPC) for cancer occurring among 15-39 year olds during the period of 1998-2012 for each country, by sex group, for cancers of the anus and rectum.<sup>†</sup>

| Country                                  | Sex: Combined         |                     | Sex: Males            |                      | Sex: Females         |                      |
|------------------------------------------|-----------------------|---------------------|-----------------------|----------------------|----------------------|----------------------|
|                                          | Anus                  | Rectum              | Anus                  | Rectum               | Anus                 | Rectum               |
| <b>Africa</b>                            |                       |                     |                       |                      |                      |                      |
| Uganda*                                  | 3.43 (0.17, 6.79)     | 1.25 (-5.26, 8.19)  | —                     | -2.24 (-8.88, 4.88)  | 2.75 (-0.28, 5.87)   | -0.04 (-8.91, 9.70)  |
| <b>South America</b>                     |                       |                     |                       |                      |                      |                      |
| Brazil*                                  | -3.96 (-11.92, 4.73)  | -0.43 (-6.12, 5.62) | —                     | -1.82 (-9.51, 6.52)  | —                    | 0.38 (-5.99, 7.17)   |
| Chile*                                   | —                     | -3.18 (-7.12, 0.93) | —                     | -2.09 (-4.78, 0.68)  | —                    | -0.19 (-5.66, 5.59)  |
| Colombia*                                | -0.10 (-6.94, 7.23)   | 2.05 (-2.04, 6.30)  | 0.99 (-6.05, 8.56)    | -1.85 (-7.28, 3.89)  | 6.09 (-2.14, 15.00)  | 6.88 (0.08, 14.14)   |
| Ecuador*                                 | 3.27 (-2.77, 9.67)    | -1.42 (-6.46, 3.89) | —                     | -2.38 (-7.43, 2.94)  | -2.71 (-4.35, -1.03) | -3.17 (-9.31, 3.39)  |
| <b>North America</b>                     |                       |                     |                       |                      |                      |                      |
| Canada*                                  | -0.40 (-3.75, 3.07)   | 4.97 (3.26, 6.70)   | -2.05 (-7.45, 3.66)   | 4.47 (1.93, 7.06)    | 0.47 (-3.47, 4.57)   | 5.49 (3.88, 7.12)    |
| USA_NPCR*                                | -2.01 (-3.02, -0.99)  | 2.57 (2.16, 2.97)   | -2.72 (-3.97, -1.45)  | 2.33 (1.85, 2.82)    | -1.11 (-2.63, 0.44)  | 2.82 (2.34, 3.32)    |
| USA_NPCR-American-Indian-Alaskan-Native* | -3.45 (-8.11, 1.44)   | 2.10 (-1.35, 5.68)  | -2.14 (-4.06, -0.18)  | 5.53 (-2.19, 13.86)  | -3.47 (-10.28, 3.84) | -1.15 (-5.81, 3.74)  |
| USA_NPCR-Asian-Pacific-Islander*         | -1.87 (-6.89, 3.41)   | -0.27 (-1.72, 1.21) | -4.33 (-9.87, 1.54)   | -0.64 (-2.72, 1.48)  | 0.05 (-6.26, 6.78)   | 0.42 (-1.65, 2.53)   |
| USA_NPCR-Black*                          | 0.75 (-1.25, 2.79)    | 2.35 (1.38, 3.34)   | 0.92 (-1.47, 3.37)    | 1.45 (-0.28, 3.22)   | 0.22 (-2.91, 3.45)   | 3.21 (2.10, 4.33)    |
| USA_NPCR-White*                          | -3.00 (-4.20, -1.79)  | 2.75 (2.29, 3.21)   | -4.48 (-6.00, -2.92)  | 2.61 (2.12, 3.10)    | -1.43 (-3.38, 0.55)  | 2.91 (2.31, 3.52)    |
| <b>Asia</b>                              |                       |                     |                       |                      |                      |                      |
| Bahrain*                                 | —                     | 2.19 (-3.55, 8.27)  | —                     | 0.55 (-5.23, 6.68)   | —                    | 4.21 (-1.40, 10.15)  |
| China*                                   | 0.52 (-6.72, 8.31)    | -0.65 (-2.75, 1.50) | 0.11 (-4.17, 4.58)    | 2.20 (-0.62, 5.10)   | 0.08 (-9.23, 10.34)  | -3.52 (-6.10, -0.86) |
| India*                                   | 1.49 (-5.28, 8.74)    | -1.88 (-4.57, 0.88) | -3.42 (-7.66, 1.02)   | -1.72 (-4.50, 1.13)  | -1.80 (-8.96, 5.92)  | -2.51 (-7.02, 2.21)  |
| Israel                                   | -3.54 (-9.48, 2.80)   | 0.08 (-2.08, 2.30)  | -1.15 (-6.94, 5.00)   | -0.24 (-3.19, 2.81)  | 0.65 (-3.71, 5.21)   | 0.46 (-2.43, 3.43)   |
| Japan*                                   | 14.82 (6.23, 24.10)   | 2.78 (0.85, 4.74)   | 13.79 (1.43, 27.65)   | 1.66 (-1.27, 4.67)   | 0.69 (-8.58, 10.89)  | 3.91 (0.90, 7.00)    |
| Kuwait*                                  | —                     | 0.33 (-5.91, 6.97)  | —                     | -2.38 (-7.39, 2.90)  | —                    | -1.59 (-10.59, 8.32) |
| Philippines*                             | -3.98 (-9.03, 1.35)   | -0.77 (-3.70, 2.26) | -1.25 (-5.90, 3.63)   | -0.56 (-3.63, 2.61)  | -1.31 (-6.71, 4.40)  | -1.10 (-4.66, 2.59)  |
| Republic of Korea*                       | 2.89 (-6.26, 12.94)   | 7.07 (5.97, 8.19)   | 1.49 (-5.92, 9.49)    | 8.14 (7.05, 9.25)    | 0.29 (-11.12, 13.16) | 5.67 (4.21, 7.14)    |
| Thailand*                                | -4.27 (-7.59, -0.82)  | 3.22 (-0.06, 6.61)  | -2.71 (-6.90, 1.68)   | 3.24 (-2.44, 9.25)   | —                    | 4.32 (-0.33, 9.20)   |
| Turkey*                                  | -0.79 (-6.98, 5.82)   | 0.88 (-2.23, 4.10)  | -2.95 (-4.74, -1.13)  | 1.99 (-4.24, 8.62)   | -4.09 (-10.35, 2.61) | -0.19 (-5.80, 5.76)  |
| <b>Europe</b>                            |                       |                     |                       |                      |                      |                      |
| Austria                                  | -5.83 (-13.53, 2.55)  | 0.63 (-1.79, 3.10)  | -3.44 (-8.89, 2.33)   | -0.31 (-3.02, 2.48)  | -0.94 (-7.86, 6.49)  | 1.12 (-3.91, 6.42)   |
| Bulgaria                                 | -2.83 (-9.32, 4.12)   | -0.21 (-2.17, 1.80) | -5.16 (-9.40, -0.71)  | -0.46 (-3.51, 2.68)  | 2.50 (-3.18, 8.51)   | -0.35 (-4.09, 3.53)  |
| Croatia                                  | 3.13 (-5.99, 13.12)   | 0.40 (-2.46, 3.34)  | 0.03 (-8.59, 9.47)    | -1.08 (-4.40, 2.36)  | —                    | 1.69 (-1.84, 5.34)   |
| Cyprus                                   | —                     | -1.28 (-8.30, 6.27) | —                     | -0.99 (-8.06, 6.62)  | —                    | 4.79 (-0.50, 10.36)  |
| Czech Republic                           | 0.22 (-5.97, 6.82)    | -0.70 (-1.98, 0.60) | -3.32 (-7.19, 0.71)   | 0.61 (-2.31, 3.61)   | 4.11 (-1.57, 10.13)  | -1.73 (-3.79, 0.38)  |
| Denmark                                  | -2.77 (-9.69, 4.67)   | 2.03 (-2.12, 6.35)  | -0.40 (-5.86, 5.38)   | 2.38 (-3.18, 8.27)   | -4.30 (-11.80, 3.83) | 1.11 (-4.23, 6.75)   |
| Estonia                                  | —                     | -0.83 (-8.12, 7.04) | —                     | -0.82 (-8.39, 7.38)  | —                    | -3.16 (-10.23, 4.47) |
| France*                                  | 4.28 (-3.04, 12.15)   | 0.38 (-1.82, 2.63)  | 2.19 (-5.89, 10.96)   | -3.37 (-6.03, -0.64) | 5.09 (-3.36, 14.28)  | 5.43 (1.34, 9.69)    |
| Germany*                                 | 0.47 (-5.50, 6.81)    | 1.73 (-1.73, 5.32)  | -0.08 (-7.22, 7.60)   | 2.29 (-3.03, 7.90)   | 6.72 (-0.68, 14.67)  | -1.24 (-8.64, 6.75)  |
| Iceland                                  | —                     | -0.92 (-7.29, 5.89) | —                     | 1.05 (-2.02, 4.22)   | —                    | -5.37 (-11.48, 1.16) |
| Ireland                                  | 4.59 (-1.98, 11.59)   | 2.74 (-0.22, 5.80)  | -5.77 (-10.71, -0.56) | 2.70 (-2.34, 7.99)   | 4.14 (-1.34, 9.93)   | 2.49 (-3.08, 8.38)   |
| Italy*                                   | -2.24 (-6.64, 2.36)   | -1.04 (-5.52, 3.65) | -2.07 (-2.72, -1.41)  | 0.98 (-4.80, 7.12)   | -3.24 (-6.24, -0.15) | -2.30 (-9.15, 5.06)  |
| Lithuania                                | -10.40 (-23.33, 4.70) | 3.05 (-1.31, 7.60)  | —                     | 3.65 (0.11, 7.31)    | —                    | 2.51 (-6.37, 12.23)  |
| Malta                                    | —                     | 7.72 (3.51, 12.11)  | 0.24 (-5.61, 6.46)    | 3.53 (1.37, 5.74)    | —                    | 7.31 (4.73, 9.95)    |
| Netherlands                              | 4.27 (-2.36, 11.36)   | 3.01 (1.75, 4.29)   | —                     | —                    | 3.59 (-2.44, 10.00)  | 2.33 (-0.59, 5.32)   |
| Norway                                   | -2.09 (-8.33, 4.59)   | 6.05 (3.51, 8.66)   | -2.83 (-8.64, 3.36)   | 7.28 (3.19, 11.54)   | -1.28 (-7.08, 4.89)  | 5.55 (0.95, 10.36)   |
| Poland*                                  | —                     | -4.25 (-8.41, 0.10) | —                     | -5.17 (-10.99, 1.04) | —                    | -0.51 (-7.59, 7.10)  |
| Slovenia                                 | —                     | 2.38 (-2.97, 8.03)  | —                     | 2.86 (-2.28, 8.27)   | —                    | 1.21 (-7.12, 10.28)  |
| Spain*                                   | -7.78 (-14.40, -0.64) | 0.75 (-2.77, 4.41)  | -5.77 (-11.78, 0.66)  | 2.27 (-4.72, 9.77)   | -0.98 (-5.32, 3.56)  | -0.11 (-3.61, 3.51)  |
| Switzerland*                             | -2.19 (-8.97, 5.10)   | -1.71 (-5.45, 2.19) | -2.37 (-6.68, 2.13)   | 0.11 (-8.42, 9.42)   | 8.25 (2.22, 14.65)   | -0.21 (-9.58, 10.12) |
| United Kingdom*                          | 1.99 (-1.01, 5.07)    | 4.34 (3.05, 5.66)   | 2.85 (-0.82, 6.65)    | 4.79 (3.25, 6.36)    | 1.77 (-1.91, 5.59)   | 3.76 (1.76, 5.80)    |
| <b>Oceania</b>                           |                       |                     |                       |                      |                      |                      |
| Australia                                | 0.75 (-3.39, 5.06)    | 4.07 (3.13, 5.01)   | -1.28 (-5.80, 3.46)   | 4.02 (2.58, 5.49)    | -0.33 (-4.58, 4.11)  | 4.23 (2.80, 5.69)    |
| New Zealand                              | -1.43 (-7.66, 5.21)   | 4.76 (1.56, 8.07)   | 0.80 (0.18, 1.41)     | 8.21 (4.32, 12.25)   | -3.08 (-10.76, 5.27) | 2.21 (-1.25, 5.80)   |

\*Sub-National

†An em-dash (—) denotes that too few cancer cases were observed to calculate the AAPC

Supplementary Table 8: Annual average percentage change (AAPC) for cancers occurring among 15-39 year old males during the period of 1998-2012 for each country, for cancers of the bladder, bone, brain (central nervous system), connective and soft tissue, eye, gallbladder and extrahepatic ducts, Hodgkin lymphoma, Kaposi sarcoma, larynx, leukaemia, lip (oral cavity and pharynx), liver and intrahepatic bile ducts, lung (incl. trachea), melanoma of skin, multiple myeloma and immunoproliferative diseases, Non-Hodgkin lymphoma, oesophagus, pancreas, prostate, and stomach.<sup>†</sup>

| Country                               | Bladder               | Bone                  | Brain, central nervous system | Connective and soft tissue | Eye                   | Gallbladder and extrahepatic ducts | Hodgkin Lymphoma     |
|---------------------------------------|-----------------------|-----------------------|-------------------------------|----------------------------|-----------------------|------------------------------------|----------------------|
| <b>Africa</b>                         |                       |                       |                               |                            |                       |                                    |                      |
| Uganda*                               | -1.56 (-8.95, 6.43)   | 5.67 (-0.15, 11.83)   | 6.84 (0.71, 13.34)            | -2.89 (-10.26, 5.09)       | -1.49 (-5.77, 2.98)   | —                                  | 3.49 (-2.38, 9.72)   |
| <b>South America</b>                  |                       |                       |                               |                            |                       |                                    |                      |
| Brazil*                               | -2.17 (-7.55, 3.53)   | -1.24 (-8.40, 6.49)   | -1.94 (-7.09, 3.49)           | -5.74 (-10.64, -0.58)      | -6.40 (-13.46, 1.24)  | -2.12 (-3.97, -0.23)               | -2.75 (-9.35, 4.34)  |
| Chile*                                | -1.77 (-16.15, 15.06) | -3.28 (-9.73, 3.62)   | 6.49 (-0.97, 14.52)           | -3.61 (-9.77, 2.98)        | —                     | —                                  | 5.46 (-1.92, 13.39)  |
| Colombia*                             | -2.45 (-7.34, 2.70)   | -0.51 (-3.92, 3.03)   | 0.72 (-2.32, 3.85)            | -0.80 (-9.03, 8.18)        | 9.63 (0.38, 19.73)    | -7.60 (-11.51, -3.52)              | -1.98 (-7.65, 4.04)  |
| Ecuador*                              | -3.17 (-8.81, 2.82)   | 3.20 (-1.61, 8.24)    | 9.27 (2.93, 16.00)            | 1.33 (-2.32, 5.13)         | 0.72 (-4.02, 5.70)    | -6.63 (-15.06, 2.63)               | 2.86 (-5.30, 11.72)  |
| <b>North America</b>                  |                       |                       |                               |                            |                       |                                    |                      |
| Canada*                               | 1.08 (-0.95, 3.15)    | -0.68 (-1.99, 0.64)   | 0.74 (-0.41, 1.91)            | 1.16 (0.00, 2.33)          | -0.38 (-4.19, 3.59)   | 9.55 (3.43, 16.02)                 | -0.08 (-0.65, 0.49)  |
| United States of America*             | -1.83 (-2.30, -1.34)  | -0.55 (-1.16, 0.07)   | -0.21 (-0.47, 0.05)           | 0.19 (-0.43, 0.82)         | -1.70 (-2.98, -0.40)  | 3.67 (1.61, 5.78)                  | -0.32 (-0.57, -0.07) |
| USA-American, Indian, Alaskan Native* | -6.04 (-14.27, 2.97)  | 5.03 (1.59, 8.58)     | -0.69 (-4.59, 3.36)           | 2.43 (-5.76, 11.33)        | -2.36 (-7.97, 3.59)   | —                                  | 1.59 (-4.80, 8.40)   |
| USA-Asian-Pacific Islander*           | -1.38 (-3.93, 1.24)   | 0.64 (-2.18, 3.55)    | 0.59 (-0.32, 2.14)            | -0.35 (-3.06, 2.44)        | -5.38 (-11.13, 0.75)  | 0.38 (-7.91, 9.41)                 | 3.44 (1.47, 5.45)    |
| USA-Black*                            | -1.14 (-3.62, 1.41)   | -1.52 (-2.97, -0.05)  | -0.02 (-0.98, 0.95)           | 0.32 (-0.84, 1.50)         | -2.54 (-8.58, 3.90)   | 8.50 (4.69, 12.45)                 | 1.24 (0.44, 2.05)    |
| USA-White*                            | -1.74 (-2.32, -1.16)  | -0.37 (-1.05, 0.31)   | -0.09 (-0.38, 0.20)           | 0.27 (-0.45, 0.99)         | -1.47 (-2.64, -0.29)  | 3.04 (1.04, 5.07)                  | -0.49 (-0.74, -0.24) |
| <b>Asia</b>                           |                       |                       |                               |                            |                       |                                    |                      |
| Bahrain*                              | -3.22 (-4.61, -1.81)  | -3.04 (-9.48, 3.85)   | 0.25 (-4.78, 5.54)            | -3.40 (-9.19, 2.77)        | —                     | —                                  | -4.05 (-11.53, 4.05) |
| China*                                | -4.42 (-8.00, -0.69)  | -1.34 (-3.44, 0.82)   | 0.14 (-1.29, 1.58)            | -0.79 (-3.37, 1.87)        | -2.66 (-8.62, 3.69)   | 0.34 (-8.05, 9.49)                 | 0.72 (-3.06, 4.64)   |
| India*                                | -0.76 (-7.63, 6.61)   | 0.63 (-2.49, 3.85)    | -2.46 (-5.84, 1.05)           | 2.68 (-2.68, 8.35)         | -1.35 (-6.33, 3.90)   | 3.81 (-2.78, 10.84)                | 1.63 (-3.02, 6.51)   |
| Israel                                | -1.28 (-3.56, 1.06)   | -0.01 (-3.17, 3.24)   | 1.27 (-0.37, 2.94)            | -3.20 (-6.12, -0.18)       | 0.34 (-6.08, 7.19)    | 4.65 (-0.33, 9.87)                 | -0.80 (-1.88, 0.28)  |
| Japan*                                | 1.09 (-2.09, 4.37)    | 0.77 (-2.83, 4.50)    | 2.59 (-0.30, 5.57)            | 5.06 (1.99, 8.22)          | 5.96 (-0.74, 13.10)   | -8.14 (-14.12, -1.75)              | 6.63 (3.30, 10.07)   |
| Kuwait*                               | -8.71 (-15.10, -1.85) | -1.44 (-7.52, 5.04)   | -3.65 (-8.60, 1.56)           | -5.35 (-12.12, 1.94)       | —                     | —                                  | 8.09 (3.75, 12.61)   |
| Philippines*                          | 0.63 (-5.24, 6.86)    | -3.99 (-6.28, -1.64)  | -3.47 (-6.19, -0.67)          | -0.25 (-3.19, 2.78)        | -0.61 (-5.63, 4.68)   | 2.48 (-3.28, 8.58)                 | 4.56 (0.53, 8.74)    |
| Republic of Korea*                    | 1.76 (-0.94, 4.53)    | 0.31 (-1.69, 2.35)    | 2.13 (0.95, 3.33)             | 6.05 (4.73, 7.38)          | 6.30 (-1.470, 14.69)  | -0.69 (-4.61, 3.39)                | 11.20 (8.04, 14.45)  |
| Thailand*                             | -0.30 (-5.97, 5.72)   | -2.27 (-7.54, 3.29)   | 2.79 (-0.67, 6.38)            | -4.59 (-9.40, 0.48)        | -2.12 (-8.17, 4.33)   | 4.33 (-4.48, 13.95)                | 1.14 (-2.01, 4.38)   |
| Turkey*                               | 3.91 (0.63, 7.30)     | -0.08 (-2.99, 2.91)   | 0.53 (-1.80, 2.92)            | -0.15 (-3.64, 3.47)        | -2.38 (-20.10, 19.26) | 2.40 (-5.04, 10.43)                | 4.26 (0.23, 8.46)    |
| <b>Europe</b>                         |                       |                       |                               |                            |                       |                                    |                      |
| Austria                               | -1.93 (-6.62, 3.00)   | 0.27 (-2.86, 3.49)    | -0.69 (-2.20, 0.84)           | 1.26 (-1.24, 3.83)         | 3.95 (-2.19, 10.47)   | -0.20 (-10.11, 10.80)              | -0.38 (-1.92, 1.19)  |
| Belarus                               | 3.07 (0.04, 6.18)     | 0.05 (-2.04, 2.19)    | 1.78 (0.11, 3.49)             | -1.07 (-3.76, 1.69)        | 3.01 (-2.31, 8.61)    | 1.96 (-3.57, 7.80)                 | 0.22 (-1.39, 1.85)   |
| Bulgaria                              | 3.60 (0.06, 7.26)     | -0.09 (-4.38, 4.40)   | -0.56 (-2.87, 1.80)           | -1.68 (-4.75, 1.49)        | 2.50 (-5.33, 10.99)   | -0.65 (-5.90, 4.89)                | -1.59 (-3.58, 0.44)  |
| Croatia                               | 5.68 (0.26, 11.41)    | -5.14 (-9.36, -0.72)  | -0.99 (-3.47, 1.55)           | 8.28 (1.49, 15.52)         | 2.19 (-6.01, 11.12)   | 2.87 (-3.02, 9.11)                 | 0.08 (-3.48, 3.77)   |
| Cyprus                                | -0.31 (-6.41, 6.19)   | -6.02 (-12.34, 0.75)  | -3.71 (-9.81, 2.81)           | 3.11 (-5.75, 12.81)        | —                     | —                                  | 0.27 (-3.58, 4.28)   |
| Czech Republic                        | -0.41 (-2.81, 2.05)   | -0.38 (-2.69, 1.98)   | -1.76 (-3.66, 0.17)           | -0.12 (-3.32, 3.18)        | -2.11 (-10.23, 6.74)  | 0.41 (-6.42, 7.74)                 | 2.19 (0.71, 3.70)    |
| Denmark                               | -6.97 (-14.43, 1.14)  | -2.31 (-6.64, 2.22)   | -0.93 (-4.14, 2.39)           | 5.38 (0.91, 10.04)         | -0.23 (-7.65, 7.80)   | -1.82 (-9.16, 6.12)                | -0.22 (-3.10, 2.74)  |
| Estonia                               | -0.75 (-5.17, 3.87)   | -9.86 (-15.89, -3.39) | -2.20 (-7.20, 3.08)           | -4.33 (-11.80, 3.77)       | -0.71 (-1.76, 0.35)   | —                                  | 0.74 (-2.80, 4.41)   |
| France*                               | -2.62 (-7.97, 3.04)   | 1.86 (-0.97, 4.77)    | 0.40 (-1.28, 2.11)            | 3.15 (-2.26, 8.85)         | 0.73 (-7.25, 9.39)    | 3.64 (-5.34, 13.46)                | 3.67 (2.13, 5.23)    |
| Germany*                              | 4.49 (-0.78, 10.04)   | -1.22 (-8.06, 6.12)   | 0.81 (-3.77, 5.61)            | 3.86 (-1.13, 9.11)         | —                     | 6.22 (-1.14, 14.13)                | 1.69 (-2.42, 5.97)   |
| Iceland                               | -5.43 (-12.99, 2.80)  | -8.74 (-16.18, -0.64) | 2.14 (-3.16, 7.74)            | -2.85 (-19.50, 17.25)      | —                     | —                                  | -2.34 (-9.20, 5.04)  |
| Ireland                               | 0.83 (-2.78, 4.57)    | -1.38 (-5.18, 2.58)   | -0.66 (-2.36, 1.08)           | 0.39 (-4.71, 5.76)         | 0.51 (-6.98, 8.61)    | -2.59 (-7.44, 2.52)                | 2.24 (0.58, 3.92)    |
| Italy*                                | 2.75 (-0.45, 6.06)    | 3.74 (-1.17, 8.88)    | -0.69 (-4.20, 2.96)           | 4.84 (-1.09, 11.11)        | -2.49 (-8.36, 3.76)   | 6.70 (0.73, 13.02)                 | 1.94 (-0.72, 4.67)   |
| Lithuania                             | -3.07 (-8.00, 2.12)   | -1.81 (-7.72, 4.47)   | 0.09 (-2.49, 2.75)            | -1.94 (-6.05, 2.35)        | 3.80 (-4.62, 12.97)   | 2.64 (1.59, 3.71)                  | -1.53 (-4.68, 1.72)  |
| Malta                                 | -5.58 (-11.90, 1.19)  | -1.21 (-7.10, 5.06)   | -1.23 (-7.90, 5.93)           | -5.12 (-10.79, 0.91)       | —                     | —                                  | -1.82 (-7.09, 3.76)  |
| Netherlands                           | 1.93 (0.19, 3.71)     | 1.83 (-0.03, 3.71)    | 0.33 (-0.90, 1.57)            | -0.41 (-2.33, 1.55)        | -2.23 (-6.70, 2.46)   | 0.72 (-4.80, 6.55)                 | -0.21 (-1.19, 0.78)  |
| Norway                                | 2.13 (-2.14, 6.59)    | 3.91 (-1.16, 9.24)    | 0.48 (-1.54, 2.55)            | 1.54 (-3.03, 6.33)         | -1.10 (-10.08, 8.78)  | 0.95 (-3.83, 5.95)                 | 1.58 (-0.49, 3.70)   |
| Poland*                               | -1.77 (-8.45, 5.39)   | 4.73 (-3.38, 13.51)   | -2.13 (-5.25, 1.09)           | -2.08 (-10.03, 6.57)       | —                     | -0.41 (-1.77, 0.96)                | -1.14 (-5.46, 3.38)  |
| Slovenia                              | 2.66 (-5.97, 12.09)   | -6.70 (-13.08, 0.14)  | 1.05 (-3.20, 5.48)            | -6.23 (-9.89, -2.42)       | 5.62 (1.23, 10.20)    | -0.30 (-0.62, 0.02)                | 0.61 (-3.28, 4.66)   |
| Spain*                                | -2.80 (-6.47, 1.02)   | 2.72 (-0.35, 5.89)    | -1.87 (-4.11, 0.42)           | -1.40 (-5.42, 2.80)        | -0.27 (-4.79, 4.47)   | -0.01 (-8.34, 9.07)                | -0.08 (-1.97, 1.85)  |
| Switzerland*                          | 6.70 (2.09, 11.53)    | -0.14 (-5.57, 5.61)   | 1.84 (-1.33, 5.12)            | 0.54 (-5.96, 7.48)         | -1.59 (-5.88, 2.90)   | 0.70 (-3.94, 5.56)                 | 2.27 (-0.95, 5.59)   |
| United Kingdom*                       | -5.72 (-7.62, -3.79)  | 1.12 (0.07, 2.19)     | 0.45 (-0.20, 1.12)            | 0.24 (-1.14, 1.64)         | -0.10 (-3.69, 3.63)   | 3.36 (-1.28, 8.22)                 | 0.83 (0.00, 1.66)    |
| <b>Oceania</b>                        |                       |                       |                               |                            |                       |                                    |                      |
| Australia                             | -5.13 (-8.69, -1.43)  | 1.27 (0.34, 2.20)     | 0.48 (-0.69, 1.65)            | -0.73 (-2.72, 1.30)        | -4.33 (-7.69, -0.84)  | -3.59 (-9.11, 2.27)                | 1.19 (0.24, 2.15)    |
| New Zealand                           | -9.68 (-15.02, -4.00) | -1.42 (-5.60, 2.95)   | 0.94 (-0.98, 2.91)            | -0.23 (-3.93, 3.60)        | -9.59 (-14.81, -4.04) | 4.37 (0.64, 8.25)                  | 1.15 (-2.06, 4.46)   |

| Country                               | Kaposi sarcoma         | Larynx                 | Leukaemia             | Lip, oral cavity and pharynx | Liver and intrahepatic bile ducts | Lung (incl. trachea)  | Melanoma of skin      |
|---------------------------------------|------------------------|------------------------|-----------------------|------------------------------|-----------------------------------|-----------------------|-----------------------|
| <b>Africa</b>                         |                        |                        |                       |                              |                                   |                       |                       |
| Uganda*                               | -1.65 (-3.42, 0.15)    | -3.64 (-12.41, 6.00)   | 12.31 (3.02, 22.43)   | 1.72 (-2.80, 6.44)           | 8.38 (2.98, 14.07)                | -3.32 (-9.75, 3.57)   | —                     |
| <b>South America</b>                  |                        |                        |                       |                              |                                   |                       |                       |
| Brazil*                               | -0.19 (-8.72, 9.15)    | -1.03 (-6.60, 4.88)    | -9.06 (-14.89, -2.83) | -0.18 (-5.66, 5.63)          | -0.09 (-3.60, 3.55)               | 1.53 (-8.76, 12.97)   | 0.29 (-7.54, 8.78)    |
| Chile*                                | —                      | —                      | -1.14 (-7.76, 5.96)   | —                            | —                                 | —                     | 0.59 (-2.05, 3.31)    |
| Colombia*                             | -6.36 (-10.09, -2.47)  | -3.23 (-8.36, 2.18)    | 0.50 (-3.00, 4.12)    | 0.60 (-7.16, 9.00)           | 1.32 (-4.67, 7.70)                | 2.84 (-3.64, 9.75)    | -3.35 (-10.31, 4.16)  |
| Ecuador*                              | 5.61 (-1.87, 13.66)    | —                      | 2.27 (0.02, 4.57)     | 7.31 (0.97, 14.06)           | -3.96 (-8.14, 0.42)               | 3.66 (-6.06, 14.39)   | -8.26 (-14.44, -1.63) |
| <b>North America</b>                  |                        |                        |                       |                              |                                   |                       |                       |
| Canada*                               | -6.17 (-8.69, -3.58)   | -5.30 (-10.65, 0.37)   | 0.81 (-0.13, 1.77)    | 0.26 (-1.06, 1.59)           | -1.64 (-4.14, 0.92)               | -2.63 (-4.68, -0.54)  | -0.88 (-1.67, -0.10)  |
| United States of America*             | -3.90 (-4.44, -3.35)   | -3.04 (-4.53, -1.54)   | 1.17 (0.92, 1.42)     | 0.32 (-0.18, 0.82)           | 0.58 (-0.51, 1.68)                | -2.87 (-3.35, -2.40)  | -0.87 (-1.75, 0.02)   |
| USA-American, Indian, Alaskan Native* | -5.60 (-14.81, 4.60)   | —                      | -1.42 (-4.03, 1.26)   | -4.06 (-10.30, 2.62)         | -4.33 (-10.48, 2.24)              | -3.60 (-10.63, 4.00)  | -0.57 (-7.19, 6.53)   |
| USA-Asian-Pacific Islander*           | -2.29 (-6.73, 2.37)    | 0.71 (-5.67, 7.52)     | 0.55 (-1.00, 2.12)    | 0.16 (-1.04, 1.37)           | -3.98 (-4.99, -2.95)              | -1.31 (-3.14, 0.56)   | 0.67 (-4.80, 6.45)    |
| USA-Black*                            | -2.14 (-3.12, -1.14)   | -2.73 (-6.46, 1.15)    | 1.16 (0.33, 1.99)     | -0.11 (-1.53, 1.33)          | 0.76 (-1.26, 2.82)                | -4.55 (-6.38, -2.68)  | -4.27 (-7.65, -0.76)  |
| USA-White*                            | -5.52 (-6.36, -4.66)   | -2.88 (-4.40, -1.33)   | 1.26 (0.97, 1.56)     | 0.27 (-0.27, 0.81)           | 1.12 (-0.29, 2.56)                | -2.63 (-3.22, -2.03)  | -0.59 (-1.46, 0.30)   |
| <b>Asia</b>                           |                        |                        |                       |                              |                                   |                       |                       |
| Bahrain*                              | —                      | —                      | -0.53 (-6.34, 5.63)   | 2.56 (-2.75, 8.16)           | -1.95 (-5.40, 1.62)               | -3.75 (-5.22, -2.25)  | —                     |
| China*                                | —                      | -7.55 (-10.63, -4.36)  | -0.53 (-1.77, 0.72)   | -1.60 (-2.08, -1.12)         | -2.73 (-3.46, -2.00)              | -2.08 (-3.62, -0.52)  | -5.87 (-11.61, 0.24)  |
| India*                                | —                      | -4.46 (-11.14, 2.73)   | 0.51 (-1.65, 2.73)    | 6.78 (4.18, 9.44)            | 0.42 (-4.49, 5.58)                | -1.17 (-5.36, 3.21)   | 8.17 (-3.05, 20.70)   |
| Israel                                | -2.30 (-9.21, 5.13)    | 2.24 (-4.10, 9.00)     | -2.12 (-3.74, -0.47)  | -1.87 (-5.53, 1.93)          | 0.16 (-8.01, 9.04)                | -4.21 (-8.37, 0.14)   | -2.61 (-3.84, -1.35)  |
| Japan*                                | 4.00 (-38.82, 76.80)   | -3.02 (-9.18, 3.56)    | 1.72 (0.06, 3.41)     | 3.80 (1.32, 6.35)            | -3.17 (-5.15, -1.15)              | 0.98 (-0.78, 2.76)    | 0.28 (-7.41, 8.62)    |
| Kuwait*                               | —                      | —                      | 4.06 (-2.73, 11.32)   | -3.10 (-11.12, 5.63)         | -7.47 (-13.82, -0.64)             | -2.06 (-7.69, 3.92)   | —                     |
| Philippines*                          | -3.97 (-5.19, -2.73)   | -1.08 (-6.77, 4.97)    | -0.68 (-2.76, 1.45)   | -2.78 (-5.30, -0.19)         | -7.17 (-8.62, -5.70)              | -0.53 (-3.27, 2.29)   | 1.24 (-3.49, 6.21)    |
| Republic of Korea*                    | 11.38 (2.90, 20.55)    | -1.40 (-9.29, 7.17)    | 1.16 (-0.27, 2.61)    | 2.95 (0.89, 5.05)            | -3.67 (-4.76, -2.56)              | -2.71 (-4.52, -0.86)  | 2.40 (-2.87, 7.95)    |
| Thailand*                             | 8.52 (0.93, 16.67)     | -3.17 (-9.07, 3.12)    | 2.23 (-0.34, 4.86)    | 3.08 (-0.24, 6.51)           | 0.52 (-0.54, 1.59)                | 0.84 (-2.11, 3.89)    | -1.89 (-11.16, 8.35)  |
| Turkey*                               | 3.10 (-4.55, 11.37)    | -8.95 (-16.19, -1.08)  | 2.01 (0.45, 3.61)     | 0.95 (-2.56, 4.57)           | -2.47 (-8.97, 4.49)               | -6.09 (-7.94, -4.21)  | 6.38 (1.73, 11.24)    |
| <b>Europe</b>                         |                        |                        |                       |                              |                                   |                       |                       |
| Austria                               | —                      | -10.92 (-16.24, -5.27) | 0.49 (-1.55, 2.57)    | -1.94 (-5.31, 1.55)          | 2.00 (-4.84, 9.34)                | -1.16 (-2.84, 0.56)   | 3.30 (1.07, 5.57)     |
| Belarus                               | —                      | -2.57 (-7.86, 3.03)    | -3.56 (-5.22, -1.88)  | 0.91 (-1.72, 3.61)           | 0.97 (-4.87, 7.16)                | -2.47 (-4.68, -0.21)  | 3.83 (0.72, 7.05)     |
| Bulgaria                              | —                      | -11.56 (-15.87, -7.03) | -0.13 (-2.45, 2.24)   | 0.65 (-1.05, 2.38)           | -0.29 (-4.33, 3.93)               | -4.48 (-6.89, -2.00)  | 1.49 (-2.37, 5.49)    |
| Croatia                               | —                      | -8.00 (-13.05, -2.66)  | -4.42 (-8.18, -0.50)  | -3.33 (-6.62, 0.08)          | -3.78 (-9.11, 1.87)               | -8.40 (-11.46, -5.23) | 3.51 (0.59, 6.52)     |
| Cyprus                                | -7.65 (-9.90, -5.33)   | —                      | -0.28 (-4.35, 3.95)   | 1.38 (-6.20, 9.58)           | -4.80 (-10.69, 1.48)              | 7.16 (1.42, 13.22)    | 7.33 (1.43, 13.57)    |
| Czech Republic                        | 1.17 (-6.24, 9.17)     | -0.72 (-7.23, 6.25)    | 3.37 (0.54, 6.27)     | -2.10 (-6.01, 1.97)          | -1.69 (-6.37, 3.22)               | -7.56 (-10.37, -4.65) | 2.39 (1.30, 3.50)     |
| Denmark                               | -7.84 (-14.75, -0.38)  | 1.36 (-3.66, 6.65)     | 0.62 (-1.57, 2.87)    | -1.08 (-5.54, 3.58)          | 2.11 (-6.11, 11.05)               | 0.42 (-3.82, 4.85)    | 7.79 (5.40, 10.23)    |
| Estonia                               | —                      | -4.50 (-14.31, 6.44)   | 0.79 (-7.80, 10.20)   | 3.21 (-2.86, 9.65)           | -2.37 (-9.02, 4.76)               | -5.74 (-11.05, -0.12) | 6.64 (0.46, 13.21)    |
| France*                               | -12.66 (-17.80, -7.19) | -8.57 (-13.78, -3.04)  | -1.29 (-2.80, 0.24)   | -4.90 (-7.05, -2.70)         | 1.08 (-6.28, 9.01)                | 0.02 (-1.52, 1.58)    | 3.95 (2.08, 5.86)     |
| Germany*                              | 1.25 (-5.66, 8.66)     | -5.40 (-12.68, 2.48)   | -0.92 (-4.78, 3.09)   | -2.53 (-7.95, 3.20)          | 3.41 (-5.26, 12.87)               | -1.43 (-6.73, 4.17)   | -2.19 (-4.41, 0.07)   |
| Iceland                               | —                      | —                      | -1.69 (-8.08, 5.15)   | 3.03 (-3.65, 10.18)          | —                                 | 2.00 (-2.48, 6.69)    | -5.19 (-13.60, 4.04)  |
| Ireland                               | 4.62 (-1.85, 11.52)    | -4.53 (-11.78, 3.32)   | -1.92 (-4.53, 0.76)   | 2.45 (-1.30, 6.33)           | 7.94 (0.42, 16.02)                | 2.15 (-4.09, 8.80)    | 0.87 (-0.75, 2.52)    |
| Italy*                                | -0.96 (-7.53, 6.09)    | -3.12 (-9.95, 4.22)    | -0.17 (-3.03, 2.78)   | 5.12 (1.30, 9.08)            | 4.70 (-1.56, 11.37)               | -1.09 (-4.70, 2.66)   | 2.91 (1.19, 4.66)     |
| Lithuania                             | —                      | 2.04 (-5.35, 10.00)    | -0.68 (-4.39, 3.18)   | -0.10 (-5.13, 5.20)          | 3.70 (-1.91, 9.64)                | -2.83 (-7.63, 2.21)   | 2.32 (-0.18, 4.89)    |
| Malta                                 | 1.43 (-1.19, 4.11)     | —                      | -1.07 (-8.87, 7.38)   | -4.76 (-9.66, 0.40)          | —                                 | -4.14 (-13.49, 6.21)  | 6.83 (1.26, 12.70)    |
| Netherlands                           | —                      | -8.57 (-14.25, -2.50)  | 0.96 (-0.34, 2.27)    | 1.05 (-1.28, 3.43)           | 2.62 (-0.15, 5.46)                | 0.94 (-0.78, 2.69)    | 2.48 (1.89, 3.09)     |
| Norway                                | 9.47 (0.73, 18.97)     | -0.97 (-5.33, 3.60)    | 0.85 (-2.38, 4.18)    | 0.46 (-4.34, 5.51)           | 1.01 (-5.36, 7.81)                | 0.85 (-2.33, 4.13)    | -0.16 (-1.93, 1.64)   |
| Poland*                               | —                      | -5.19 (-11.12, 1.14)   | 1.55 (-3.52, 6.90)    | 0.83 (-6.96, 9.27)           | 1.81 (-9.95, 15.09)               | -5.60 (-12.47, 1.82)  | 0.72 (-3.14, 4.74)    |
| Slovenia                              | —                      | -9.91 (-15.20, -4.30)  | -1.21 (-5.57, 3.37)   | -1.69 (-7.21, 4.16)          | -3.16 (-20.36, 17.74)             | -7.79 (-13.74, -1.44) | 4.07 (1.40, 6.81)     |
| Spain*                                | -3.78 (-9.20, 1.97)    | -8.89 (-15.07, -2.26)  | 0.74 (-2.66, 4.26)    | -5.17 (-8.01, -2.25)         | 4.74 (-5.72, 16.37)               | -7.28 (-11.67, -2.67) | 3.10 (0.04, 6.25)     |
| Switzerland*                          | -1.59 (-8.95, 6.37)    | -3.75 (-7.98, 0.68)    | 0.80 (-2.63, 4.34)    | 2.93 (0.10, 5.85)            | -0.75 (-6.77, 5.66)               | 1.50 (-5.49, 9.01)    | -0.65 (-2.92, 1.67)   |
| United Kingdom*                       | 1.75 (-0.53, 4.09)     | 0.33 (-2.86, 3.63)     | 0.48 (-0.46, 1.43)    | 2.60 (1.77, 3.44)            | 1.69 (-1.74, 5.25)                | 1.00 (-0.52, 2.54)    | 2.39 (1.52, 3.26)     |
| <b>Oceania</b>                        |                        |                        |                       |                              |                                   |                       |                       |
| Australia                             | -6.16 (-9.44, -2.76)   | -2.52 (-9.73, 5.28)    | 0.01 (-1.02, 1.05)    | -2.08 (-3.23, -0.91)         | 1.00 (-2.07, 4.16)                | -0.39 (-1.74, 0.99)   | -2.78 (-3.52, -2.04)  |
| New Zealand                           | 1.02 (-7.30, 10.08)    | 9.34 (0.19, 19.33)     | -0.62 (-3.00, 1.82)   | 1.26 (-0.89, 3.45)           | -0.91 (-8.37, 7.16)               | 0.43 (-3.28, 4.28)    | -2.66 (-4.11, -1.19)  |

| Country                               | Multiple myeloma and immunoproliferative diseases | Non-Hodgkin lymphoma | Oesophagus            | Pancreas             | Prostate              | Stomach               |
|---------------------------------------|---------------------------------------------------|----------------------|-----------------------|----------------------|-----------------------|-----------------------|
| <b>Africa</b>                         |                                                   |                      |                       |                      |                       |                       |
| Uganda*                               | -13.35 (-19.08, -7.21)                            | 4.89 (-1.44, 11.62)  | -3.72 (-9.66, 2.62)   | 2.43 (-6.03, 11.66)  | 0.54 (-13.01, 16.19)  | -1.86 (-10.09, 7.12)  |
| <b>South America</b>                  |                                                   |                      |                       |                      |                       |                       |
| Brazil*                               | -6.25 (-11.68, -0.48)                             | 4.14 (-1.72, 10.34)  | -7.68 (-18.06, 4.01)  | 1.52 (-3.90, 7.23)   | 0.56 (-7.12, 8.88)    | 0.10 (-8.31, 9.27)    |
| Chile*                                | —                                                 | 1.31 (-5.74, 8.89)   | -1.07 (-8.90, 7.44)   | —                    | —                     | 1.74 (-4.44, 8.31)    |
| Colombia*                             | -0.19 (-7.36, 7.55)                               | 0.42 (-3.16, 4.13)   | -5.67 (-10.42, -0.68) | -3.40 (-10.22, 3.95) | -2.90 (-12.17, 7.34)  | -2.49 (-6.00, 1.16)   |
| Ecuador*                              | -7.48 (-14.19, -0.24)                             | 1.22 (-1.98, 4.51)   | —                     | 3.65 (-7.29, 15.89)  | -1.57 (-5.32, 2.34)   | 2.05 (-3.01, 7.38)    |
| <b>North America</b>                  |                                                   |                      |                       |                      |                       |                       |
| Canada*                               | -1.81 (-5.66, 2.20)                               | -1.34 (-1.83, -0.85) | -0.21 (-4.65, 4.44)   | 4.71 (0.17, 9.45)    | 2.05 (-5.22, 9.87)    | 1.29 (-0.99, 3.62)    |
| United States of America*             | 1.44 (0.49, 2.40)                                 | -0.74 (-0.99, -0.49) | 0.26 (-1.07, 1.60)    | 1.55 (0.69, 2.42)    | 2.67 (0.40, 4.99)     | 0.40 (-0.28, 1.09)    |
| USA-American, Indian, Alaskan Native* | -4.11 (-10.86, 3.16)                              | -0.89 (-4.15, 2.49)  | -0.72 (-4.90, 3.64)   | -1.62 (-8.62, 5.91)  | —                     | 0.14 (-6.08, 6.77)    |
| USA-Asian-Pacific Islander*           | 2.74 (-3.11, 8.94)                                | -0.87 (-2.28, 0.56)  | -4.54 (-8.83, -0.04)  | 3.30 (-1.54, 8.37)   | 1.48 (-8.04, 12.00)   | -1.04 (-2.70, 0.65)   |
| USA-Black*                            | 1.20 (-1.58, 4.06)                                | -1.51 (-2.05, -0.96) | -4.20 (-7.36, -0.94)  | -0.08 (-2.55, 2.45)  | 5.72 (3.48, 8.01)     | -1.99 (-3.67, -0.27)  |
| USA-White*                            | 1.45 (0.76, 2.15)                                 | -0.60 (-0.86, -0.33) | 0.98 (-0.46, 2.45)    | 1.79 (0.66, 2.93)    | 1.59 (-0.73, 3.96)    | 0.98 (0.14, 1.82)     |
| <b>Asia</b>                           |                                                   |                      |                       |                      |                       |                       |
| Bahrain*                              | —                                                 | -0.19 (-6.76, 6.84)  | —                     | —                    | —                     | -3.68 (-5.48, -1.85)  |
| China*                                | -0.55 (-7.85, 7.32)                               | 0.79 (-0.47, 2.07)   | -2.19 (-6.11, 1.89)   | -0.29 (-4.11, 3.68)  | 2.94 (-2.48, 8.67)    | -3.23 (-4.74, -1.70)  |
| India*                                | 3.92 (-2.47, 10.74)                               | -0.68 (-3.49, 2.20)  | 4.59 (-2.18, 11.82)   | 1.78 (-4.85, 8.88)   | 2.40 (-4.60, 9.91)    | 0.11 (-1.98, 2.24)    |
| Israel*                               | 1.95 (-4.33, 8.65)                                | -0.33 (-1.67, 1.03)  | -7.76 (-13.34, -1.82) | -1.89 (-6.63, 3.10)  | -2.13 (-9.38, 5.72)   | -2.13 (-6.31, 2.24)   |
| Japan*                                | -3.27 (-9.25, 3.10)                               | 3.56 (0.13, 7.11)    | 5.53 (-1.15, 12.67)   | 0.61 (-4.48, 5.96)   | 1.80 (-4.84, 8.90)    | -4.34 (-5.87, -2.78)  |
| Kuwait*                               | -5.05 (-18.21, 10.22)                             | -2.33 (-7.77, 3.43)  | -4.02 (-5.09, -2.93)  | -3.10 (-6.81, 0.75)  | —                     | 8.30 (-5.08, 23.56)   |
| Philippines*                          | -0.80 (-10.35, 9.76)                              | -2.36 (-4.11, -0.58) | -4.97 (-11.88, 2.47)  | 0.80 (-6.17, 8.28)   | -6.89 (-12.41, -1.01) | -8.27 (-11.52, -4.90) |
| Republic of Korea*                    | 2.75 (-1.21, 6.86)                                | 3.19 (2.01, 4.39)    | -3.65 (-9.43, 2.49)   | 0.63 (-2.31, 3.66)   | 2.92 (-3.36, 9.62)    | -3.13 (-4.06, -2.20)  |
| Thailand*                             | -3.82 (-11.32, 4.31)                              | 0.21 (-2.01, 2.48)   | 5.50 (-0.21, 11.53)   | 2.91 (-4.63, 11.05)  | —                     | -2.69 (-7.26, 2.12)   |
| Turkey*                               | -6.36 (-11.96, -0.40)                             | 1.63 (-0.42, 3.72)   | -3.41 (-12.47, 6.60)  | -1.56 (-5.59, 2.65)  | -1.66 (-6.05, 2.94)   | 0.35 (-3.57, 4.43)    |
| <b>Europe</b>                         |                                                   |                      |                       |                      |                       |                       |
| Austria                               | 0.78 (-5.50, 7.47)                                | -0.37 (-2.52, 1.83)  | 3.10 (-5.67, 12.67)   | 3.13 (-1.49, 7.95)   | -1.48 (-10.23, 8.12)  | -4.95 (-8.45, -1.32)  |
| Belarus                               | 2.61 (-1.18, 6.54)                                | 2.38 (0.10, 4.71)    | 3.71 (-2.79, 10.65)   | -1.43 (-5.22, 2.50)  | 4.05 (0.54, 7.68)     | -0.16 (-2.05, 1.77)   |
| Bulgaria                              | -2.31 (-10.66, 6.82)                              | 4.17 (1.90, 6.50)    | 5.78 (0.71, 11.11)    | -4.00 (-7.20, -0.69) | 0.14 (-4.86, 5.40)    | -2.93 (-7.10, 1.43)   |
| Croatia                               | -2.72 (-10.09, 5.26)                              | 1.32 (-2.21, 4.98)   | 2.18 (-4.95, 9.84)    | -4.46 (-12.32, 4.10) | -2.93 (-16.78, 13.21) | -3.64 (-7.38, 0.24)   |
| Cyprus                                | —                                                 | 1.30 (-5.58, 8.69)   | —                     | 8.47 (6.02, 10.98)   | —                     | 3.94 (-1.00, 9.14)    |
| Czech Republic                        | 3.99 (-1.97, 10.31)                               | 2.73 (1.77, 3.70)    | 0.80 (-5.76, 7.81)    | 1.15 (-2.72, 5.17)   | 3.10 (-3.31, 9.93)    | -3.77 (-6.99, -0.43)  |
| Denmark                               | 3.00 (-3.97, 10.48)                               | 0.93 (-0.98, 2.88)   | 4.03 (-4.55, 13.37)   | 3.26 (-2.86, 9.76)   | 2.37 (-16.99, 26.23)  | -5.76 (-10.55, -0.71) |
| Estonia                               | 0.60 (-4.81, 6.33)                                | 7.58 (1.64, 13.87)   | 0.08 (-0.45, 0.61)    | -3.77 (-9.60, 2.44)  | —                     | -1.17 (-9.09, 7.44)   |
| France*                               | 3.47 (0.51, 6.52)                                 | -2.59 (-4.19, -0.97) | -1.30 (-9.22, 7.31)   | 4.85 (-0.29, 10.25)  | -0.44 (-8.64, 8.50)   | -2.01 (-5.97, 2.13)   |
| Germany*                              | 1.70 (-5.96, 9.99)                                | -1.64 (-4.87, 1.70)  | -3.62 (-9.77, 2.95)   | 9.15 (3.02, 15.65)   | 0.27 (-7.79, 9.04)    | 2.71 (-2.47, 8.17)    |
| Iceland                               | —                                                 | -6.30 (-13.52, 1.51) | —                     | —                    | —                     | -5.06 (-13.64, 4.37)  |
| Ireland                               | -2.39 (-9.30, 5.05)                               | 0.17 (-2.11, 2.50)   | -2.09 (-7.03, 3.12)   | 0.67 (-3.72, 5.26)   | 1.26 (-3.30, 6.05)    | -2.39 (-6.76, 2.18)   |
| Italy*                                | -5.49 (-13.40, 3.14)                              | -0.82 (-2.86, 1.25)  | -1.38 (-9.75, 7.76)   | 2.79 (-1.54, 7.31)   | —                     | -6.42 (-11.48, -1.08) |
| Lithuania                             | 5.51 (-2.39, 14.06)                               | 1.10 (-1.89, 4.17)   | 6.12 (-0.27, 12.92)   | -2.44 (-8.92, 4.51)  | -3.40 (-22.36, 20.21) | 0.24 (-4.35, 5.05)    |
| Malta                                 | —                                                 | 1.49 (-5.44, 8.92)   | —                     | —                    | —                     | 1.71 (-6.83, 11.03)   |
| Netherlands                           | -1.64 (-6.30, 3.25)                               | 2.48 (1.35, 3.62)    | 2.31 (-0.55, 5.26)    | 5.37 (-0.58, 11.67)  | 0.39 (-8.11, 9.67)    | -0.36 (-3.52, 2.90)   |
| Norway                                | 0.80 (-6.39, 8.55)                                | -0.78 (-2.62, 1.09)  | 1.33 (-7.02, 10.43)   | 0.13 (-6.37, 7.09)   | -4.48 (-11.47, 3.06)  | 2.63 (-2.14, 7.64)    |
| Poland*                               | -1.65 (-6.72, 3.70)                               | 6.29 (-0.32, 13.32)  | -0.44 (-3.58, 2.79)   | -2.08 (-7.33, 3.47)  | —                     | 4.07 (-3.43, 12.16)   |
| Slovenia                              | 1.61 (-3.52, 7.01)                                | -0.82 (-4.23, 2.72)  | -2.65 (-10.13, 5.45)  | -2.72 (-10.26, 5.45) | —                     | 3.69 (-4.44, 12.52)   |
| Spain*                                | 0.68 (-6.64, 8.57)                                | -3.04 (-5.37, -0.66) | -7.57 (-14.91, 0.41)  | -2.12 (-8.49, 4.70)  | 0.70 (-1.58, 3.04)    | -3.20 (-6.50, 0.21)   |
| Switzerland*                          | 1.54 (-4.31, 7.75)                                | 0.60 (-2.84, 4.16)   | 3.37 (-6.18, 13.89)   | 0.48 (-6.09, 7.52)   | -2.64 (-15.00, 11.52) | -3.05 (-9.53, 3.89)   |
| United Kingdom*                       | 4.44 (1.23, 7.76)                                 | 0.73 (0.09, 1.37)    | 0.26 (-1.58, 2.12)    | 1.15 (-1.62, 4.00)   | 2.39 (-2.28, 7.28)    | 0.03 (-1.87, 1.96)    |
| <b>Oceania</b>                        |                                                   |                      |                       |                      |                       |                       |
| Australia                             | -0.65 (-4.15, 2.99)                               | -0.25 (-1.24, 0.76)  | -0.73 (-5.93, 4.76)   | 3.91 (0.95, 6.95)    | 17.33 (12.58, 22.28)  | -1.69 (-4.03, 0.71)   |
| New Zealand                           | 1.12 (-5.49, 8.19)                                | -0.38 (-2.74, 2.03)  | 1.74 (-5.77, 9.86)    | -0.12 (-7.67, 8.06)  | -1.21 (-8.45, 6.60)   | -0.01 (-4.26, 4.43)   |

\*Sub-National

†An em-dash (—) denotes that too few cancer cases were observed to calculate the AAPC

Supplementary Table 9: Annual average percentage change (AAPC) for cancers occurring among 15-39 year old females during the period of 1998-2012 for each country, for cancers of the bladder, bone, brain (central nervous system), connective and soft tissue, corpus uteri, eye, gallbladder and extrahepatic ducts, Hodgkin lymphoma, Kaposi sarcoma, larynx, leukaemia, lip (oral cavity and pharynx), liver and intrahepatic bile ducts, and lung (incl. trachea), melanoma of skin, multiple myeloma and immunoproliferative diseases, Non-Hodgkin lymphoma, oesophagus, ovary, pancreas, and stomach.<sup>†</sup>

| Country                               | Bladder               | Bone                  | Brain, central nervous system | Connective and soft tissue | Corpus uteri         | Eye                    | Gallbladder and extrahepatic ducts |
|---------------------------------------|-----------------------|-----------------------|-------------------------------|----------------------------|----------------------|------------------------|------------------------------------|
| <b>Africa</b>                         |                       |                       |                               |                            |                      |                        |                                    |
| Uganda*                               | -0.88 (-11.82, 11.41) | 5.82 (1.16, 10.68)    | -2.45 (-9.75, 5.45)           | 1.11 (-5.62, 8.32)         | 7.68 (0.04, 15.92)   | 0.80 (-3.40, 5.18)     | —                                  |
| <b>South America</b>                  |                       |                       |                               |                            |                      |                        |                                    |
| Brazil*                               | -4.38 (-8.69, 0.14)   | 3.98 (-2.88, 11.33)   | -4.32 (-7.66, -0.87)          | -6.38 (-13.02, 0.78)       | 1.06 (-5.77, 8.38)   | 4.12 (-3.74, 12.63)    | 0.89 (-2.44, 4.33)                 |
| Chile*                                | —                     | 0.76 (-6.30, 8.34)    | -2.12 (-7.34, 3.40)           | 2.08 (-1.58, 5.88)         | 4.34 (-12.05, 23.78) | —                      | -3.02 (-8.46, 2.75)                |
| Colombia*                             | 1.82 (-2.63, 6.48)    | 0.40 (-5.16, 6.29)    | -2.73 (-6.86, 1.58)           | 2.11 (-3.26, 7.79)         | 2.52 (-3.57, 9.00)   | -1.35 (-2.43, -0.26)   | -0.74 (-6.77, 5.68)                |
| Ecuador*                              | -2.93 (-8.94, 3.49)   | -3.59 (-10.98, 4.42)  | 2.13 (-0.95, 5.31)            | -0.90 (-6.07, 4.57)        | 5.51 (-2.38, 14.04)  | -2.65 (-8.23, 3.28)    | 1.30 (-2.46, 5.21)                 |
| <b>North America</b>                  |                       |                       |                               |                            |                      |                        |                                    |
| Canada*                               | 0.42 (-2.19, 3.10)    | 1.19 (-1.15, 3.57)    | 0.58 (-0.75, 1.93)            | 0.00 (-2.10, 2.16)         | 2.69 (1.43, 3.96)    | 5.33 (0.35, 10.55)     | 6.63 (2.61, 10.82)                 |
| United States of America*             | -2.49 (-3.19, -1.78)  | -0.23 (-1.11, 0.67)   | -0.09 (-0.47, 0.28)           | 0.23 (-0.48, 0.94)         | 3.12 (2.86, 3.39)    | 0.38 (-0.97, 1.76)     | 3.00 (0.60, 5.45)                  |
| USA-American, Indian, Alaskan Native* | -6.88 (-13.95, 0.78)  | -5.35 (-11.65, 1.39)  | -1.27 (-4.91, 2.51)           | 2.09 (-2.08, 6.43)         | 3.21 (-0.06, 6.59)   | —                      | 31.59 (15.68, 49.69)               |
| USA-Asian-Pacific Islander*           | -0.88 (-5.32, 3.77)   | 2.74 (-0.30, 5.87)    | 0.49 (-1.80, 2.83)            | 1.48 (-1.26, 4.30)         | 2.89 (1.78, 4.02)    | -5.09 (-12.95, 3.48)   | -1.37 (-6.37, 3.89)                |
| USA-Black*                            | -2.89 (-5.12, -0.60)  | 0.10 (-1.70, 1.93)    | 1.56 (0.64, 2.48)             | 0.18 (-0.78, 1.15)         | 3.70 (2.32, 5.11)    | 1.26 (-5.41, 8.39)     | 0.87 (-3.04, 4.94)                 |
| USA-White*                            | -2.43 (-3.08, -1.78)  | -0.29 (-1.28, 0.72)   | -0.16 (-0.57, 0.25)           | 0.24 (-0.60, 1.09)         | 3.18 (2.86, 3.50)    | 0.56 (-0.89, 2.03)     | 3.87 (1.00, 6.83)                  |
| <b>Asia</b>                           |                       |                       |                               |                            |                      |                        |                                    |
| Bahrain*                              | —                     | -5.65 (-12.10, 1.28)  | 0.90 (-7.61, 10.20)           | 4.36 (-22.83, 41.11)       | -2.68 (-10.96, 6.36) | —                      | —                                  |
| China*                                | -6.29 (-13.03, 0.96)  | 1.49 (-1.52, 4.59)    | -1.77 (-2.90, -0.62)          | -2.34 (-5.15, 0.56)        | 4.80 (2.72, 6.92)    | 3.10 (-4.02, 10.74)    | -5.20 (-10.13, 0.00)               |
| India*                                | -0.21 (-4.04, 3.76)   | 0.10 (-6.29, 6.92)    | 0.21 (-2.29, 2.78)            | 0.67 (-5.07, 6.75)         | 2.75 (-5.52, 11.73)  | -1.47 (-9.14, 6.86)    | -0.98 (-8.62, 7.30)                |
| Israel                                | -5.51 (-11.03, 0.34)  | -3.56 (-8.10, 1.21)   | 0.44 (-1.79, 2.72)            | -2.10 (-5.95, 1.92)        | 2.93 (-1.33, 7.38)   | -1.87 (-8.68, 5.44)    | 1.91 (-4.92, 9.24)                 |
| Japan*                                | 9.30 (2.06, 17.05)    | 6.02 (-0.14, 12.56)   | 1.54 (-2.11, 5.32)            | 3.69 (1.06, 6.39)          | 9.90 (6.58, 13.32)   | —                      | -8.71 (-14.15, -2.93)              |
| Kuwait*                               | —                     | -4.81 (-11.92, 2.87)  | 1.07 (-4.75, 7.24)            | 10.05 (4.45, 15.95)        | -3.07 (-7.77, 1.87)  | —                      | —                                  |
| Philippines*                          | -2.86 (-8.58, 3.23)   | -1.78 (-6.65, 3.35)   | -4.18 (-7.57, -0.68)          | -4.15 (-7.15, -1.05)       | -0.83 (-3.96, 2.41)  | —                      | -3.06 (-8.90, 3.16)                |
| Republic of Korea*                    | -1.77 (-6.32, 3.00)   | -0.09 (-3.12, 3.03)   | 0.86 (-0.66, 2.39)            | 4.90 (2.00, 7.88)          | 9.09 (7.29, 10.92)   | 7.48 (-0.11, 15.64)    | -6.37 (-11.08, -1.41)              |
| Thailand*                             | -1.06 (-10.07, 8.86)  | -2.30 (-7.46, 3.15)   | 1.18 (-2.23, 4.71)            | 0.53 (-5.56, 7.00)         | 1.46 (-3.83, 7.04)   | 1.42 (-8.33, 12.20)    | 0.55 (-6.44, 8.07)                 |
| Turkey*                               | 10.87 (6.87, 15.02)   | 4.80 (-1.48, 11.48)   | 2.37 (0.15, 4.64)             | 1.75 (-2.46, 6.15)         | 4.37 (1.54, 7.28)    | -3.21 (-12.58, 7.17)   | 2.19 (-4.20, 9.01)                 |
| <b>Europe</b>                         |                       |                       |                               |                            |                      |                        |                                    |
| Austria                               | -7.00 (-12.46, -1.19) | 4.06 (-0.24, 8.54)    | 0.00 (-2.56, 2.64)            | 0.36 (-3.21, 4.07)         | 4.81 (1.22, 8.52)    | 1.75 (-6.97, 11.30)    | 3.76 (-4.62, 12.89)                |
| Belarus                               | 2.22 (-2.82, 7.52)    | 2.01 (-1.79, 5.96)    | 1.24 (-0.32, 2.83)            | 0.09 (-2.99, 3.27)         | 2.88 (0.47, 5.35)    | -8.66 (-15.07, -1.75)  | -2.25 (-6.83, 2.55)                |
| Bulgaria                              | 9.96 (4.01, 16.25)    | -1.05 (-5.92, 4.07)   | -1.27 (-3.11, 0.61)           | 3.71 (0.62, 6.90)          | 1.83 (-0.34, 4.05)   | 4.12 (-3.27, 12.07)    | -4.34 (-7.96, -0.58)               |
| Croatia                               | 3.78 (-0.08, 7.78)    | 2.17 (-3.62, 8.32)    | -2.73 (-5.15, -0.23)          | 12.45 (6.59, 18.63)        | 3.29 (-1.77, 8.62)   | 2.07 (-3.35, 7.80)     | -10.53 (-15.59, -5.17)             |
| Cyprus                                | -2.40 (-7.19, 2.64)   | -0.07 (-9.12, 9.87)   | -1.13 (-8.10, 6.36)           | 2.13 (-4.94, 9.73)         | 1.01 (-6.56, 9.18)   | —                      | —                                  |
| Czech Republic                        | 0.44 (-4.02, 5.12)    | 2.84 (-1.65, 7.54)    | -0.99 (-2.84, 0.89)           | -1.09 (-4.41, 2.35)        | -0.97 (-3.16, 1.28)  | -3.29 (-7.65, 1.28)    | -9.97 (-17.00, -2.35)              |
| Denmark                               | -7.35 (-14.72, 0.65)  | -2.99 (-9.19, 3.64)   | -1.54 (-3.69, 0.67)           | 8.13 (4.10, 12.32)         | -3.68 (-9.81, 2.87)  | 2.93 (-6.38, 13.17)    | 0.78 (-3.23, 4.96)                 |
| Estonia                               | -1.77 (-15.50, 14.20) | 2.19 (-3.82, 8.58)    | -2.86 (-6.83, 1.27)           | -1.85 (-6.53, 3.07)        | 1.28 (-4.47, 7.38)   | —                      | —                                  |
| France*                               | 0.54 (-5.32, 6.75)    | -1.75 (-5.12, 1.74)   | 0.19 (-1.34, 1.75)            | -1.81 (-5.63, 2.15)        | -2.67 (-8.40, 3.41)  | 2.08 (-3.75, 8.27)     | -3.18 (-11.25, 5.64)               |
| Germany*                              | 2.59 (-5.42, 11.28)   | -0.82 (-8.53, 7.53)   | -0.91 (-3.20, 1.43)           | -1.17 (-7.44, 5.53)        | 5.9 (-0.97, 13.25)   | -13.28 (-23.20, -2.08) | 5.79 (0.08, 11.81)                 |
| Iceland                               | -2.05 (-5.00, 0.99)   | -1.19 (-5.48, 3.30)   | -6.94 (-12.39, -1.16)         | -2.55 (-15.57, 12.48)      | -0.20 (-0.73, 0.33)  | —                      | —                                  |
| Ireland                               | 3.02 (-4.38, 11.00)   | -0.53 (-6.43, 5.75)   | -0.93 (-3.93, 2.16)           | -3.76 (-9.45, 2.29)        | -2.11 (-6.79, 2.81)  | -2.00 (-8.86, 5.38)    | -0.60 (-7.54, 6.87)                |
| Italy*                                | -0.72 (-5.79, 4.63)   | -6.13 (-11.52, -0.42) | 3.88 (0.40, 7.48)             | 1.91 (-5.56, 9.96)         | 2.82 (-2.09, 7.97)   | -7.70 (-14.84, 0.04)   | 4.42 (-0.70, 9.81)                 |
| Lithuania                             | 3.42 (-3.13, 10.41)   | 1.06 (-3.94, 6.32)    | 1.46 (-0.47, 3.42)            | 0.17 (-5.13, 5.77)         | -0.19 (-4.17, 3.96)  | 11.09 (4.75, 17.81)    | 0.35 (-0.11, 0.82)                 |
| Malta                                 | —                     | —                     | 3.78 (-3.41, 11.51)           | -0.98 (-10.02, 8.98)       | -4.37 (-16.44, 9.44) | —                      | —                                  |
| Netherlands                           | 0.10 (-3.90, 4.27)    | 2.19 (-1.27, 5.77)    | 0.62 (-0.97, 2.23)            | -2.45 (-4.85, 0.01)        | -0.51 (-4.06, 3.18)  | -0.71 (-6.29, 5.20)    | 2.41 (-2.51, 7.59)                 |
| Norway                                | -3.15 (-11.17, 5.59)  | 1.38 (-3.28, 6.27)    | -1.23 (-4.13, 1.76)           | -0.67 (-6.06, 5.02)        | 6.96 (-1.20, 15.79)  | 3.88 (-4.71, 13.24)    | 4.68 (-1.56, 11.31)                |
| Poland*                               | -2.26 (-5.82, 1.44)   | -1.61 (-7.84, 5.03)   | -2.49 (-6.39, 1.57)           | -4.17 (-11.84, 4.17)       | 0.94 (-4.43, 6.62)   | -0.89 (-4.00, 2.32)    | -0.78 (-3.58, 2.11)                |
| Slovenia                              | -2.33 (-6.83, 2.40)   | 4.74 (-0.42, 10.17)   | 2.20 (-3.64, 8.40)            | 0.64 (-9.04, 8.54)         | 1.97 (-7.02, 11.83)  | 2.70 (-4.48, 10.42)    | —                                  |
| Spain*                                | -0.64 (-6.88, 6.02)   | -3.31 (-7.58, 1.17)   | -3.38 (-5.63, -1.08)          | -5.73 (-9.27, -2.05)       | 1.66 (-2.20, 5.67)   | -1.86 (-11.63, 8.99)   | 0.05 (-7.01, 7.65)                 |
| Switzerland*                          | 6.15 (-2.95, 16.11)   | -0.84 (-8.59, 7.56)   | -1.56 (-6.90, 4.07)           | -2.54 (-7.24, 2.39)        | -0.88 (-7.31, 5.99)  | 5.56 (-2.22, 13.96)    | -5.08 (-9.77, -0.15)               |
| United Kingdom*                       | -4.19 (-6.55, -1.76)  | -0.03 (-1.75, 1.71)   | -0.83 (-1.59, -0.05)          | 0.97 (-0.43, 2.39)         | 5.42 (4.07, 6.79)    | 1.13 (-1.90, 4.26)     | 1.55 (-3.77, 7.16)                 |
| <b>Oceania</b>                        |                       |                       |                               |                            |                      |                        |                                    |
| Australia                             | -7.42 (-12.87, -1.63) | -2.50 (-4.87, -0.07)  | 0.84 (-0.73, 2.44)            | 1.35 (-0.64, 3.38)         | 4.28 (2.67, 5.92)    | -5.71 (-10.28, -0.92)  | -1.75 (-8.32, 5.29)                |
| New Zealand                           | -8.42 (-16.01, -0.15) | 1.02 (-4.15, 6.47)    | 0.43 (-3.28, 4.29)            | -1.46 (-3.72, 0.85)        | 11.05 (9.05, 13.09)  | -3.44 (-10.36, 4.01)   | 4.27 (-3.75, 12.95)                |

| Country                               | Hodgkin lymphoma     | Kaposi sarcoma         | Larynx                | Leukaemia             | Lip, oral cavity and pharynx | Liver and intrahepatic bile ducts | Lung (incl. trachea) |
|---------------------------------------|----------------------|------------------------|-----------------------|-----------------------|------------------------------|-----------------------------------|----------------------|
| <b>Africa</b>                         |                      |                        |                       |                       |                              |                                   |                      |
| Uganda*                               | 2.38 (-7.29, 13.06)  | -4.43 (-6.27, -2.54)   | -6.13 (-12.18, 0.33)  | 11.37 (6.67, 16.27)   | -1.22 (-10.00, 8.41)         | 5.06 (-0.17, 10.57)               | 4.70 (-4.08, 14.28)  |
| <b>South America</b>                  |                      |                        |                       |                       |                              |                                   |                      |
| Brazil*                               | 6.37 (-0.14, 13.30)  | —                      | —                     | -5.37 (-13.00, 2.92)  | -5.80 (-13.75, 2.87)         | 0.22 (-8.41, 9.67)                | 5.72 (-0.70, 12.55)  |
| Chile*                                | -2.39 (-13.08, 9.61) | —                      | —                     | -0.15 (-7.54, 7.83)   | —                            | —                                 | —                    |
| Colombia*                             | 3.50 (-2.55, 9.93)   | -0.54 (-7.76, 7.25)    | —                     | -0.36 (-2.67, 2.00)   | 1.75 (-2.64, 6.35)           | -3.57 (-9.46, 2.69)               | 1.82 (-5.95, 10.22)  |
| Ecuador*                              | 0.44 (-6.62, 8.05)   | —                      | —                     | -0.84 (-3.78, 2.19)   | 0.52 (-6.65, 8.23)           | 1.52 (-5.30, 8.84)                | 9.07 (-2.89, 22.50)  |
| <b>North America</b>                  |                      |                        |                       |                       |                              |                                   |                      |
| Canada*                               | -0.54 (-1.45, 0.38)  | -4.62 (-9.48, 0.50)    | 5.31 (-1.84, 12.99)   | 0.50 (-0.82, 1.83)    | -0.45 (-1.72, 0.83)          | 3.15 (-2.01, 8.58)                | -3.47 (-5.42, -1.47) |
| United States of America*             | -0.25 (-0.62, 0.11)  | -6.47 (-9.15, -3.72)   | -4.61 (-6.57, -2.62)  | 1.48 (1.09, 1.86)     | 0.69 (0.07, 1.32)            | 1.12 (0.12, 2.13)                 | -2.58 (-3.03, -2.12) |
| USA-American, Indian, Alaskan Native* | -0.73 (-5.49, 4.28)  | —                      | —                     | -0.33 (-2.39, 1.77)   | 0.22 (-6.74, 7.70)           | -6.27 (-10.49, -1.87)             | -4.72 (-11.53, 2.61) |
| USA-Asian-Pacific Islander*           | 3.54 (0.87, 6.28)    | —                      | 3.99 (-8.22, 17.82)   | 1.19 (-0.61, 3.03)    | -0.50 (-2.48, 1.53)          | 0.09 (-4.07, 4.44)                | -0.85 (-3.17, 1.53)  |
| USA-Black*                            | 1.36 (0.63, 2.09)    | -4.99 (-9.04, -0.75)   | -9.18 (-15.53, -2.36) | 0.98 (0.24, 1.72)     | 0.45 (-0.98, 1.89)           | 1.01 (-1.07, 3.13)                | -4.60 (-5.94, -3.24) |
| USA-White*                            | -0.43 (-0.84, -0.01) | -11.09 (-16.33, -5.53) | -4.41 (-6.46, -2.32)  | 1.65 (1.22, 2.09)     | 0.91 (0.17, 1.66)            | 1.28 (0.18, 2.40)                 | -2.23 (-2.78, -1.67) |
| <b>Asia</b>                           |                      |                        |                       |                       |                              |                                   |                      |
| Bahrain*                              | -3.29 (-8.41, 2.12)  | —                      | —                     | -4.69 (-11.57, 2.72)  | -3.11 (-7.95, 1.99)          | -3.69 (-14.40, 8.36)              | —                    |
| China*                                | 4.26 (1.73, 6.85)    | —                      | 8.54 (-4.47, 23.31)   | -1.10 (-2.38, 0.19)   | -3.37 (-4.52, -2.21)         | -2.20 (-4.02, -0.34)              | -0.34 (-2.25, 1.61)  |
| India*                                | -2.97 (-8.15, 2.51)  | —                      | -1.37 (-7.94, 5.66)   | 3.60 (0.18, 7.14)     | 1.78 (-1.74, 5.43)           | 2.56 (-7.49, 13.70)               | 3.95 (-2.48, 10.79)  |
| Israel                                | -0.93 (-2.07, 0.23)  | -10.16 (-18.18, -1.35) | -0.79 (-6.91, 5.74)   | -1.63 (-3.36, 0.14)   | 0.97 (-3.19, 5.31)           | -4.41 (-9.59, 1.07)               | -3.04 (-6.36, 0.40)  |
| Japan*                                | 10.89 (6.76, 15.18)  | —                      | 1.35 (-23.06, 33.49)  | 1.09 (-1.37, 3.61)    | 6.15 (3.55, 8.82)            | 1.43 (-1.54, 4.49)                | 3.00 (0.26, 5.82)    |
| Kuwait*                               | 7.25 (2.64, 12.07)   | —                      | —                     | 0.05 (-6.04, 6.54)    | -4.50 (-10.05, 1.39)         | —                                 | -6.25 (-14.25, 2.50) |
| Philippines*                          | 1.24 (-2.12, 4.71)   | —                      | 1.86 (-7.18, 11.79)   | -2.12 (-3.85, -0.36)  | -1.47 (-3.29, 0.38)          | -4.00 (-6.39, -1.54)              | -1.59 (-4.14, 1.03)  |
| Republic of Korea*                    | 7.79 (3.99, 11.73)   | 3.59 (-0.86, 8.24)     | -6.37 (-13.27, 1.08)  | -0.01 (-1.21, 1.21)   | 3.68 (2.18, 5.20)            | -2.84 (-4.71, -0.93)              | -0.02 (-1.71, 1.69)  |
| Thailand*                             | 10.00 (3.05, 17.41)  | —                      | -4.28 (-9.79, 1.56)   | 0.10 (-2.19, 2.45)    | 0.77 (-1.59, 3.19)           | -2.53 (-6.22, 1.31)               | 1.01 (-0.97, 3.03)   |
| Turkey*                               | 2.55 (-0.65, 5.85)   | 1.19 (-3.56, 6.17)     | 0.05 (-9.75, 10.91)   | 2.48 (0.03, 4.98)     | 1.87 (-1.00, 4.83)           | 0.29 (-6.48, 7.54)                | 0.90 (-3.18, 5.15)   |
| <b>Europe</b>                         |                      |                        |                       |                       |                              |                                   |                      |
| Austria                               | 1.25 (-0.74, 3.29)   | —                      | 1.63 (-9.19, 13.73)   | -0.64 (-2.58, 1.34)   | 0.31 (-2.86, 3.58)           | -4.97 (-12.41, 3.09)              | 1.82 (-0.82, 4.53)   |
| Belarus                               | 0.59 (-0.83, 2.02)   | —                      | 1.18 (-3.29, 5.86)    | 0.46 (-1.47, 2.42)    | -0.23 (-4.19, 3.91)          | 5.93 (0.87, 11.25)                | 1.57 (-0.41, 3.58)   |
| Bulgaria                              | 1.50 (-0.50, 3.53)   | —                      | 0.38 (-6.47, 7.74)    | 0.98 (-2.31, 4.39)    | 1.37 (-3.03, 5.98)           | -2.46 (-9.47, 5.10)               | 0.40 (-2.30, 3.17)   |
| Croatia                               | 0.18 (-2.14, 2.55)   | —                      | -2.22 (-3.89, -0.52)  | -7.09 (-10.71, -3.31) | -4.11 (-10.88, 3.18)         | -2.38 (-9.42, 5.20)               | -1.92 (-7.97, 4.53)  |
| Cyprus                                | 0.61 (-2.67, 4.00)   | —                      | —                     | -2.81 (-8.46, 3.18)   | -3.14 (-10.02, 4.26)         | -1.87 (-3.33, -0.40)              | 4.55 (-2.97, 12.65)  |
| Czech Republic                        | -0.33 (-2.09, 1.45)  | —                      | -4.64 (-9.91, 0.94)   | 0.86 (-1.76, 3.54)    | 1.79 (-2.14, 5.88)           | -1.42 (-8.48, 6.20)               | 2.09 (-1.04, 5.33)   |
| Denmark                               | 1.84 (-0.78, 4.53)   | -6.34 (-13.52, 1.43)   | 1.34 (-12.90, 17.90)  | -1.75 (-4.26, 0.83)   | -1.15 (-5.05, 2.91)          | 3.17 (-3.44, 10.24)               | -2.82 (-7.17, 1.73)  |
| Estonia                               | -0.59 (-3.57, 2.49)  | —                      | 2.77 (-6.93, 13.48)   | -0.18 (-4.46, 4.30)   | 4.67 (-2.00, 11.80)          | -2.79 (-10.21, 5.24)              | -0.12 (-7.43, 7.76)  |
| France*                               | 1.89 (-0.95, 4.82)   | 6.89 (-2.78, 17.52)    | -2.55 (-9.36, 4.78)   | -1.46 (-4.06, 1.21)   | 1.24 (-3.11, 5.78)           | -0.18 (-5.14, 5.04)               | 0.48 (-3.73, 4.87)   |
| Germany*                              | -1.05 (-5.24, 3.33)  | —                      | —                     | 0.89 (-3.75, 5.75)    | 5.69 (-1.80, 13.75)          | 7.54 (-0.60, 16.34)               | 0.06 (-6.94, 7.59)   |
| Iceland                               | 6.64 (-5.11, 19.86)  | —                      | —                     | 1.52 (-4.55, 7.98)    | -4.30 (-13.67, 6.09)         | —                                 | -3.96 (-10.57, 3.15) |
| Ireland                               | 3.18 (0.29, 6.15)    | 2.84 (-6.99, 13.71)    | -1.81 (-3.65, 0.06)   | 1.49 (-1.39, 4.46)    | 6.27 (1.26, 11.53)           | 6.23 (-0.37, 13.26)               | 1.17 (-3.72, 6.32)   |
| Italy*                                | 2.01 (-0.56, 4.65)   | -4.97 (-11.32, 1.84)   | -4.57 (-9.75, 0.91)   | -1.72 (-5.67, 2.39)   | 1.51 (-4.18, 7.54)           | -1.01 (-9.07, 7.77)               | 0.10 (-5.13, 5.61)   |
| Lithuania                             | -1.87 (-4.43, 0.77)  | —                      | —                     | 2.56 (0.18, 5.00)     | 2.88 (-2.33, 8.37)           | 0.85 (-5.35, 7.47)                | 1.19 (-7.60, 10.83)  |
| Malta                                 | 7.82 (1.79, 14.19)   | —                      | —                     | 1.30 (-3.71, 6.56)    | 4.77 (-1.88, 11.87)          | —                                 | -0.80 (-7.33, 6.20)  |
| Netherlands                           | 1.06 (-0.39, 2.53)   | -0.52 (-7.65, 7.17)    | -1.46 (-7.63, 5.11)   | -0.12 (-2.17, 1.97)   | 2.19 (-0.42, 4.87)           | 3.01 (-1.80, 8.06)                | -1.08 (-2.50, 0.36)  |
| Norway                                | 1.17 (-1.25, 3.65)   | 2.74 (0.10, 5.45)      | -5.18 (-8.52, -1.71)  | 2.56 (-1.86, 7.19)    | 3.37 (-0.72, 7.63)           | 1.50 (-4.04, 7.35)                | 0.03 (-3.45, 3.63)   |
| Poland*                               | -0.50 (-3.99, 3.11)  | —                      | —                     | 7.21 (0.09, 14.83)    | 4.62 (-1.24, 10.82)          | 2.75 (-0.41, 6.01)                | -1.44 (-7.35, 4.84)  |
| Slovenia                              | -1.42 (-3.96, 1.18)  | —                      | —                     | -2.12 (-6.33, 2.28)   | -4.33 (-11.36, 3.25)         | -3.09 (-3.37, -2.80)              | 3.81 (-4.03, 12.28)  |
| Spain*                                | 1.27 (-0.68, 3.27)   | -4.93 (-10.93, 1.48)   | 3.36 (-3.98, 11.25)   | 0.69 (-1.29, 2.71)    | 2.99 (-3.15, 9.51)           | 0.54 (-9.55, 11.76)               | -4.88 (-8.27, -1.37) |
| Switzerland*                          | -0.67 (-4.15, 2.93)  | -1.12 (-9.11, 7.57)    | —                     | 0.22 (-6.31, 7.21)    | 3.63 (-2.09, 9.69)           | 1.09 (-7.36, 10.33)               | -1.88 (-8.52, 5.24)  |
| United Kingdom*                       | 1.17 (0.64, 1.70)    | 4.48 (-1.35, 10.64)    | 3.83 (-0.78, 8.65)    | 0.04 (-0.88, 0.98)    | 2.77 (1.79, 3.76)            | 4.62 (2.54, 6.75)                 | 1.55 (-0.33, 3.47)   |
| <b>Oceania</b>                        |                      |                        |                       |                       |                              |                                   |                      |
| Australia                             | 2.04 (0.92, 3.18)    | —                      | -6.98 (-14.13, 0.77)  | 0.07 (-1.03, 1.17)    | 0.26 (-1.47, 2.03)           | 0.23 (-4.30, 4.98)                | 1.95 (0.10, 3.83)    |
| New Zealand                           | 0.91 (-1.84, 3.73)   | —                      | —                     | 1.79 (-0.55, 4.19)    | -1.65 (-5.66, 2.53)          | -0.57 (-5.03, 4.10)               | 0.30 (-3.43, 4.18)   |

| Country                               | Melanoma of skin      | Multiple myeloma and immunoproliferative diseases | Non-Hodgkin lymphoma | Oesophagus            | Ovary                | Pancreas              | Stomach               |
|---------------------------------------|-----------------------|---------------------------------------------------|----------------------|-----------------------|----------------------|-----------------------|-----------------------|
| <b>Africa</b>                         |                       |                                                   |                      |                       |                      |                       |                       |
| Uganda*                               | -2.32 (-9.14, 5.01)   | -6.54 (-20.90, 10.42)                             | 4.09 (-0.98, 9.42)   | -4.05 (-11.22, 3.70)  | 2.56 (-4.78, 10.46)  | 1.21 (-34.16, 55.59)  | -7.03 (-16.90, 4.01)  |
| <b>South America</b>                  |                       |                                                   |                      |                       |                      |                       |                       |
| Brazil*                               | 0.85 (-4.01, 5.97)    | —                                                 | -2.69 (-6.53, 1.30)  | —                     | 0.60 (-4.47, 5.93)   | 2.15 (-5.82, 10.79)   | -4.89 (-11.68, 2.41)  |
| Chile*                                | -2.37 (-7.74, 3.31)   | —                                                 | 3.45 (-4.65, 12.23)  | —                     | -4.21 (-10.90, 2.98) | —                     | -5.42 (-13.28, 3.15)  |
| Colombia*                             | -1.57 (-5.82, 2.87)   | 3.74 (-2.65, 10.53)                               | -1.99 (-5.91, 2.09)  | -3.50 (-9.64, 3.06)   | -2.64 (-6.66, 1.55)  | -1.20 (-8.11, 6.24)   | 0.46 (-2.79, 3.81)    |
| Ecuador*                              | 3.39 (-3.60, 10.88)   | 3.03 (-3.28, 9.75)                                | 2.81 (-1.42, 7.22)   | —                     | 0.33 (-5.13, 6.10)   | 1.16 (-3.29, 5.82)    | 3.46 (0.65, 6.34)     |
| <b>North America</b>                  |                       |                                                   |                      |                       |                      |                       |                       |
| Canada*                               | -0.31 (-1.21, 0.61)   | -0.14 (-4.14, 4.02)                               | -1.22 (-2.06, -0.37) | 0.42 (-6.23, 7.55)    | 0.96 (-0.31, 2.25)   | 2.18 (-0.63, 5.08)    | 1.70 (-0.89, 4.36)    |
| United States of America*             | 0.73 (-0.46, 1.93)    | 1.91 (0.70, 3.14)                                 | 0.06 (-0.27, 0.40)   | -0.35 (-3.27, 2.66)   | -0.15 (-0.56, 0.27)  | 3.30 (2.36, 4.26)     | 2.47 (1.92, 3.03)     |
| USA-American, Indian, Alaskan Native* | 1.43 (-4.03, 7.21)    | -8.27 (-15.62, -0.28)                             | -1.25 (-5.57, 3.26)  | 2.93 (-2.57, 8.74)    | -0.25 (-4.96, 4.69)  | -1.45 (-6.81, 4.21)   | -4.77 (-11.03, 1.94)  |
| USA-Asian-Pacific Islander*           | -1.02 (-3.73, 1.76)   | 3.75 (-2.89, 10.83)                               | 0.78 (-0.35, 1.91)   | 2.28 (-9.14, 15.13)   | -0.24 (-1.71, 1.25)  | -1.97 (-7.22, 3.58)   | -0.55 (-3.12, 2.10)   |
| USA-Black*                            | -1.34 (-4.25, 1.65)   | 2.30 (0.42, 4.20)                                 | -0.49 (-1.45, 0.49)  | -3.83 (-8.90, 1.53)   | 0.42 (-0.96, 1.83)   | 3.57 (0.36, 6.88)     | 1.04 (-0.13, 2.22)    |
| USA-White*                            | 1.01 (-0.19, 2.21)    | 1.53 (-0.00, 3.09)                                | 0.12 (-0.19, 0.43)   | 0.69 (-2.74, 4.24)    | -0.12 (-0.51, 0.28)  | 3.69 (2.76, 4.62)     | 3.13 (2.39, 3.87)     |
| <b>Asia</b>                           |                       |                                                   |                      |                       |                      |                       |                       |
| Bahrain*                              | —                     | —                                                 | -1.86 (-8.61, 5.39)  | —                     | 1.22 (-4.79, 7.62)   | —                     | 3.65 (-2.31, 9.98)    |
| China*                                | 2.79 (-3.78, 9.80)    | -5.74 (-10.71, -0.50)                             | 0.93 (-0.77, 2.67)   | -2.70 (-10.07, 5.28)  | 3.89 (-0.17, 8.12)   | -5.67 (-9.61, -1.56)  | -1.91 (-3.78, -0.00)  |
| India*                                | -2.43 (-13.01, 9.44)  | -3.01 (-10.86, 5.54)                              | -1.18 (-4.58, 2.35)  | -2.67 (-9.17, 4.30)   | 2.57 (-0.08, 5.30)   | -3.87 (-10.37, 3.11)  | -0.53 (-4.15, 3.23)   |
| Israel                                | -2.13 (-3.28, -0.98)  | -9.62 (-14.45, -4.51)                             | -0.82 (-2.44, 0.82)  | -5.14 (-12.21, 2.50)  | -1.73 (-3.40, -0.03) | -0.35 (-7.22, 7.03)   | -2.67 (-6.56, 1.39)   |
| Japan*                                | -0.57 (-5.96, 5.14)   | -6.48 (-10.91, -1.84)                             | 2.43 (0.21, 4.70)    | 2.78 (-6.22, 12.64)   | 4.22 (2.36, 6.11)    | 7.55 (3.03, 12.27)    | -4.49 (-5.98, -2.98)  |
| Kuwait*                               | —                     | —                                                 | 1.32 (-6.65, 9.97)   | —                     | -4.66 (-10.23, 1.26) | —                     | -7.09 (-13.67, 0.01)  |
| Philippines*                          | 5.43 (-2.17, 13.61)   | -3.01 (-8.52, 2.82)                               | -0.59 (-3.94, 2.88)  | 2.08 (-5.19, 9.91)    | 0.10 (-1.75, 1.98)   | -7.42 (-14.15, -0.16) | -1.86 (-7.25, 3.85)   |
| Republic of Korea*                    | 0.54 (-3.06, 4.27)    | 1.36 (-4.64, 7.73)                                | 5.11 (4.00, 6.24)    | -5.54 (-11.75, 1.10)  | 1.88 (0.70, 3.08)    | 0.41 (-4.28, 5.33)    | -1.78 (-2.57, -0.98)  |
| Thailand*                             | 4.14 (-2.76, 11.52)   | 11.81 (5.26, 18.76)                               | 2.17 (0.40, 3.98)    | 1.30 (-4.92, 7.92)    | -1.02 (-3.04, 1.04)  | 3.90 (-5.35, 14.05)   | 1.31 (-2.15, 4.90)    |
| Turkey*                               | 4.86 (-2.74, 13.05)   | 1.93 (-3.67, 7.85)                                | 0.40 (-1.21, 2.02)   | 7.96 (1.18, 15.20)    | 2.80 (0.76, 4.89)    | 7.27 (-1.32, 16.62)   | 2.68 (-0.27, 5.72)    |
| <b>Europe</b>                         |                       |                                                   |                      |                       |                      |                       |                       |
| Austria                               | 2.96 (1.52, 4.42)     | 1.05 (-5.55, 8.11)                                | 0.68 (-2.39, 3.84)   | 2.36 (-8.47, 14.48)   | -5.68 (-7.51, -3.81) | 4.06 (-2.00, 10.49)   | -3.07 (-5.82, -0.23)  |
| Belarus                               | 2.56 (0.77, 4.38)     | 6.86 (-1.02, 15.37)                               | 3.62 (0.97, 6.33)    | 4.33 (-0.86, 9.79)    | 4.29 (2.44, 6.17)    | -1.00 (-4.48, 2.61)   | -1.51 (-2.82, -0.18)  |
| Bulgaria                              | 3.40 (-0.27, 7.22)    | 4.39 (-1.65, 10.80)                               | 2.66 (0.44, 4.94)    | -0.23 (-7.09, 7.13)   | -0.48 (-2.36, 1.43)  | 6.46 (-0.60, 14.01)   | -0.58 (-3.80, 2.76)   |
| Croatia                               | 0.16 (-2.21, 2.58)    | -0.69 (-6.77, 5.78)                               | -3.07 (-6.12, 0.07)  | -1.90 (-6.24, 2.65)   | -1.39 (-4.57, 1.89)  | -1.20 (-9.03, 7.30)   | -5.89 (-9.36, -2.29)  |
| Cyprus                                | -0.59 (-8.34, 7.82)   | —                                                 | 5.31 (-1.43, 12.52)  | —                     | -0.53 (-6.44, 5.76)  | —                     | -3.57 (-12.06, 5.75)  |
| Czech Republic                        | 2.38 (1.19, 3.58)     | 3.35 (-2.32, 9.35)                                | 3.95 (1.76, 6.19)    | 1.27 (-3.52, 6.31)    | -6.29 (-8.68, -3.84) | 5.50 (0.49, 10.75)    | -1.39 (-4.48, 1.81)   |
| Denmark                               | 7.33 (5.86, 8.82)     | 3.55 (-4.07, 11.77)                               | 0.55 (-2.35, 3.54)   | -3.04 (-7.94, 2.12)   | -3.04 (-5.76, -0.24) | -3.85 (-9.16, 1.77)   | -0.96 (-7.80, 6.39)   |
| Estonia                               | 9.37 (1.88, 17.42)    | —                                                 | 2.16 (-3.96, 8.67)   | —                     | -1.49 (-6.51, 3.80)  | 2.81 (-4.37, 10.54)   | -7.35 (-13.59, -0.66) |
| France*                               | 3.16 (1.81, 4.53)     | -3.44 (-11.40, 5.24)                              | 0.70 (-0.70, 2.11)   | 3.42 (-3.54, 10.87)   | 1.75 (-0.59, 4.14)   | 3.39 (-4.63, 12.09)   | -0.67 (-3.75, 2.52)   |
| Germany*                              | -3.43 (-6.02, -0.78)  | 2.51 (-8.28, 14.57)                               | -0.63 (-2.14, 0.91)  | -5.41 (-10.30, -0.27) | -3.00 (-7.02, 1.20)  | -0.25 (-5.22, 4.97)   | -2.13 (-9.76, 6.15)   |
| Iceland                               | -6.72 (-10.69, -2.57) | —                                                 | 0.34 (-5.60, 6.65)   | —                     | -5.18 (-11.52, 1.61) | —                     | -2.24 (-4.48, 0.06)   |
| Ireland                               | 1.56 (0.41, 2.72)     | -2.52 (-8.28, 3.60)                               | -0.85 (-3.98, 2.37)  | 4.39 (-0.56, 9.59)    | -1.70 (-4.53, 1.21)  | -1.92 (-8.94, 5.64)   | -0.88 (-6.07, 4.59)   |
| Italy*                                | 3.33 (0.43, 6.31)     | -4.59 (-11.95, 3.40)                              | -1.13 (-3.97, 1.80)  | -1.02 (-6.04, 4.26)   | -0.26 (-3.51, 3.09)  | 1.58 (-5.29, 8.95)    | -8.27 (-12.58, -3.75) |
| Lithuania                             | 0.93 (-2.36, 4.32)    | -3.13 (-15.04, 10.44)                             | 5.92 (2.07, 9.92)    | —                     | 0.07 (-2.39, 2.59)   | 2.99 (-5.56, 12.31)   | -0.66 (-7.35, 6.51)   |
| Malta                                 | 8.01 (-3.63, 21.05)   | —                                                 | 6.50 (-4.46, 18.72)  | —                     | -3.06 (-9.87, 4.25)  | —                     | -2.15 (-2.83, -1.46)  |
| Netherlands                           | 2.28 (1.19, 3.39)     | -5.25 (-7.90, -2.52)                              | 1.45 (0.49, 2.41)    | -4.85 (-10.59, 1.26)  | -0.86 (-2.51, 0.83)  | 3.82 (-0.70, 8.55)    | 3.85 (0.79, 7.01)     |
| Norway                                | 0.35 (-0.94, 1.65)    | 4.37 (-1.07, 10.12)                               | 4.10 (0.42, 7.92)    | 1.95 (-0.64, 4.62)    | -3.07 (-6.48, 0.48)  | 6.75 (0.06, 13.88)    | -6.72 (-12.25, -0.83) |
| Poland*                               | 1.36 (-4.46, 7.54)    | —                                                 | 1.21 (-4.54, 7.32)   | —                     | -1.02 (-6.72, 5.01)  | -7.70 (-10.79, -4.50) | 0.91 (-6.98, 9.47)    |
| Slovenia                              | 7.27 (4.86, 9.74)     | 0.32 (-0.04, 0.67)                                | 0.10 (-2.77, 3.05)   | —                     | 1.20 (-2.15, 4.67)   | -4.64 (-9.80, 0.82)   | -2.40 (-6.96, 2.38)   |
| Spain*                                | -1.51 (-3.72, 0.75)   | 2.05 (-5.84, 10.60)                               | -2.31 (-4.71, 0.15)  | -1.59 (-1.87, -1.32)  | -1.06 (-3.62, 1.56)  | -0.04 (-4.04, 4.14)   | -1.24 (-4.60, 2.23)   |
| Switzerland*                          | -1.01 (-2.66, 0.68)   | -0.43 (-11.22, 11.66)                             | -1.23 (-4.14, 1.77)  | 0.48 (-1.29, 2.28)    | 0.69 (-4.77, 6.46)   | 4.74 (-3.75, 13.98)   | -1.52 (-6.55, 3.77)   |
| United Kingdom*                       | 2.59 (1.56, 3.63)     | 3.25 (0.34, 6.23)                                 | 0.94 (0.14, 1.75)    | -1.70 (-5.47, 2.23)   | 0.77 (-0.20, 1.75)   | 5.25 (3.61, 6.92)     | 1.63 (-0.34, 3.64)    |
| <b>Oceania</b>                        |                       |                                                   |                      |                       |                      |                       |                       |
| Australia                             | -2.84 (-3.33, -2.34)  | 4.53 (-2.14, 11.64)                               | 1.26 (0.11, 2.43)    | -3.45 (-9.95, 3.52)   | 0.75 (-0.51, 2.01)   | 4.23 (-2.31, 11.20)   | -0.48 (-2.88, 1.97)   |
| New Zealand                           | -2.42 (-3.68, -1.15)  | -1.13 (-5.55, 3.49)                               | 0.24 (-2.17, 2.71)   | -8.95 (-16.34, -0.89) | 0.03 (-1.97, 2.07)   | 8.37 (0.84, 16.46)    | 2.53 (-1.47, 6.69)    |

\*Sub-National

†An em-dash (—) denotes that too few cancer cases were observed to calculate the AAPC
